# Supplementary material for: Prevalence of hyperuricaemia in an Eastern Chinese population: a cross-sectional study
Source: PubMed Central journal article supplement — BMJ Open. 2020 May 20;10(5):e035614. doi: 10.1136/bmjopen-2019-035614 (PMC7247391; doi:10.1136/bmjopen-2019-035614), 2020-05-20
Supplement: bmjopen-2019-035614.draft_revisions.pdf [file bmjopen-2019-035614.draft_revisions.pdf]

# BMJ Open

BMJ Open is committed to open peer review. As part of this commitment we make the peer review history of every article we publish publicly available.

When an article is published we post the peer reviewers' comments and the authors' responses online. We also post the versions of the paper that were used during peer review. These are the versions that the peer review comments apply to.

The versions of the paper that follow are the versions that were submitted during the peer review process. They are not the versions of record or the final published versions. They should not be cited or distributed as the published version of this manuscript.

BMJ Open is an open access journal and the full, final, typeset and author-corrected version of record of the manuscript is available on our site with no access controls, subscription charges or pay-per-view fees (<http://bmjopen.bmj.com>).

If you have any questions on BMJ Open's open peer review process please email [info.bmjopen@bmj.com](mailto:info.bmjopen@bmj.com)

# BMJ Open

## Prevalence of hyperuricemia in the eastern Chinese population

|                               |                                                                                                                                                                                                                                                                                                                                                                                                                                                                                                                          |
|-------------------------------|--------------------------------------------------------------------------------------------------------------------------------------------------------------------------------------------------------------------------------------------------------------------------------------------------------------------------------------------------------------------------------------------------------------------------------------------------------------------------------------------------------------------------|
| Journal:                      | <i>BMJ Open</i>                                                                                                                                                                                                                                                                                                                                                                                                                                                                                                          |
| Manuscript ID                 | bmjopen-2019-035614                                                                                                                                                                                                                                                                                                                                                                                                                                                                                                      |
| Article Type:                 | Original research                                                                                                                                                                                                                                                                                                                                                                                                                                                                                                        |
| Date Submitted by the Author: | 11-Nov-2019                                                                                                                                                                                                                                                                                                                                                                                                                                                                                                              |
| Complete List of Authors:     | Han, Bing; Shanghai Jiao Tong University,<br>Wang, Ningjian; Shanghai 9th Peoples Hospital Affiliated to Shanghai Jiaotong University School of Medicine<br>Chen, Yi; Shanghai 9th Peoples Hospital Affiliated to Shanghai Jiaotong University School of Medicine<br>Li, Qin; Shanghai 9th Peoples Hospital Affiliated to Shanghai Jiaotong University School of Medicine<br>Zhu, Chunfang ; Shanghai 9th Peoples Hospital Affiliated to Shanghai Jiaotong University School of Medicine<br>Chen, Yingchao<br>Lu, Yingli |
| Keywords:                     | General endocrinology < DIABETES & ENDOCRINOLOGY, EPIDEMIOLOGY, Diabetes & endocrinology < INTERNAL MEDICINE                                                                                                                                                                                                                                                                                                                                                                                                             |
|                               |                                                                                                                                                                                                                                                                                                                                                                                                                                                                                                                          |

SCHOLARONE™  
Manuscripts

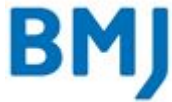

I, the Submitting Author has the right to grant and does grant on behalf of all authors of the Work (as defined in the below author licence), an exclusive licence and/or a non-exclusive licence for contributions from authors who are: i) UK Crown employees; ii) where BMJ has agreed a CC-BY licence shall apply, and/or iii) in accordance with the terms applicable for US Federal Government officers or employees acting as part of their official duties; on a worldwide, perpetual, irrevocable, royalty-free basis to BMJ Publishing Group Ltd ("BMJ") its licensees and where the relevant Journal is co-owned by BMJ to the co-owners of the Journal, to publish the Work in this journal and any other BMJ products and to exploit all rights, as set out in our [licence](#).

The Submitting Author accepts and understands that any supply made under these terms is made by BMJ to the Submitting Author unless you are acting as an employee on behalf of your employer or a postgraduate student of an affiliated institution which is paying any applicable article publishing charge ("APC") for Open Access articles. Where the Submitting Author wishes to make the Work available on an Open Access basis (and intends to pay the relevant APC), the terms of reuse of such Open Access shall be governed by a Creative Commons licence – details of these licences and which [Creative Commons](#) licence will apply to this Work are set out in our licence referred to above.

Other than as permitted in any relevant BMJ Author's Self Archiving Policies, I confirm this Work has not been accepted for publication elsewhere, is not being considered for publication elsewhere and does not duplicate material already published. I confirm all authors consent to publication of this Work and authorise the granting of this licence.

1  
2  
3 **Prevalence of hyperuricemia in the eastern Chinese population**  
4

5  
6 2 Bing Han\*, Ningjian Wang, Yi Chen, Qin Li, Chunfang Zhu, Yingchao Chen and Yingli Lu\*  
7

8  
9 3 Institute and Department of Endocrinology and Metabolism, Shanghai Ninth People's  
10 4 Hospital Affiliated to Shanghai Jiaotong University School of Medicine, Shanghai, China  
11  
12

13 5

14  
15 6 Correspondance: Dr Yingli Lu, luyingli2008@126.com and Bing Han,  
16 7 hanbing1423@163.com.  
17

18  
19 8 Running title: Prevalence of hyperuricemia in China.  
20  
21  
22  
23  
24  
25  
26  
27  
28  
29  
30  
31  
32  
33  
34  
35  
36  
37  
38  
39  
40  
41  
42  
43  
44  
45  
46  
47  
48  
49  
50  
51  
52  
53  
54  
55  
56  
57  
58  
59  
60

1  
2  
3  
4 9 **Statement of authorship**

5  
6 10 The work has not been published previously, and not under consideration for publication  
7  
8 11 elsewhere. All authors have reviewed and approved the final version.

9  
10 12 **The author contribution lists**

11  
12 13 YL, BH designed and supervised this investigation. BH performed this investigation. YC,  
13  
14 14 CFZ and YCC contributed to the data collection. NJW and QL provided technical or material  
15  
16 15 support. All authors read and approved the final manuscript.

17  
18 16 **Data Sharing Statement**

19  
20 17 Please contact to corresponding author.

21  
22 18 **Conflict of interests**

23  
24 19 The authors have declared that no competing interests exist.

25  
26 20 **Acknowledgments**

27  
28 21 We thank all the participants in the study.

29  
30 22 **Compliance with Ethical Standards**

31  
32 23 All procedures performed in this study were in accordance with the principles of the Helsinki  
33  
34 24 Declaration II.

35  
36 25 **Funding**

37  
38 26 The SPECT-China study was supported by ① National Natural Science Foundation of  
39  
40 27 China (81670717), ② Clinical Potential Subject Construction of Shanghai Jiaotong  
41  
42 28 University School of Medicine[2014], ③“973” fund by Ministry of Science and Technology  
43  
44 29 in China (2012CB524906), ④ major project of Science and Technology Commission of  
45  
46 30 Shanghai Municipality from Yangtze River Delta epidemiological and intervention studies of  
47  
48 31 environmental pollution and type 2 diabetes (14495810700 ), ⑤Shanghai Municipal Health  
49  
50 32 Bureau (20124262), ⑥ Funding for young teacher's training programme in Shanghai  
51  
52 33 Colleges(ZZjdyx13114).

53  
54 34 **Ethical approval**

55  
56 35 The study protocol was approved by the Institutional Review Board of the Shanghai Ninth  
57  
58 36 People's Hospital affiliated with Shanghai Jiaotong University School of Medicine.

59  
60 37 **Informed consent**

38  
39  
40  
41  
42  
43  
44  
45  
46  
47  
48  
49  
50  
51  
52  
53  
54  
55  
56  
57  
58  
59  
60 38 Written consent was obtained from all the participants.

1  
2  
3  
4  
5  
6  
7  
8  
9  
10  
11  
12  
13  
14  
15  
16  
17  
18  
19  
20  
21  
22  
23  
24  
25  
26  
27  
28  
29  
30  
31  
32  
33  
34  
35  
36  
37  
38  
39  
40  
41  
42  
43  
44  
45  
46  
47  
48  
49  
50  
51  
52  
53  
54  
55  
56  
57  
58  
59  
60

39 **Patient and public involvement:**

40 Patients and the public were not involved in this study.

1  
2  
3  
4 41 **ABSTRACT**

5 42 **Objectives:** In the past decade, China has experienced a large scale of urbanization as well as  
6  
7 43 rapid economic growth. The aim of this study was to further investigate the prevalence of  
8  
9 44 hyperuricemia (HUA) in the eastern Chinese population.

10  
11 45 **Design:** Cross-sectional study.

12  
13 46 **Setting:** SPECT-China study.

14  
15 47 **Participants:** In this study, 12,770 residents from 22 sites in eastern China were recruited.  
16  
17 48 Finally, 9,225 subjects were included.

18  
19 49 **Main outcome measures:** The serum levels of uric acid, fasting blood glucose (FBG),  
20  
21 50 HbA1c and other metabolic parameters were tested. The waist circumference (WC), weight,  
22  
23 51 height and blood pressure were also measured. Questionnaires regarding smoking, drinking,  
24  
25 52 education, etc. were collected from the subjects.

26  
27 53 **Results:** The prevalence of HUA in the eastern Chinese population was 12.3% (95%CI  
28  
29 54 11.6-12.9%) overall, 17.9% (95%CI 16.7-19.1%) in men and 8.5% (95%CI 7.8-9.3%) in  
30  
31 55 women. The incidence of HUA in urban subjects was higher than that in rural subjects (12.9  
32  
33 56 vs. 10.8,  $P<0.01$ ). The prevalence of HUA was decreased in men and increased in women.  
34  
35 57 Residents with high BMI levels had a higher prevalence of HUA. In the logistic regression  
36  
37 58 analysis, male sex, urban residency, TC, TG, overweight, obesity, SBP and low economic  
38  
39 59 status were independently correlated with HUA.

40  
41 60 **Conclusions:** The estimated prevalence of HUA in the eastern Chinese population was 12.3%  
42  
43 61 overall and 17.9% and 8.5% in men and women, respectively. HUA has gradually become an  
44  
45 62 important public health issue in China.

46  
47 63 **Trial registration:** ChiCTR-ECS-14005052

48  
49 64 **Key Words:** Prevalence, hyperuricemia, economic growth, public health, risk factors  
50  
51  
52  
53  
54  
55  
56  
57  
58  
59  
60

1  
2  
3  
4 65 **Article summary**

5 66 **Strengths and limitations of this study**

67 The estimated prevalence of HUA in the eastern Chinese population was 12.3% overall and

68 17.9% and 8.5% in men and women, respectively.

69 This was a regional survey instead of a national study.

70 We did not consider the influence of diet.



1  
2  
3  
4  
5  
6  
7  
8  
9  
10  
11  
12  
13  
14  
15  
16  
17  
18  
19  
20  
21  
22  
23  
24  
25  
26  
27  
28  
29  
30  
31  
32  
33  
34  
35  
36  
37  
38  
39  
40  
41  
42  
43  
44  
45  
46  
47  
48  
49  
50  
51  
52  
53  
54  
55  
56  
57  
58  
59  
60

71 **Abbreviations:** HUA, hyperuricemia; FBG; fasting blood glucose; WC; waist circumference;  
72 BMI, body mass index; LDL, low-density lipoprotein; TG, triglyceride; HDL, high-density  
73 lipoprotein; TC, total cholesterol.

## 74 **Introduction**

75 In humans, uric acid is the end product of purine metabolism and is mainly excreted via the  
76 kidneys. Xanthine oxidoreductase catalyzes two steps of enzymatic reactions, hypoxanthine  
77 to xanthine and xanthine to uric acid. Several conditions could influence the concentration of  
78 serum uric acid, including purine-rich food intake, neoplastic disease, cytotoxic drugs, obesity,  
79 hypertension, etc [1-3].

80 Uric acid is reported to be associated with oxidative stress and inflammation [1, 4]. In  
81 patients with hyperuricemia (HUA), deposition of uric acid in joints and tissues promotes the  
82 occurrence of gout and chronic nephropathy. HUA has also been reported to be associated  
83 with insulin resistance, NAFLD [5, 6] metabolic syndrome, type 2 diabetes, atherosclerosis  
84 and coronary heart disease [7-11]. The overall prevalence of HUA in adults in the United  
85 States was 21.4% in 2007-2008 [12]. However, in Chinese adults, the adjusted prevalence of  
86 HUA in 2009-2010 was 8.4% [13].

87 In the past decade, China has experienced a large scale of urbanization. The percentage of  
88 the urban population rose from 18% in 1978 to 56% in 2015 [14]. As serum uric acid is  
89 closely related to economic development and urbanization [13], it was necessary to  
90 understand the latest prevalence of HUA in China.

91 China is characterized by regional and economic diversity. Eastern China has a relatively  
92 higher economic status than the rest of the country. In the present study, we performed a  
93 cross-sectional survey to investigate the prevalence of HUA and its risk factors in the eastern  
94 Chinese population.

## 95 **Methods**

### 96 **Study population**

97 Data of the current study are from SPECT-China, which is a population-based cross-sectional  
98 survey on the prevalence of metabolic diseases and risk factors in Eastern China [15]. The  
99 registration number is ChiCTR-ECS-14005052 ([www.chictr.org](http://www.chictr.org)). In this study, 12,770  
100 residents from 22 sites in Shanghai, Zhejiang, Jiangsu, Anhui and Jiangxi provinces were  
101 enrolled from January 2014 to December 2015. The inclusion and exclusion criteria were  
102 described previously. We also excluded residents who had no uric acid data (n=3,535) and  
103 CKD5 stage (n=10). Finally, 9,225 subjects were included (Figure 1). This study was  
104 approved by the ethics committee of the Shanghai Ninth People's Hospital affiliated with  
105 Shanghai Jiaotong University School of Medicine. Written consent was obtained from all the  
106 participants.

### 108 **Measurements and definition**

109 HUA was defined as serum uric acid  $> 420 \mu\text{mol/L}$  for men and  $> 360 \mu\text{mol/L}$  for women  
110 [16]. Blood pressure and heart rate was measured by a sphygmomanometer  
111 (TERUMO-Elemano) three times. The mean of the three records was used in the analysis.  
112 Hypertension was defined as a systolic blood pressure  $\geq 140 \text{ mmHg}$  or diastolic blood  
113 pressure  $\geq 90 \text{ mmHg}$  or any self-reported history of hypertension. Diabetes was defined as a  
114 self-reported history of diabetes or HbA1c levels of 6.5% or more. Prediabetes was defined as  
115 HbA1c concentrations between 5.7% and 6.4%. Normal glucose tolerance (NGT) was defined  
116 as an HbA1c less than 5.7% [17]. Weight and height were measured wearing light clothing  
117 and without shoes. Body mass index (BMI) was calculated as weight (kg)/height squared ( $\text{m}^2$ ).  
118 Overweight was defined as  $25 \text{ kg/m}^2 \leq \text{BMI} < 30 \text{ kg/m}^2$ . Obesity was defined as  $\text{BMI} \geq 30 \text{ kg/m}^2$ .  
119 Waist circumference (WC) was measured at the level of 1 cm above the umbilicus.  
120 Demographic information and lifestyle risk factors were gathered from standard  
121 questionnaires by trained staff. Current smoking was defined as having smoked at least 100  
122 cigarettes in one's lifetime and currently smoking cigarettes [18]. Current drinking was  
123 defined as drinking more than once a month. Current economic status was assessed by the  
124 gross domestic product (GDP) per capita of 2013 in each study site. The mean national GDP

1  
2  
3  
4 125 per capita (6807 US dollars from World Bank) in 2013 was considered the cutoff point for  
5  
6 126 economic status.

7  
8 127

9  
10 128 **Assessment of biomarkers**

11 129 Venous blood samples were drawn from all participants after fasting for at least 8 hours and  
12  
13 130 immediately centrifuged (2000 rpm for 15 min) at room temperature. Blood samples were  
14  
15 131 stored at -20°C when collected and shipped by air in dry ice to one central laboratory certified  
16  
17 132 by the College of American Pathologists within 2-4 hours of collection. All plasma and serum  
18  
19 133 samples were frozen at -80°C after laboratory testing. Serum UA and other biochemical  
20  
21 134 indexes were analyzed by a Beckman Coulter AU 680 device with the original kit. Insulin  
22  
23 135 was tested by an Abbott i2000 SR analyzer with the original kit. HbA1c was detected using  
24  
25 136 high-performance liquid chromatography (HPLC) by MQ-2000PT (Medconn Technology,  
26  
27 137 Shanghai, China) using commercial reagents (HuaChen Biological Reagent Co., Ltd.,  
28  
29 138 Shanghai, China).

30  
31 139

32  
33 140 **Statistical analysis**

34  
35 141 Statistical analysis was performed using IBM SPSS Statistics, Version 22 (IBM Corporation,  
36  
37 142 Armonk, New York). Demographic and metabolic characteristics are expressed as the mean ±  
38  
39 143 SD or as the means (95% CI) for continuous variables and percentages (95% CI) for  
40  
41 144 categorical variables in the overall population and in subgroups of location, age, economic  
42  
43 145 status, BMI and glucose status. Logistic analysis was used to investigate the association of  
44  
45 146 demographic, lifestyle, and metabolic factors with the odds of HUA. All analyses were  
46  
47 147 two-sided.  $P < 0.05$  was considered significant.

## 148 **Results**

### 149 **Characteristics of the eastern Chinese population**

150 In our study, we analyzed the uric acid in 9,225 Chinese adults, including 3,682 males (age,  
151  $55.57 \pm 13.23$  y) and 5,543 females (age  $54.30 \pm 12.82$  y). Levels of serum uric acid were  
152  $352.12 \pm 79.30$  nmol/L and  $269.29 \pm 64.68$  nmol/L in males and females, respectively. There  
153 were significant differences between blood glucose, blood lipids, uric acid, BMI, WC and  
154 blood pressure. The incidence of diabetes and hypertension also showed a significant  
155 difference (Table 1).

### 157 **Metabolic risk factors of the eastern Chinese population**

158 The incidence of diabetes and hypertension, WC, SBP and BMI increased with age. As BMI  
159 and glucose levels rose, the incidence of hypertension, WC, SBP, BMI, TG, FPG, and HbA1c  
160 increased. Moreover, people living in rural areas had a higher incidence of diabetes, WC, SBP,  
161 LDL, HDL, TC and HbA1c. People with a high economic status had a higher incidence of  
162 diabetes, WC, UA, BMI, LDL, FPG, HbA1c and Cr (Tables 2, 3).

### 164 **Estimated prevalence of HUA in the eastern Chinese population**

165 The prevalence of HUA was 12.3% (95%CI 11.6, 12.9%), with 17.9% (95%CI 16.7, 19.1%)  
166 and 8.5% (95%CI 7.8, 9.3%) in males and females, respectively. The prevalence of HUA in  
167 urban areas was higher than that in rural areas (12.9% vs. 10.8%). The ratio of HUA in  
168 developed areas was slightly higher than that in underdeveloped areas (12.6% vs. 11.8%). As  
169 the BMI increased, the prevalence of HUA increased in both men and women. In women, the  
170 proportion of HUA increased in normal, prediabetic and diabetic populations. However, this  
171 trend was not obvious in men (Table 4).

### 173 **Logistic regression analysis of HUA**

174 Male sex, urban residency, increased TC or TG, overweight, obesity, elevated SBP and low  
175 economic status were all risk factors for HUA in the eastern Chinese population (Table 5).  
176 However, increased age, higher educational status, increased LDL or HDL, current smoking  
177 or drinking and elevated DBP were not associated with the risk of HUA.

## 178 Discussion

179 In the Eastern population of China, the prevalence of HUA was 12.3% (95%CI 11.6-12.9%),  
180 which was similar to the pooled prevalence of the systematic review in China (13.3%) [19].  
181 However, this prevalence was more than that in the national HUA survey, which reported that  
182 the prevalence of HUA was 8.4% [13]. The previous survey in China was performed in  
183 2009-2010. Our study occurred in 2014-2015. These two studies investigated different  
184 populations. In addition, our prevalence was relatively lower than that in Qingdao, which is  
185 close to the sea and where residents consume high amounts of seafood and beer [20].  
186 Moreover, the incidence of HUA in our population was lower than those in the United States  
187 and Japan [12, 21], which might be attributed to economic status.

188 The prevalence of HUA in young men (<40 years) was six times more than that in young  
189 women. However, as the age increased, the prevalence of HUA gradually decreased in men  
190 and increased in women, which was coincident with values previously reported [22]. In  
191 residents more than 70 years in age, men and women had a similar prevalence of HUA. We  
192 deduced that the diet of young men contains more purine than that of old men. The young  
193 men also had active metabolisms. The prevalence of HUA was dramatically increased in  
194 women older than 50 years, which might be caused by reduced estrogen levels.

195 In previous studies, the prevalences of HUA in urban areas were much greater than those in  
196 rural areas [13, 22]. However, in our study, the prevalence of HUA in urban areas was mildly  
197 elevated (12.9% vs. 10.8%). Eastern China was the relatively developed area in the whole  
198 country. Therefore, the difference between urban and rural areas was not obvious as in other  
199 places.

200 Risk factors for HUA were also evaluated in our study. We found that male sex, urban  
201 residency, hypertriglyceridemia, hypercholesterolemia, overweight, obesity, high SBP and  
202 low economic status were risk factors for HUA. In previous studies, hypertriglyceridemia was  
203 thought to be the strongest risk factor for HUA [22, 23]. However, the OR for HUA was 1.7  
204 times with 1 SD elevation of triglyceridemia. In addition, obesity was the strongest risk factor  
205 (OR=3.035) in our study. China has the largest obese population in the world [24]. In this  
206 case, the prevalence of HUA will increase with the rising trend of obesity. Therefore, we  
207 should pay more attention to prevent its consequence.

1  
2  
3  
4  
5  
6  
7  
8  
9  
10  
11  
12  
13  
14  
15  
16  
17  
18  
19  
20  
21  
22  
23  
24  
25  
26  
27  
28  
29  
30  
31  
32  
33  
34  
35  
36  
37  
38  
39  
40  
41  
42  
43  
44  
45  
46  
47  
48  
49  
50  
51  
52  
53  
54  
55  
56  
57  
58  
59  
60

208 HUA is closely related to lifestyle and dietary habits. In accordance with a previous study,  
209 smoking was not associated with HUA [13]. However, according to a previous study, alcohol  
210 intake influences the serum UA, which is different from the results of our study. This  
211 difference might have been caused by our definition of current drinking (current drinking was  
212 defined as drinking in the past 1 month), which mixed non-habitual drinkers and habitual  
213 drinkers together.

214 As the age increased, UA together with components of metabolic syndrome (FPG, SBP,  
215 WC) also increased, which indicated there might be a close relationship between metabolic  
216 syndrome and HUA. Other studies have also found that HUA is associated with metabolic  
217 syndrome [25, 26]. An epidemiologic study showed that HUA is positively correlated to  
218 fasting serum insulin [27]. Krishnan et al reported that people with HUA have 1.36 times the  
219 risk of developing insulin resistance in a 15-year follow-up study [28]. Thus, research has  
220 indicated that insulin resistance plays an important role in the relationship between metabolic  
221 syndrome and HUA [29].

222 There were several limitations in our study. First, this was not a national study but a local  
223 survey. Second, we did not consider the influence of diet. Blood was drawn after fasting for  
224 eight hours. However, the diet ingested near to the blood drawing time was unknown. In  
225 addition, this was a cross-sectional study. Therefore, we could not identify a causal  
226 relationship between HUA and its risk factors.

227 In this study, we estimated the prevalence of HUA in the eastern Chinese population. To  
228 prevent the prevalence of HUA, more attention should be paid to life status (such as economic  
229 status and residency localization) and metabolic indexes (TC, TG, BMI, and SBP).

230 **References**

- 231 1. Strazzullo P, Puig JG. Uric acid and oxidative stress: relative impact on cardiovascular  
232 risk? *Nutr Metab Cardiovasc Dis*. 2007;17:409-14.
- 233 2. Strazzullo P, Barba G, Cappuccio FP, et al. Altered renal sodium handling in men with  
234 abdominal adiposity: a link to hypertension. *J Hypertens*. 2001;19:2157-64.
- 235 3. Strazzullo P, Barbato A, Galletti F, et al. Abnormalities of renal sodium handling in the  
236 metabolic syndrome. Results of the Olivetti Heart Study. *J Hypertens*. 2006;24:1633-9.
- 237 4. Kanellis J, Kang DH. Uric acid as a mediator of endothelial dysfunction, inflammation,  
238 and vascular disease. *Semin Nephrol*. 2005;25:39-42.
- 239 5. Xu C, Yu C, Xu L, et al. High serum uric acid increases the risk for nonalcoholic Fatty  
240 liver disease: a prospective observational study. *PLoS One*. 2010;5:e11578.
- 241 6. Ryu S, Chang Y, Kim SG, et al. Serum uric acid levels predict incident nonalcoholic  
242 fatty liver disease in healthy Korean men. *Metabolism*. 2011;60:860-866.
- 243 7. Gustafsson D, Unwin R. The pathophysiology of hyperuricaemia and its possible  
244 relationship to cardiovascular disease, morbidity and mortality. *BMC Nephrol*.  
245 2013;14:164.
- 246 8. Katsiki N, Karagiannis A, Athyros VG, et al. Hyperuricaemia: more than just a cause of  
247 gout? *J Cardiovasc Med (Hagerstown)*. 2013;14:397-402.
- 248 9. Choi HK, Curhan G. Independent impact of gout on mortality and risk for coronary heart  
249 disease. *Circulation*. 2007;116:894-900.
- 250 10. Choi HK, Ford ES. Prevalence of the metabolic syndrome in individuals with  
251 hyperuricemia. *Am J Med*. 2007;120:442-7.
- 252 11. Kim SY, Guevara JP, Kim KM, et al. Hyperuricemia and coronary heart disease: a  
253 systematic review and meta-analysis. *Arthritis Care Res (Hoboken)*. 2010;62:170-80.
- 254 12. Zhu Y, Pandya BJ, Choi HK. Prevalence of gout and hyperuricemia in the US general  
255 population: the National Health and Nutrition Examination Survey 2007-2008. *Arthritis  
256 Rheum*. 2011;63:3136-41.
- 257 13. Liu H, Zhang XM, Wang YL, et al. Prevalence of hyperuricemia among Chinese adults:  
258 a national cross-sectional survey using multistage, stratified sampling. *J Nephrol*.  
259 2014;27:653-8.



1  
2  
3  
4  
5  
6  
7  
8  
9  
10  
11  
12  
13  
14  
15  
16  
17  
18  
19  
20  
21  
22  
23  
24  
25  
26  
27  
28  
29  
30  
31  
32  
33  
34  
35  
36  
37  
38  
39  
40  
41  
42  
43  
44  
45  
46  
47  
48  
49  
50  
51  
52  
53  
54  
55  
56  
57  
58  
59  
60

- 260 14. China National Bureau of Statistics, 2016. Statistical Communiqué of China on  
261 2015 National Economic and Social Development. Retrieved from:  
262 [http://www.stats.gov.cn/tjsj/zxfb/201602/t20160229\\_1323991.html](http://www.stats.gov.cn/tjsj/zxfb/201602/t20160229_1323991.html) .
- 263 15. Wang N, Shao H, Chen Y, et al. Follicle-Stimulating Hormone, Its Association with  
264 Cardiometabolic Risk Factors, and 10-Year Risk of Cardiovascular Disease in  
265 Postmenopausal Women. *J Am Heart Assoc.* 2017;6. pii: e005918.
- 266 16. Cai Z, Xu X, Wu X, et al. Hyperuricemia and the metabolic syndrome in Hangzhou. *Asia  
267 Pac J Clin Nutr.* 2009;18:81-7.
- 268 17. American Diabetes Association. Diagnosis and classification of diabetes mellitus.  
269 *Diabetes Care.* 2010; 33: S62–S69.
- 270 18. Xu Y, Wang L, He J, et al. Prevalence and control of diabetes in Chinese adults. *JAMA.*  
271 2013;310:948-59.
- 272 19. Liu R, Han C, Wu D, et al. Prevalence of Hyperuricemia and Gout in Mainland China  
273 from 2000 to 2014: A Systematic Review and Meta-Analysis. *Biomed Res Int.*  
274 2015;2015:762820.
- 275 20. Dong Y, Nan H, Gao W. Prevalence of the metabolic syndrome among adults aged  
276 20–74 years in Zhanshan community of Qingdao. *Chinese Journal of Diabetes.*  
277 2004;12:177-81.
- 278 21. Nagahama K, Iseki K, Inoue T, et al. Hyperuricemia and cardiovascular risk factor  
279 clustering in a screened cohort in Okinawa, Japan. *Hypertens Res.* 2004;27(4):227-33.
- 280 22. Yang J, Liu Z, Zhang C, et al. The prevalence of hyperuricemia and its correlates in an  
281 inland Chinese adult population, urban and rural of Jinan. *Rheumatol Int.*  
282 2013;33:1511-7.
- 283 23. Miao Z, Li C, Chen Y, et al. Dietary and lifestyle changes associated with high  
284 prevalence of hyperuricemia and gout in the Shandong coastal cities of Eastern China. *J  
285 Rheumatol.* 2008;35:1859-64.
- 286 24. NCD Risk Factor Collaboration (NCD-RisC). Trends in adult body-mass index in 200  
287 countries from 1975 to 2014: a pooled analysis of 1698 population-based measurement  
288 studies with 19·2 million participants. *Lancet.* 2016;387:1377-96.
- 289 25. Lim JH, Kim YK, Kim YS, et al. Relationship between serum uric Acid levels,

- 1  
2  
3  
4 290 metabolic syndrome, and arterial stiffness in Korean. *Korean Circ J.* 2010;40:314-20.
- 5  
6 291 26. Lin SD, Tsai DH, Hsu SR. Association between serum uric acid level and components of  
7  
8 292 the metabolic syndrome. *J Chin Med Assoc.* 2006;69:512-6.
- 9  
10 293 27. Yoo TW, Sung KC, Shin HS, et al. Relationship between serum uric acid concentration  
11  
12 294 and insulin resistance and metabolic syndrome. *Circ J.* 2005;69:928-33.
- 13  
14 295 28. Krishnan E, Pandya BJ, Chung L, et al. Hyperuricemia in young adults and risk of  
15  
16 296 insulin resistance, prediabetes, and diabetes: a 15-year follow-up study. *Am J Epidemiol.*  
17  
18 297 2012;176:108-16.
- 19  
20 298 29. Li C, Hsieh MC, Chang SJ. Metabolic syndrome, diabetes, and hyperuricemia. *Curr Opin*  
21  
22 299 *Rheumatol.* 2013;25:210-6.
- 23  
24  
25  
26  
27  
28  
29  
30  
31  
32  
33  
34  
35  
36  
37  
38  
39  
40  
41  
42  
43  
44  
45  
46  
47  
48  
49  
50  
51  
52  
53  
54  
55  
56  
57  
58  
59  
60

1  
2  
3  
4  
5  
6  
7  
8  
9  
10  
11  
12  
13  
14  
15  
16  
17  
18  
19  
20  
21  
22  
23  
24  
25  
26  
27  
28  
29  
30  
31  
32  
33  
34  
35  
36  
37  
38  
39  
40  
41  
42  
43  
44  
45  
46  
47  
48  
49  
50  
51  
52  
53  
54  
55  
56  
57  
58  
59  
60

300 **Figure legend**

301 **Fig. 1** Flowchart of this study.

302 We totally collected 12, 770 subjects. After excluding participants who had missing data.

303 Finally, 9, 225 subjects were included

304 **Table 1** Baseline characteristics between different groups.

| Variables             | Men (n=3682) | Women (n=5543) | P value |
|-----------------------|--------------|----------------|---------|
| Age y                 | 55.57±13.23  | 54.30±12.82    | 0.000   |
| FPS mmol/L            | 5.72±1.63    | 5.50±1.36      | 0.000   |
| HbA1c %               | 5.78±1.08    | 5.64±0.92      | 0.000   |
| TG mmol/L             | 1.88±1.79    | 1.55±1.20      | 0.000   |
| TC mmol/L             | 5.14±1.13    | 5.27±1.15      | 0.000   |
| LDL mmol/L            | 3.23±0.77    | 3.30±0.83      | 0.000   |
| HDL mmol/L            | 1.30±0.31    | 1.45±0.32      | 0.000   |
| Uric acid umol/L      | 352.12±79.30 | 269.29±64.68   | 0.000   |
| BMI kg/m <sup>2</sup> | 25.11±3.45   | 24.40±3.67     | 0.000   |
| WC cm                 | 85.85±9.42   | 78.72±9.90     | 0.000   |
| SBP mmHg              | 134.31±20.71 | 131.12±22.22   | 0.000   |
| DBP mmHg              | 82.12±12.90  | 77.77±12.93    | 0.000   |
| Diabetes %            | 16.3%        | 12.7%          | 0.000   |
| Hypertension %        | 53.4%        | 44.1%          | 0.000   |

305 Fasting plasma glucose: FPG; Alanine aminotransferase: ALT; Triglycerides: TG; Total  
 306 cholesterol: TC; Body mass index: BMI; Waist circumference: WC; Systolic blood pressure: SBP;  
 307 Diastolic blood pressure: DBP

1  
2  
3  
4  
5  
6  
7  
8  
9  
10  
11  
12  
13  
14  
15  
16  
17  
18  
19  
20  
21  
22  
23  
24  
25  
26  
27  
28  
29  
30  
31  
32  
33  
34  
35  
36  
37  
38  
39  
40  
41  
42  
43  
44  
45  
46

**Table 2** Characteristics of Eastern Chinese population.

|                 | % (95%CI)         |                   |                   |                   | Mean (95%CI)         |                         |                      |
|-----------------|-------------------|-------------------|-------------------|-------------------|----------------------|-------------------------|----------------------|
|                 | Diabetes          | Hypertension      | Smoking           | Drinking          | WC                   | SBP                     | BMI                  |
| Overall         | 14.1 (13.4, 14.8) | 47.8 (46.8, 48.9) | 19.2 (18.3, 20.0) | 55.8 (54.8, 56.9) | 81.58 (81.37, 81.79) | 132.38 (131.93, 132.83) | 24.69 (24.62, 24.77) |
| Location        |                   |                   |                   |                   |                      |                         |                      |
| Rural           | 15.8 (14.4, 17.2) | 58.7 (56.8, 60.6) | 22.9 (21.3, 24.5) | 56.6 (54.7, 58.5) | 83.14 (82.75, 83.54) | 139.74 (138.86, 140.63) | 24.71 (24.57, 24.85) |
| Urban           | 13.4 (12.6, 14.2) | 43.3 (42.1, 44.5) | 17.6 (16.7, 18.6) | 55.5 (54.3, 56.7) | 80.90 (80.65, 81.16) | 129.35 (128.85, 129.84) | 24.67 (24.59, 24.76) |
| Age groups      |                   |                   |                   |                   |                      |                         |                      |
| <40             | 1.6 (0.9, 2.3)    | 11.1 (9.4, 12.9)  | 12.9 (11.0, 14.8) | 42.0 (39.2, 44.7) | 75.22 (74.63, 75.82) | 116.83 (115.99, 117.67) | 23.38 (23.18, 23.58) |
| 40-50           | 5.9 (4.8, 7.0)    | 31.6 (29.4, 33.7) | 17.1 (15.3, 18.9) | 53.2 (50.9, 55.6) | 78.95 (78.48, 79.42) | 125.59 (124.71, 126.46) | 24.56 (24.41, 24.72) |
| 50-60           | 15.3 (13.8, 16.7) | 49.4 (47.4, 51.4) | 23.5 (21.8, 25.2) | 56.2 (54.2, 58.2) | 82.14 (81.76, 82.52) | 132.39 (131.57, 133.21) | 25.02 (24.88, 25.15) |
| 60-70           | 20.3 (18.8, 21.9) | 62.3 (60.4, 64.2) | 19.5 (17.9, 21.0) | 61.5 (59.6, 63.4) | 84.00 (83.63, 84.36) | 138.84 (138.00, 139.68) | 25.06 (24.91, 25.21) |
| >70             | 24.4 (21.9, 26.9) | 78.5 (76.0, 80.9) | 19.1 (16.7, 21.5) | 61.6 (58.7, 64.6) | 86.02 (85.42, 86.62) | 146.05 (144.81, 147.29) | 24.73 (24.51, 24.95) |
| Economic status |                   |                   |                   |                   |                      |                         |                      |
| low             | 12.3 (11.3, 13.3) | 47.8 (46.3, 49.4) | 21.2 (19.9, 22.5) | 46.6 (45.1, 48.2) | 81.07 (80.74, 81.39) | 134.20 (133.47, 134.93) | 24.50 (24.39, 24.61) |
| high            | 15.6 (14.6, 16.6) | 47.8 (46.4, 49.2) | 17.6 (16.5, 18.6) | 62.9 (61.6, 64.3) | 81.96 (81.68, 82.24) | 130.97 (130.42, 131.52) | 24.83 (24.73, 24.93) |
| BMI             |                   |                   |                   |                   |                      |                         |                      |
| <25             | 10.5 (9.7, 11.3)  | 38.0 (36.7, 39.4) | 17.3 (16.3, 18.4) | 54.1 (52.7, 55.5) | 76.16 (75.94, 76.39) | 128.30 (127.72, 128.89) | 22.28 (22.23, 22.33) |
| 25-29.9         | 17.7 (16.4, 19.0) | 57.9 (56.2, 59.6) | 20.7 (19.3, 22.1) | 57.9 (56.2, 59.6) | 87.24 (86.99, 87.50) | 136.79 (136.06, 137.51) | 26.98 (26.94, 27.03) |
| >=30            | 26.2 (22.6, 29.7) | 73.1 (69.6, 76.7) | 24.6 (21.1, 28.1) | 59.0 (55.0, 62.9) | 96.39 (95.64, 97.15) | 142.00 (140.43, 143.57) | 32.51 (32.21, 32.81) |
| Glucose status  |                   |                   |                   |                   |                      |                         |                      |
| normal          | -                 | 37.0 (35.6, 38.3) | 16.2 (15.1, 17.2) | 50.6 (49.3, 52.0) | 78.95 (78.68, 79.22) | 127.98 (127.42, 128.55) | 24.08 (23.99, 24.18) |

1  
2  
3  
4  
5  
6  
7  
8  
9  
10  
11  
12  
13  
14  
15  
16  
17  
18  
19  
20  
21  
22  
23  
24  
25  
26  
27  
28  
29  
30  
31  
32  
33  
34  
35  
36  
37  
38  
39  
40  
41  
42  
43  
44  
45  
46

---

|             |   |                   |                   |                   |                      |                         |                      |
|-------------|---|-------------------|-------------------|-------------------|----------------------|-------------------------|----------------------|
| prediabetes | - | 57.6 (55.7, 59.5) | 23.4 (21.7, 25.0) | 63.2 (61.3, 65.1) | 83.90 (83.52, 84.27) | 136.70 (135.85, 137.54) | 25.26 (25.12, 25.40) |
| diabetes    | - | 72.7 (70.3, 75.2) | 23.0 (20.6, 25.3) | 61.3 (58.7, 64.0) | 87.60 (87.05, 88.15) | 141.93 (140.76, 143.09) | 26.00 (25.80, 26.21) |

---

1  
2  
3  
4  
5  
6  
7  
8  
9  
10  
11  
12  
13  
14  
15  
16  
17  
18  
19  
20  
21  
22  
23  
24  
25  
26  
27  
28  
29  
30  
31  
32  
33  
34  
35  
36  
37  
38  
39  
40  
41  
42  
43  
44  
45  
46

**Table 3** Biochemical index of Eastern Chinese population.

|                 | Mean (95%CI)            |                   |                   |                   |                   |                   |                   |                      |
|-----------------|-------------------------|-------------------|-------------------|-------------------|-------------------|-------------------|-------------------|----------------------|
|                 | UA                      | LDL               | TG                | HDL               | TC                | FPG               | HbA1c             | Cr                   |
| Overall         | 301.84 (300.14, 303.53) | 3.28 (3.26, 3.29) | 1.68 (1.65, 1.71) | 1.39 (1.38, 1.39) | 5.22 (5.19, 5.24) | 5.59 (5.56, 5.62) | 5.70 (5.67, 5.72) | 77.35 (77.04, 77.65) |
| Location        |                         |                   |                   |                   |                   |                   |                   |                      |
| Rural           | 294.82 (291.72, 297.92) | 3.38 (3.35, 3.41) | 1.69 (1.63, 1.75) | 1.44 (1.43, 1.45) | 5.37 (5.33, 5.41) | 5.63 (5.57, 5.69) | 5.80 (5.76, 5.84) | 73.76 (73.22, 74.29) |
| Urban           | 305.55 (303.58, 307.53) | 3.23 (3.21, 3.25) | 1.67 (1.64, 1.71) | 1.37 (1.36, 1.37) | 5.16 (5.13, 5.18) | 5.57 (5.53, 5.60) | 5.65 (5.63, 5.67) | 78.87 (78.51, 79.24) |
| Age groups      |                         |                   |                   |                   |                   |                   |                   |                      |
| <40             | 294.08 (289.32, 298.85) | 2.80 (2.77, 2.84) | 1.35 (1.28, 1.42) | 1.39 (1.37, 1.40) | 4.60 (4.55, 4.65) | 4.98 (4.94, 5.02) | 5.09 (5.06, 5.12) | 75.82 (75.00, 76.63) |
| 40-50           | 287.23 (283.32, 291.14) | 3.10 (3.07, 3.13) | 1.68 (1.59, 1.77) | 1.40 (1.39, 1.42) | 5.02 (4.97, 5.07) | 5.33 (5.27, 5.38) | 5.40 (5.36, 5.44) | 75.05 (74.39, 75.71) |
| 50-60           | 305.93 (302.74, 309.12) | 3.43 (3.39, 3.46) | 1.82 (1.76, 1.88) | 1.39 (1.37, 1.40) | 5.42 (5.37, 5.46) | 5.67 (5.60, 5.73) | 5.78 (5.74, 5.82) | 77.17 (76.58, 77.75) |
| 60-70           | 306.36 (303.39, 309.32) | 3.44 (3.41, 3.47) | 1.74 (1.69, 1.79) | 1.38 (1.37, 1.39) | 5.42 (5.37, 5.46) | 5.80 (5.74, 5.86) | 5.95 (5.91, 5.99) | 77.64 (77.08, 78.20) |
| >70             | 318.74 (314.05, 323.43) | 3.37 (3.32, 3.42) | 1.58 (1.53, 1.63) | 1.38 (1.36, 1.40) | 5.34 (5.28, 5.40) | 6.00 (5.90, 6.10) | 6.06 (6.00, 6.12) | 82.43 (81.45, 83.40) |
| Economic status |                         |                   |                   |                   |                   |                   |                   |                      |
| low             | 299.75 (297.15, 302.35) | 3.23 (3.20, 3.25) | 1.70 (1.65, 1.75) | 1.45 (1.44, 1.46) | 5.20 (5.17, 5.24) | 5.54 (5.49, 5.58) | 5.62 (5.59, 5.65) | 76.29 (75.82, 76.75) |
| high            | 304.44 (302.28, 306.60) | 3.31 (3.29, 3.34) | 1.66 (1.63, 1.70) | 1.34 (1.33, 1.35) | 5.23 (5.20, 5.26) | 5.62 (5.58, 5.66) | 5.75 (5.72, 5.78) | 78.20 (77.79, 78.60) |
| BMI             |                         |                   |                   |                   |                   |                   |                   |                      |
| <25             | 284.75 (282.68, 286.82) | 3.19 (3.17, 3.21) | 1.44 (1.41, 1.47) | 1.45 (1.44, 1.46) | 5.13 (5.10, 5.16) | 5.42 (5.38, 5.45) | 5.56 (5.53, 5.58) | 76.19 (75.79, 76.58) |
| 25-29.9         | 321.87 (319.05, 324.69) | 3.39 (3.36, 3.42) | 1.94 (1.89, 1.99) | 1.30 (1.29, 1.31) | 5.32 (5.28, 5.36) | 5.74 (5.69, 5.79) | 5.84 (5.80, 5.87) | 78.88 (78.35, 79.42) |
| ≥30             | 339.36 (332.47, 346.25) | 3.44 (3.37, 3.50) | 2.33 (2.11, 2.54) | 1.27 (1.25, 1.29) | 5.40 (5.32, 5.49) | 6.12 (5.96, 6.27) | 6.12 (6.02, 6.21) | 78.32 (77.11, 79.53) |
| Glucose status  |                         |                   |                   |                   |                   |                   |                   |                      |
| normal          | 294.93 (292.74, 297.12) | 3.12 (3.10, 3.14) | 1.54 (1.51, 1.58) | 1.41 (1.40, 1.42) | 5.05 (5.02, 5.08) | 5.09 (5.07, 5.10) | 5.16 (5.15, 5.17) | 76.81 (76.41, 77.21) |

---

|             |                         |                   |                   |                   |                   |                   |                   |                      |
|-------------|-------------------------|-------------------|-------------------|-------------------|-------------------|-------------------|-------------------|----------------------|
| prediabetes | 313.08 (309.95, 316.22) | 3.51 (3.48, 3.54) | 1.71 (1.66, 1.75) | 1.38 (1.37, 1.40) | 5.49 (5.44, 5.53) | 5.45 (5.42, 5.48) | 5.93 (5.92, 5.94) | 77.95 (77.38, 78.52) |
| diabetes    | 310.93 (306.50, 315.36) | 3.42 (3.38, 3.47) | 2.18 (2.06, 2.30) | 1.29 (1.27, 1.31) | 5.38 (5.31, 5.45) | 7.89 (7.75, 8.04) | 7.38 (7.30, 7.46) | 78.22 (77.33, 79.12) |

---



**Table 4** Estimated prevalence of HUA in Eastern Chinese population.

|                 | % (95%CI)         |                  |                  |
|-----------------|-------------------|------------------|------------------|
|                 | Overall           | Men              | Women            |
| Overall         | 12.3 (11.6, 12.9) | 17.9 (16.7-19.1) | 8.5 (7.8-9.3)    |
| Location        |                   |                  |                  |
| Urban           | 12.9 (12.1, 13.7) | 19.1 (17.6-20.7) | 8.9 (8.0-9.8)    |
| Rural           | 10.8 (9.6, 12.0)  | 15.2 (13.1-17.3) | 7.7 (6.4-9.0)    |
| Age groups      |                   |                  |                  |
| <40             | 10.8 (9.0-12.5)   | 22.8 (19.0-26.6) | 3.3 (2.0-4.5)    |
| 40-50           | 9.0 (7.6-10.3)    | 19.3 (16.3-22.3) | 3.1 (2.1-4.1)    |
| 50-60           | 12.9 (11.6-14.3)  | 18.6 (16.1-21.0) | 9.2 (7.7-10.6)   |
| 60-70           | 13.1 (11.8-14.4)  | 15.3 (13.1-17.5) | 11.6 (10.0-13.2) |
| >70             | 15.9 (13.8-18.0)  | 15.6 (12.5-18.7) | 16.1 (13.2-19.1) |
| Economic status |                   |                  |                  |
| low             | 11.8 (10.9-12.8)  | 18.3 (16.5-20.1) | 7.2 (6.1-8.2)    |
| high            | 12.6 (11.7-13.5)  | 17.5 (15.8-19.2) | 9.5 (8.5-10.6)   |
| BMI             |                   |                  |                  |
| <25             | 7.8 (7.0-8.5)     | 12.4 (10.9-13.9) | 5.2 (4.5-6.0)    |
| 25-29.9         | 16.4 (15.1-17.7)  | 22.0 (19.9-24.1) | 11.6 (10.1-13.1) |
| ≥30             | 25.9 (22.4-29.4)  | 30.2 (24.6-35.8) | 22.5 (18.1-27.0) |
| Glucose status  |                   |                  |                  |
| normal          | 10.1 (9.3-10.9)   | 17.5 (15.8-19.2) | 5.7 (4.9-6.5)    |
| prediabetes     | 15.2 (13.9-16.6)  | 20.3 (17.9-22.7) | 11.6 (10.0-13.2) |
| diabetes        | 15.1 (13.1-17.0)  | 15.0 (12.1-17.8) | 15.2 (12.5-17.9) |

**Table 5** Risk factors for HUA in Eastern Chinese population.

| Risk factors                    | OR    | (95%CI)      |
|---------------------------------|-------|--------------|
| Female sex                      | 0.502 | 0.420, 0.599 |
| Age per 10 years                | 1.039 | 0.974, 1.109 |
| Urban residency                 | 2.208 | 1.674, 2.913 |
| ≥Junior middle school education | 1.050 | 0.873, 1.263 |
| Lipids                          |       |              |
| LDL per 1SD                     | 1.033 | 0.900, 1.185 |
| HDL per 1SD                     | 0.925 | 0.840, 1.019 |
| TC per 1SD                      | 1.218 | 1.043, 1.422 |
| TG per 1SD                      | 1.701 | 1.517, 1.906 |
| Current smoking                 | 0.941 | 0.777, 1.139 |
| Current drinking                | 0.916 | 0.787, 1.066 |
| BMI                             |       |              |
| Overweight                      | 1.770 | 1.509, 2.075 |
| Obesity                         | 3.035 | 2.385, 3.862 |
| Blood pressure                  |       |              |
| SBP per 10mmHg                  | 1.059 | 1.013, 1.108 |
| DBP per 10mmHg                  | 1.011 | 0.943, 1.084 |
| High economic status            | 0.693 | 0.543, 0.886 |

Data are expressed as unStandardized B (95%CI). The enter procedure was used.

1  
2  
3  
4  
5  
6  
7  
8  
9  
10  
11  
12  
13  
14  
15  
16  
17  
18  
19  
20  
21  
22  
23  
24  
25  
26  
27  
28  
29  
30  
31  
32  
33  
34  
35  
36  
37  
38  
39  
40  
41  
42  
43  
44  
45  
46  
47  
48  
49  
50  
51  
52  
53  
54  
55  
56  
57  
58  
59  
60

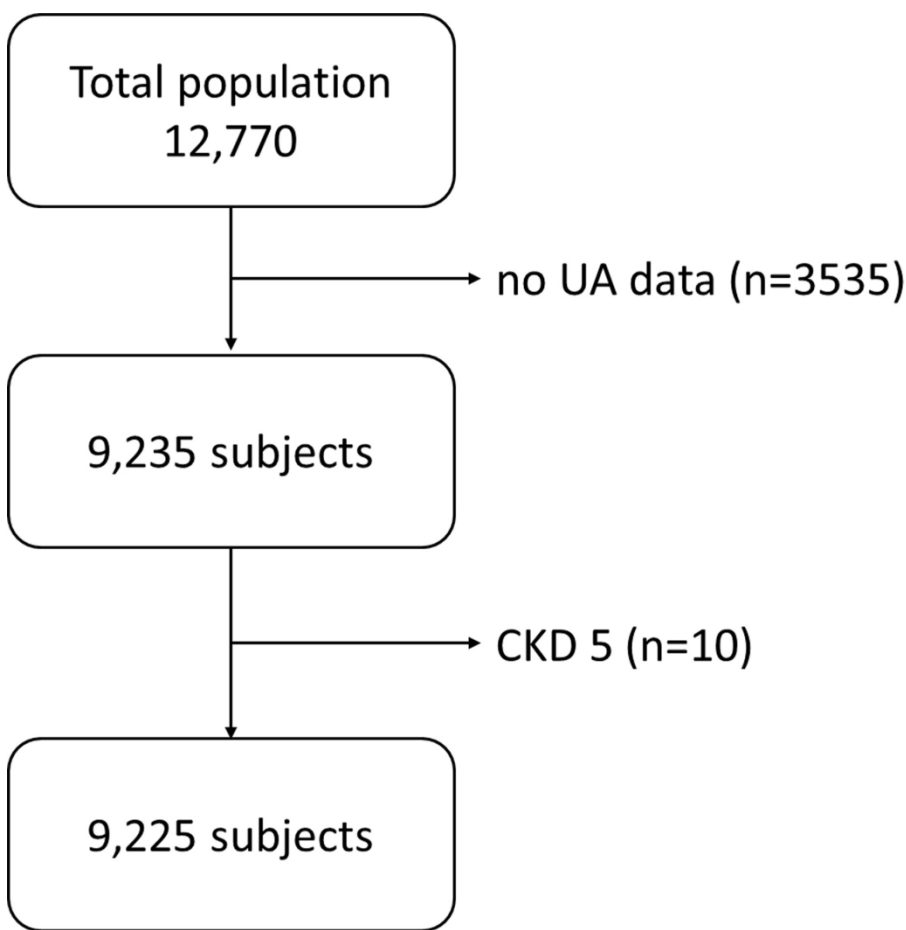

171x157mm (300 x 300 DPI)

**STROBE Statement**

## Checklist of items that should be included in reports of observational studies

| Section/Topic             | Item No | Recommendation                                                                                                                                                                             | Reported on Page No |
|---------------------------|---------|--------------------------------------------------------------------------------------------------------------------------------------------------------------------------------------------|---------------------|
| <b>Title and abstract</b> | 1       | (a) Indicate the study's design with a commonly used term in the title or the abstract                                                                                                     | 2                   |
|                           |         | (b) Provide in the abstract an informative and balanced summary of what was done and what was found                                                                                        | 2                   |
| <b>Introduction</b>       |         |                                                                                                                                                                                            |                     |
| Background/rationale      | 2       | Explain the scientific background and rationale for the investigation being reported                                                                                                       | 6                   |
| Objectives                | 3       | State specific objectives, including any prespecified hypotheses                                                                                                                           | 6                   |
| <b>Methods</b>            |         |                                                                                                                                                                                            |                     |
| Study design              | 4       | Present key elements of study design early in the paper                                                                                                                                    | 7                   |
| Setting                   | 5       | Describe the setting, locations, and relevant dates, including periods of recruitment, exposure, follow-up, and data collection                                                            | 7                   |
| Participants              | 6       | (a) <i>Cohort study</i> —Give the eligibility criteria, and the sources and methods of selection of participants. Describe methods of follow-up                                            | 7                   |
|                           |         | <i>Case-control study</i> —Give the eligibility criteria, and the sources and methods of case ascertainment and control selection. Give the rationale for the choice of cases and controls |                     |
|                           |         | <i>Cross-sectional study</i> —Give the eligibility criteria, and the sources and methods of selection of participants                                                                      |                     |
| Variables                 | 7       | (b) <i>Cohort study</i> —For matched studies, give matching criteria and number of exposed and unexposed                                                                                   | 7                   |
|                           |         | <i>Case-control study</i> —For matched studies, give matching criteria and the number of controls per case                                                                                 | 7,8                 |
| Data sources/measurement  | 8*      | Clearly define all outcomes, exposures, predictors, potential confounders, and effect modifiers. Give diagnostic criteria, if applicable                                                   | 7,8                 |
| Bias                      | 9       | For each variable of interest, give sources of data and details of methods of assessment (measurement). Describe comparability of assessment methods if there is more than one group       | 7                   |
| Study size                | 10      | Describe any efforts to address potential sources of bias                                                                                                                                  | 7                   |
| Quantitative variables    | 11      | Explain how the study size was arrived at                                                                                                                                                  | 8                   |
| Statistical methods       | 12      | Explain how quantitative variables were handled in the analyses. If applicable, describe which groupings were chosen and why                                                               | 8                   |
|                           |         | (a) Describe all statistical methods, including those used to control for confounding                                                                                                      | 8                   |
|                           |         | (b) Describe any methods used to examine subgroups and interactions                                                                                                                        | 8                   |
|                           |         | (c) Explain how missing data were addressed                                                                                                                                                | 7                   |
|                           |         | (d) <i>Cohort study</i> —If applicable, explain how loss to follow-up was addressed                                                                                                        | 8                   |
|                           |         | <i>Case-control study</i> —If applicable, explain how matching of cases and controls was addressed                                                                                         | 8                   |
|                           |         | <i>Cross-sectional study</i> —If applicable, describe analytical methods taking account of sampling strategy                                                                               | 8                   |
|                           |         | (e) Describe any sensitivity analyses                                                                                                                                                      | 8                   |

| Section/Topic            | Item No | Recommendation                                                                                                                                                                                               | Reported on Page No |
|--------------------------|---------|--------------------------------------------------------------------------------------------------------------------------------------------------------------------------------------------------------------|---------------------|
| <b>Results</b>           |         |                                                                                                                                                                                                              |                     |
| Participants             | 13*     | (a) Report numbers of individuals at each stage of study—eg numbers potentially eligible, examined for eligibility, confirmed eligible, included in the study, completing follow-up, and analysed            | 7                   |
|                          |         | (b) Give reasons for non-participation at each stage                                                                                                                                                         | 7                   |
|                          |         | (c) Consider use of a flow diagram                                                                                                                                                                           | 7                   |
| Descriptive data         | 14*     | (a) Give characteristics of study participants (eg demographic, clinical, social) and information on exposures and potential confounders                                                                     | 9                   |
|                          |         | (b) Indicate number of participants with missing data for each variable of interest                                                                                                                          | 7                   |
|                          |         | (c) <i>Cohort study</i> —Summarise follow-up time (eg, average and total amount)                                                                                                                             |                     |
| Outcome data             | 15*     | <i>Cohort study</i> —Report numbers of outcome events or summary measures over time                                                                                                                          |                     |
|                          |         | <i>Case-control study</i> —Report numbers in each exposure category, or summary measures of exposure                                                                                                         |                     |
|                          |         | <i>Cross-sectional study</i> —Report numbers of outcome events or summary measures                                                                                                                           | 9                   |
| Main results             | 16      | (a) Give unadjusted estimates and, if applicable, confounder-adjusted estimates and their precision (eg, 95% confidence interval). Make clear which confounders were adjusted for and why they were included | 9                   |
|                          |         | (b) Report category boundaries when continuous variables were categorized                                                                                                                                    | 9                   |
|                          |         | (c) If relevant, consider translating estimates of relative risk into absolute risk for a meaningful time period                                                                                             |                     |
| Other analyses           | 17      | Report other analyses done—eg analyses of subgroups and interactions, and sensitivity analyses                                                                                                               | 9                   |
| <b>Discussion</b>        |         |                                                                                                                                                                                                              |                     |
| Key results              | 18      | Summarise key results with reference to study objectives                                                                                                                                                     | 10                  |
| Limitations              | 19      | Discuss limitations of the study, taking into account sources of potential bias or imprecision. Discuss both direction and magnitude of any potential bias                                                   | 11                  |
| Interpretation           | 20      | Give a cautious overall interpretation of results considering objectives, limitations, multiplicity of analyses, results from similar studies, and other relevant evidence                                   | 10                  |
| Generalisability         | 21      | Discuss the generalisability (external validity) of the study results                                                                                                                                        | 10                  |
| <b>Other Information</b> |         |                                                                                                                                                                                                              |                     |
| Funding                  | 22      | Give the source of funding and the role of the funders for the present study and, if applicable, for the original study on which the present article is based                                                | 2                   |

\*Give information separately for cases and controls in case-control studies and, if applicable, for exposed and unexposed groups in cohort and cross-sectional studies.

**Note:** An Explanation and Elaboration article discusses each checklist item and gives methodological background and published examples of transparent reporting. The STROBE checklist is best used in conjunction with this article (freely available on the Web sites of PLoS Medicine at <http://www.plosmedicine.org/>, Annals of Internal Medicine at <http://www.annals.org/>, and Epidemiology at <http://www.epidem.com/>). Information on the STROBE Initiative is available at [www.strobe-statement.org](http://www.strobe-statement.org).

# BMJ Open

## Prevalence of hyperuricemia in an eastern Chinese population: a cross-sectional study

|                                 |                                                                                                                                                                                                                                                                                                                                                                                                                                                                                                                                                                                                                                                                                                                                                                                 |
|---------------------------------|---------------------------------------------------------------------------------------------------------------------------------------------------------------------------------------------------------------------------------------------------------------------------------------------------------------------------------------------------------------------------------------------------------------------------------------------------------------------------------------------------------------------------------------------------------------------------------------------------------------------------------------------------------------------------------------------------------------------------------------------------------------------------------|
| Journal:                        | <i>BMJ Open</i>                                                                                                                                                                                                                                                                                                                                                                                                                                                                                                                                                                                                                                                                                                                                                                 |
| Manuscript ID                   | bmjopen-2019-035614.R1                                                                                                                                                                                                                                                                                                                                                                                                                                                                                                                                                                                                                                                                                                                                                          |
| Article Type:                   | Original research                                                                                                                                                                                                                                                                                                                                                                                                                                                                                                                                                                                                                                                                                                                                                               |
| Date Submitted by the Author:   | 11-Feb-2020                                                                                                                                                                                                                                                                                                                                                                                                                                                                                                                                                                                                                                                                                                                                                                     |
| Complete List of Authors:       | Han, Bing; Shanghai 9th Peoples Hospital Affiliated to Shanghai Jiaotong University School of Medicine<br>Wang, Ningjian; Shanghai 9th Peoples Hospital Affiliated to Shanghai Jiaotong University School of Medicine<br>Chen, Yi; Shanghai 9th Peoples Hospital Affiliated to Shanghai Jiaotong University School of Medicine<br>Li, Qin; Shanghai 9th Peoples Hospital Affiliated to Shanghai Jiaotong University School of Medicine<br>Zhu, Chunfang ; Shanghai 9th Peoples Hospital Affiliated to Shanghai Jiaotong University School of Medicine<br>Chen, Yingchao; Shanghai 9th Peoples Hospital Affiliated to Shanghai Jiaotong University School of Medicine<br>Lu, Yingli; Shanghai 9th Peoples Hospital Affiliated to Shanghai Jiaotong University School of Medicine |
| <b>Primary Subject Heading</b>: | Diabetes and endocrinology                                                                                                                                                                                                                                                                                                                                                                                                                                                                                                                                                                                                                                                                                                                                                      |
| Secondary Subject Heading:      | Epidemiology                                                                                                                                                                                                                                                                                                                                                                                                                                                                                                                                                                                                                                                                                                                                                                    |
| Keywords:                       | General endocrinology < DIABETES & ENDOCRINOLOGY, EPIDEMIOLOGY, Diabetes & endocrinology < INTERNAL MEDICINE                                                                                                                                                                                                                                                                                                                                                                                                                                                                                                                                                                                                                                                                    |
|                                 |                                                                                                                                                                                                                                                                                                                                                                                                                                                                                                                                                                                                                                                                                                                                                                                 |

SCHOLARONE™  
Manuscripts



I, the Submitting Author has the right to grant and does grant on behalf of all authors of the Work (as defined in the below author licence), an exclusive licence and/or a non-exclusive licence for contributions from authors who are: i) UK Crown employees; ii) where BMJ has agreed a CC-BY licence shall apply, and/or iii) in accordance with the terms applicable for US Federal Government officers or employees acting as part of their official duties; on a worldwide, perpetual, irrevocable, royalty-free basis to BMJ Publishing Group Ltd ("BMJ") its licensees and where the relevant Journal is co-owned by BMJ to the co-owners of the Journal, to publish the Work in this journal and any other BMJ products and to exploit all rights, as set out in our [licence](#).

The Submitting Author accepts and understands that any supply made under these terms is made by BMJ to the Submitting Author unless you are acting as an employee on behalf of your employer or a postgraduate student of an affiliated institution which is paying any applicable article publishing charge ("APC") for Open Access articles. Where the Submitting Author wishes to make the Work available on an Open Access basis (and intends to pay the relevant APC), the terms of reuse of such Open Access shall be governed by a Creative Commons licence – details of these licences and which [Creative Commons](#) licence will apply to this Work are set out in our licence referred to above.

Other than as permitted in any relevant BMJ Author's Self Archiving Policies, I confirm this Work has not been accepted for publication elsewhere, is not being considered for publication elsewhere and does not duplicate material already published. I confirm all authors consent to publication of this Work and authorise the granting of this licence.

1  
2  
3 **1 Prevalence of hyperuricemia in an eastern Chinese population: a cross-sectional**  
4 **2 study**

5  
6  
7 3 Bing Han\*, Ningjian Wang, Yi Chen, Qin Li, Chunfang Zhu, Yingchao Chen and Yingli Lu\*

8  
9  
10 4 Institute and Department of Endocrinology and Metabolism, Shanghai Ninth People's  
11 5 Hospital Affiliated to Shanghai Jiaotong University School of Medicine, Shanghai, China

12  
13 6  
14  
15  
16 7 Correspondance: Dr Yingli Lu, luyingli2008@126.com and Bing Han,  
17 8 hanbing1423@163.com.

18  
19  
20 9 Running title: Prevalence of hyperuricemia in China.  
21  
22  
23  
24  
25  
26  
27  
28  
29  
30  
31  
32  
33  
34  
35  
36  
37  
38  
39  
40  
41  
42  
43  
44  
45  
46  
47  
48  
49  
50  
51  
52  
53  
54  
55  
56  
57  
58  
59  
60



1  
2  
3  
4  
5  
6  
7  
8  
9  
10  
11  
12  
13  
14  
15  
16  
17  
18  
19  
20  
21  
22  
23  
24  
25  
26  
27  
28  
29  
30  
31  
32  
33  
34  
35  
36  
37  
38  
39  
40  
41  
42  
43  
44  
45  
46  
47  
48  
49  
50  
51  
52  
53  
54  
55  
56  
57  
58  
59  
60**10 Statement of authorship**

11 The work has not been published previously, and not under consideration for publication  
12 elsewhere. All authors have reviewed and approved the final version.

**13 The author contribution lists**

14 YL, BH designed and supervised this investigation. BH performed this investigation. YC,  
15 CFZ and YCC contributed to the data collection. NJW and QL provided technical or material  
16 support. All authors read and approved the final manuscript.

**17 Data Sharing Statement**

18 Please contact to corresponding author.

**19 Conflict of interests**

20 The authors have declared that no competing interests exist.

**21 Acknowledgments**

22 We thank all the participants in the study.

**23 Compliance with Ethical Standards**

24 All procedures performed in this study were in accordance with the principles of the Helsinki  
25 Declaration II.

**26 Funding**

27 This study was supported by National Natural Science Foundation of China (91857117,  
28 81670717); Science and Technology Commission of Shanghai Municipality (19140902400,  
29 18410722300); the Major Science and Technology Innovation Program of Shanghai  
30 Municipal Education Commission (2019-01-07-00-01-E00059); Commission of Health and  
31 Family Planning of Pudong District (PWZxq2017-17); Municipal Human Resources  
32 Development Program for Outstanding Young Talents in Medical and Health Sciences in  
33 Shanghai (2017YQ053); Shanghai JiaoTong University School of Medicine (19XJ11007).

34 The funders played no role in the design or conduct of the study, collection, management,  
35 analysis, or interpretation of data or in the preparation, review, or approval of the article.

**36 Ethical approval**

37 The study protocol was approved by the Institutional Review Board of the Shanghai Ninth  
38 People's Hospital affiliated with Shanghai Jiaotong University School of Medicine.

**39 Informed consent**

- 1  
2  
3  
4 40 Written consent was obtained from all the participants.  
5  
6 41 **Patient and public involvement:**  
7  
8 42 Patients and the public were not involved in this study.  
9  
10  
11  
12  
13  
14  
15  
16  
17  
18  
19  
20  
21  
22  
23  
24  
25  
26  
27  
28  
29  
30  
31  
32  
33  
34  
35  
36  
37  
38  
39  
40  
41  
42  
43  
44  
45  
46  
47  
48  
49  
50  
51  
52  
53  
54  
55  
56  
57  
58  
59  
60

1  
2  
3  
4 43 **ABSTRACT**

5 44 **Objectives:** In the past decade, China has been characterized by large-scale urbanization as  
6  
7 45 well as rapid economic growth. The aim of this study was to further investigate the  
8  
9 46 prevalence of hyperuricemia (HUA) in an eastern Chinese population.

10  
11 47 **Design:** Cross-sectional study.

12  
13 48 **Setting:** Survey of Prevalence in East China of Metabolic Diseases and Risk Factors  
14  
15 49 (SPECT-China) study.

16  
17 50 **Participants:** In this study, 12,770 residents from 22 sites in eastern China were recruited.  
18  
19 51 Finally, 9,225 subjects were included.

20  
21 52 **Main outcome measures:** The serum levels of uric acid, fasting plasma glucose (FPG),  
22  
23 53 glycated hemoglobin (HbA1c) and other metabolic parameters were tested. Waist  
24  
25 54 circumference (WC), weight, height and blood pressure were also measured. Questionnaires  
26  
27 55 regarding smoking, drinking, education, etc., were collected from the subjects.

28  
29 56 **Results:** The prevalence of HUA in this eastern Chinese population was 11.3% (9.9, 12.7)  
30  
31 57 overall, 20.7% (17.7, 23.7) in men and 5.6% (4.3, 6.7) in women. The prevalence of HUA in  
32  
33 58 urban subjects was higher than that in rural subjects (12.9 vs. 10.8%,  $P<0.01$ ). The prevalence  
34  
35 59 of HUA was negatively and positively associated with age in men and women, respectively.  
36  
37 60 Residents with high body mass index (BMI) levels had a higher prevalence of HUA. In the  
38  
39 61 logistic regression analysis, male sex, urban residency, total cholesterol (TC), triglyceride  
40  
41 62 (TG), overweight, obesity, systolic blood pressure (SBP) and low economic status were  
42  
43 63 independently correlated with HUA.

44  
45 64 **Conclusions:** The estimated prevalence of HUA in this eastern Chinese population was  
46  
47 65 11.3% (9.9, 12.7) overall and 20.7% (17.7, 23.7) and 5.6% (4.3, 6.7) in men and women,  
48  
49 66 respectively. HUA has gradually become an important public health issue in China.

50  
51 67 **Trial registration:** ChiCTR-ECS-14005052.

52  
53 68 **Keywords:** Prevalence, hyperuricemia, economic growth, public health, risk factors  
54  
55  
56  
57  
58  
59  
60

1  
2  
3  
4 **69 Strengths and limitations of this study**

5 70 This is the largest published hyperuricemia study in an eastern Chinese population.

6  
7 71 This study covers residents from 22 sites in five provinces.

8  
9 72 This is a regional survey instead of a national study.

10  
11 73 This is a cross-sectional study that indicated an association between uric acid and other risk  
12 factors.  
13 74

14  
15 75 We do not consider the influence of diet.  
16  
17  
18  
19  
20  
21  
22  
23  
24  
25  
26  
27  
28  
29  
30  
31  
32  
33  
34  
35  
36  
37  
38  
39  
40  
41  
42  
43  
44  
45  
46  
47  
48  
49  
50  
51  
52  
53  
54  
55  
56  
57  
58  
59  
60

1  
2  
3  
4 76 **Abbreviations:** HUA, hyperuricemia; FPG, fasting plasma glucose; WC; waist  
5  
6 77 circumference; BMI, body mass index; LDL, low-density lipoprotein; TG, triglyceride; HDL,  
7  
8 78 high-density lipoprotein; TC, total cholesterol; HbA1c, Glycated hemoglobin; SBP, systolic  
9  
10 79 blood pressure; DBP, diastolic blood pressure; NAFLD, Nonalcoholic fatty liver disease;  
11  
12 80 CKD, chronic kidney disease; NGT, Normal glucose tolerance; GDP, gross domestic product;  
13  
14 81 HPLC, high-performance liquid chromatography  
15  
16  
17  
18  
19  
20  
21  
22  
23  
24  
25  
26  
27  
28  
29  
30  
31  
32  
33  
34  
35  
36  
37  
38  
39  
40  
41  
42  
43  
44  
45  
46  
47  
48  
49  
50  
51  
52  
53  
54  
55  
56  
57  
58  
59  
60

## 82 Introduction

83 In humans, uric acid (UA) is the end product of purine metabolism and is mainly excreted via  
84 the kidneys. Xanthine oxidoreductase catalyzes two enzymatic reactions, hypoxanthine to  
85 xanthine and xanthine to UA. Several conditions can influence the concentration of serum UA,  
86 including purine-rich food intake, neoplastic disease, cytotoxic drugs, obesity, hypertension,  
87 etc. [1-3].

88 Uric acid is reported to be associated with oxidative stress and inflammation [1, 4]. In  
89 patients with hyperuricemia (HUA), deposition of UA in joints and tissues promotes the  
90 occurrence of gout and chronic nephropathy. HUA has also been reported to be associated  
91 with insulin resistance, nonalcoholic fatty liver disease (NAFLD) [5, 6], metabolic syndrome,  
92 type 2 diabetes, atherosclerosis and coronary heart disease [7-11]. The overall prevalence of  
93 HUA in adults in the United States was 21.4% in 2007-2008 [12]. However, in Chinese adults,  
94 the adjusted prevalence of HUA in 2009-2010 was 8.4% [13]. In an elderly Chinese  
95 population, the overall prevalence of HUA was 13.1% [14]. Liu R et al [15] conducted a  
96 meta-analysis between 2000 and 2014 to determine the prevalence of HUA in mainland China.  
97 The pooled prevalence of HUA was 13.3% (male 19.4% and female 7.9%).

98 In the past decade, China has been characterized by large-scale urbanization. The  
99 percentage of the urban population rose from 18% in 1978 to 56% in 2015 [16]. As serum UA  
100 is closely related to economic development and urbanization [13], it is necessary to  
101 understand the latest prevalence of HUA in China.

102 China is characterized by regional and economic diversity. Eastern China has a relatively  
103 higher economic status than the rest of the country. In the present study, we performed a  
104 cross-sectional survey to investigate the prevalence of HUA and its risk factors in an eastern  
105 Chinese population.

## 106 **Methods**

### 107 **Study population**

108 Data from the current study are from the Survey of Prevalence in East China of Metabolic  
109 Diseases and Risk Factors (SPECT-China), which is a population-based cross-sectional  
110 survey of the prevalence of metabolic diseases and risk factors in eastern China [17]. The  
111 registration number is ChiCTR-ECS-14005052 ([www.chictr.org](http://www.chictr.org)). In this study, 12,770  
112 residents from 22 sites in Shanghai, Zhejiang, Jiangsu, Anhui and Jiangxi provinces were  
113 enrolled from January 2014 to December 2015 (Supplemental Figure 1). The inclusion and  
114 exclusion criteria were described previously [17]. Chinese citizens more than 18 years old  
115 who had lived in their current area for more than 6 months were selected. We excluded  
116 subjects with severe communication problems, acute illness, or an unwillingness to participate.  
117 We also excluded residents who had no UA data (n=3,535) and chronic kidney disease (CKD)  
118 stage 5 (n=10). Finally, 9,225 subjects were included. This study was approved by the ethics  
119 committee of the Shanghai Ninth People's Hospital affiliated with Shanghai Jiaotong  
120 University School of Medicine. Written consent was obtained from all the participants.

### 122 **Measurements and definition**

123 HUA was defined as serum UA >420  $\mu\text{mol/L}$  for men and >360  $\mu\text{mol/L}$  for women [18].  
124 Blood pressure and heart rate were measured with a sphygmomanometer  
125 (TERUMO-Elemano) three times. The mean of the three records was used in the analysis.  
126 Hypertension was defined as a systolic blood pressure (SBP)  $\geq 140$  mmHg or diastolic blood  
127 pressure (DBP)  $\geq 90$  mmHg or any self-reported history of hypertension. Diabetes was  
128 defined as a self-reported history of diabetes or glycated hemoglobin (HbA1c) levels of 6.5%  
129 or more. Prediabetes was defined as HbA1c concentrations between 5.7% and 6.4%. Normal  
130 glucose tolerance (NGT) was defined as an HbA1c less than 5.7% [19]. Weight and height  
131 were measured wearing light clothing and without shoes. Body mass index (BMI) was  
132 calculated as weight (kg)/height squared ( $\text{m}^2$ ). Overweight was defined as  $24 \text{ kg/m}^2 \leq \text{BMI} < 28$   
133  $\text{kg/m}^2$ . Obesity was defined as  $\text{BMI} \geq 28 \text{ kg/m}^2$ . Waist circumference (WC) was measured at  
134 the level of 1 cm above the umbilicus. Demographic information and lifestyle risk factors  
135 were gathered from standard questionnaires by trained staff. Current smoking was defined as

1  
2  
3  
4 136 having smoked at least 100 cigarettes in one's lifetime and currently smoking cigarettes [20].  
5  
6 137 Current drinking was defined as drinking more than once a month. Current economic status  
7  
8 138 was assessed by the gross domestic product (GDP) per capita of 2013 at each study site. The  
9  
10 139 mean national GDP per capita (6807 US dollars from World Bank) in 2013 was considered  
11  
12 140 the cutoff point for economic status.

13  
14 141

#### 15 142 **Assessment of biochemical indexes**

16  
17 143 Venous blood samples were drawn from all participants after fasting for at least 8 hours and  
18  
19 144 immediately centrifuged (2000 rpm for 15 min) at room temperature. Blood samples were  
20  
21 145 stored at -20°C when collected and shipped by air in dry ice to one central laboratory certified  
22  
23 146 by the College of American Pathologists within 2-4 hours of collection. All plasma and serum  
24  
25 147 samples were frozen at -80°C after laboratory testing. Serum UA was analyzed with a  
26  
27 148 Beckman Coulter AU 680 device with the original kit (Brea, California, USA). The validity  
28  
29 149 and accuracy of UA were 6% and 4%, respectively. Other biochemical indexes were analyzed  
30  
31 150 as described previously [21].

32  
33 151

#### 34 152 **Statistical analysis**

35  
36 153 Statistical analysis was performed using IBM SPSS Statistics, Version 22 (IBM Corporation,  
37  
38 154 Armonk, New York). Demographic and metabolic characteristics are expressed as the mean ±  
39  
40 155 SD for continuous variables and percentages (95% CI) for categorical variables in the overall  
41  
42 156 population and in subgroups of location, age, economic status, BMI and glucose status.  
43  
44 157 Logistic analysis was used to investigate the association of demographic, lifestyle, and  
45  
46 158 metabolic factors with the odds of HUA. According to the 6th national population census data,  
47  
48 159 the proportions of the population in different age groups (<40, 40-60, ≥60) are 57.39%,  
49  
50 160 29.29%, and 13.31% (total); 58.10%, 29.13%, and 12.76% (male); and 56.61%, 29.46%, and  
51  
52 161 13.91% (female), respectively (<http://www.stats.gov.cn/tjsj/pcsj/rkpc/6rp/indexce.htm>). Thus,  
53  
54 162 we adjusted the prevalence of HUA by these proportions. All analyses were two-sided.  
55  
56 163  $P < 0.05$  was considered significant.



## 164 **Results**

### 165 **Characteristics of this eastern Chinese population**

166 In our study, we analyzed UA in 9,225 Chinese adults, including 3,682 males (age,  
167 55.57±13.23 y) and 5,543 females (age 54.30±12.82 y). The mean levels of serum UA were  
168 352.12±79.30 nmol/L and 269.29±64.68 nmol/L in males and females, respectively. There  
169 were significant sex differences in blood glucose, blood lipids, UA, BMI, WC and blood  
170 pressure. The prevalence of diabetes and hypertension also showed a significant difference  
171 (Table 1).

### 173 **Metabolic risk factors of this eastern Chinese population**

174 The prevalence of diabetes and hypertension, WC, SBP and BMI increased with age. As BMI  
175 and glucose levels rose, the prevalence of hypertension, WC, SBP, BMI, triglyceride (TG),  
176 FPG, and HbA1c increased. Moreover, people living in rural areas had a higher prevalence of  
177 diabetes, WC, SBP, low-density lipoprotein (LDL), high-density lipoprotein (HDL), total  
178 cholesterol (TC) and HbA1c. People with a high economic status had a higher prevalence of  
179 diabetes, WC, UA, BMI, LDL, FPG, HbA1c and Cr (Tables 2, 3).

### 181 **Estimated prevalence of HUA in this eastern Chinese population**

182 The prevalence of HUA was 12.3% (11.6, 12.9), with 17.9% (16.7, 19.1) and 8.5% (7.8, 9.3)  
183 in males and females, respectively. The prevalence of HUA in urban areas was higher than  
184 that in rural areas (12.9% vs. 10.8%). The prevalence of HUA in developed areas was slightly  
185 higher than that in underdeveloped areas (12.6% vs. 11.8%). As BMI increased, the  
186 prevalence of HUA increased in both men and women. In women, the prevalence of HUA  
187 increased in normal, prediabetic and diabetic populations. However, this trend was not  
188 obvious in men. After adjusting for the proportions of the population in different age groups,  
189 the prevalence of HUA was 11.3% (9.9, 12.7), with 20.7% (17.7, 23.7) and 5.6% (4.3, 6.7) in  
190 males and females, respectively (Table 4). When HUA was defined as serum UA of more  
191 than 420 µmol/L in both men and women, the prevalence of HUA was 8.4% (7.8, 9.0), with  
192 17.9% (16.7, 19.1) and 2.1% (1.7, 2.5) in males and females, respectively. After adjusting for  
193 the proportions of the population in different age groups, the prevalence of HUA was 8.8%

1  
2  
3  
4 194 (7.5, 10.1), with 20.7% (17.7, 23.7) and 1.4% (0.7, 2.0) in males and females, respectively  
5  
6 195 (Supplemental Table 1).

7  
8 196

9  
10 197 **Logistic regression analysis of HUA**

11 198 Male sex, urban residency, increased TC or TG, overweight, obesity, elevated SBP and low  
12  
13 199 economic status were all risk factors for HUA in this eastern Chinese population (Table 5).

14  
15 200 However, increased age, higher educational status, increased LDL or HDL, current smoking  
16  
17 201 or drinking and elevated DBP were not associated with the risk of HUA. When HUA was  
18  
19 202 defined as serum UA of more than 420  $\mu\text{mol/L}$  in both men and women, the association was  
20  
21 203 similar to the above results (Supplemental Table 2).

## 204 Discussion

205 In this eastern Chinese population, the prevalence of HUA was 11.3%, which was similar to  
206 the pooled prevalence reported in a systematic review performed in China (13.3%) [15].  
207 However, this prevalence was more than that in the national HUA survey, which reported that  
208 the prevalence of HUA was 8.4% [13]. The previous survey was performed in 2009-2010.  
209 Our study occurred in 2014-2015. These two studies investigated different populations. In  
210 addition, our prevalence was relatively lower than that in Qingdao, which is close to the sea  
211 and where residents consume high amounts of seafood and beer [22]. Moreover, the  
212 prevalence of HUA in our population was lower than those in the United States and Japan [12,  
213 23], which might be attributed to economic status.

214 The prevalence of HUA in young men (<40 years) was seven times greater than that in  
215 young women. However, as age increased, the prevalence of HUA gradually decreased in  
216 men and increased in women, which was coincident with values previously reported [24]. In  
217 residents more than 60 years of age, men and women had a similar prevalence of HUA. We  
218 deduced that the diet of young men contains more purine than that of old men. The young  
219 men also had an active metabolism. The prevalence of HUA was dramatically increased in  
220 women older than 60 years, which might be caused by reduced estrogen levels.

221 Risk factors for HUA were also evaluated in our study. We found that male sex, urban  
222 residency, hypertriglyceridemia, hypercholesterolemia, overweight, obesity, high SBP and  
223 low economic status were risk factors for HUA. In previous studies, hypertriglyceridemia was  
224 thought to be the strongest risk factor for HUA [24, 25]. However, the OR for HUA was 1.7  
225 times with 1 SD elevation of triglyceridemia. In addition, obesity was the strongest risk factor  
226 (OR=2.874) in our study. China has the largest obese population in the world [26]. In this  
227 case, the prevalence of HUA will increase with the rising trend of obesity. Therefore, we  
228 should pay more attention to prevent its consequences.

229 HUA is closely related to lifestyle and dietary habits. In previous studies, the prevalence of  
230 HUA in urban areas was much greater than that in rural areas [13, 24]. In our study, the  
231 prevalence of HUA in urban areas was mildly elevated (12.9% vs. 10.8%), and urbanization  
232 was a risk factor for HUA. Eastern China is considered the developed area in the whole  
233 country. Therefore, the difference between urban and rural areas was not obvious as in other

1  
2  
3  
4 234 places. Moreover, people with high economic status consumed more healthy food that  
5  
6 235 contained low purine ingredients. This could partly explain why low economic status became  
7  
8 236 a risk factor for HUA. In accordance with a previous study, smoking was not associated with  
9  
10 237 HUA [13]. However, according to a previous study, alcohol intake influences serum UA,  
11  
12 238 which is different from the results of our study. This difference might have been caused by  
13  
14 239 our definition of current drinking (current drinking was defined as drinking in the past 1  
15  
16 240 month), which mixed nonhabitual drinkers and habitual drinkers together.

17  
18 241 As age increased, UA together with components of metabolic syndrome (FPG, SBP, WC)  
19  
20 242 also increased, which indicated that there might be a close relationship between metabolic  
21  
22 243 syndrome and HUA. Other studies have also found that HUA is associated with metabolic  
23  
24 244 syndrome [27, 28]. An epidemiologic study showed that HUA is positively correlated with  
25  
26 245 fasting serum insulin [29]. Krishnan et al reported that people with HUA have 1.36 times the  
27  
28 246 risk of developing insulin resistance in a 15-year follow-up study [30]. Thus, research has  
29  
30 247 indicated that insulin resistance plays an important role in the relationship between metabolic  
31  
32 248 syndrome and HUA [31].

33  
34 249 There were several limitations in our study. First, this was not a national study but a local  
35  
36 250 survey. Second, we did not consider the influence of diet. Blood was drawn after fasting for  
37  
38 251 eight hours. However, the diet ingested near the blood drawing time was unknown. In  
39  
40 252 addition, this was a cross-sectional study. Therefore, we could not identify a causal  
41  
42 253 relationship between HUA and its risk factors.

43  
44 254 In this study, we estimated the prevalence of HUA in an eastern Chinese population. To  
45  
46 255 prevent the prevalence of HUA, more attention should be paid to life status (such as economic  
47  
48 256 status and residence) and metabolic indexes (TC, TG, BMI, and SBP).  
49  
50  
51  
52  
53  
54  
55  
56  
57  
58  
59  
60

257 **References**

- 258 1. Strazzullo P, Puig JG. Uric acid and oxidative stress: relative impact on cardiovascular  
259 risk? *Nutr Metab Cardiovasc Dis*. 2007;17:409-14.
- 260 2. Strazzullo P, Barba G, Cappuccio FP, et al. Altered renal sodium handling in men with  
261 abdominal adiposity: a link to hypertension. *J Hypertens*. 2001;19:2157-64.
- 262 3. Strazzullo P, Barbato A, Galletti F, et al. Abnormalities of renal sodium handling in the  
263 metabolic syndrome. Results of the Olivetti Heart Study. *J Hypertens*. 2006;24:1633-9.
- 264 4. Kanellis J, Kang DH. Uric acid as a mediator of endothelial dysfunction, inflammation,  
265 and vascular disease. *Semin Nephrol*. 2005;25:39-42.
- 266 5. Xu C, Yu C, Xu L, et al. High serum uric acid increases the risk for nonalcoholic Fatty  
267 liver disease: a prospective observational study. *PLoS One*. 2010;5:e11578.
- 268 6. Ryu S, Chang Y, Kim SG, et al. Serum uric acid levels predict incident nonalcoholic  
269 fatty liver disease in healthy Korean men. *Metabolism*. 2011;60:860-866.
- 270 7. Gustafsson D, Unwin R. The pathophysiology of hyperuricaemia and its possible  
271 relationship to cardiovascular disease, morbidity and mortality. *BMC Nephrol*.  
272 2013;14:164.
- 273 8. Katsiki N, Karagiannis A, Athyros VG, et al. Hyperuricaemia: more than just a cause of  
274 gout? *J Cardiovasc Med (Hagerstown)*. 2013;14:397-402.
- 275 9. Choi HK, Curhan G. Independent impact of gout on mortality and risk for coronary heart  
276 disease. *Circulation*. 2007;116:894-900.
- 277 10. Choi HK, Ford ES. Prevalence of the metabolic syndrome in individuals with  
278 hyperuricemia. *Am J Med*. 2007;120:442-7.
- 279 11. Kim SY, Guevara JP, Kim KM, et al. Hyperuricemia and coronary heart disease: a  
280 systematic review and meta-analysis. *Arthritis Care Res (Hoboken)*. 2010;62:170-80.
- 281 12. Zhu Y, Pandya BJ, Choi HK. Prevalence of gout and hyperuricemia in the US general  
282 population: the National Health and Nutrition Examination Survey 2007-2008. *Arthritis*  
283 *Rheum*. 2011;63:3136-41.
- 284 13. Liu H, Zhang XM, Wang YL, et al. Prevalence of hyperuricemia among Chinese adults:  
285 a national cross-sectional survey using multistage, stratified sampling. *J Nephrol*.  
286 2014;27:653-8.

- 1  
2  
3  
4 287 14. Wang R, Tang Z, Sun F, Diao LJ. Prevalence of hyperuricemia in the elderly in 7 areas  
5  
6 288 of China. *Zhonghua Liu Xing Bing Xue Za Zhi*. 2018;39:286-8.
- 7  
8 289 15. Liu R, Han C, Wu D, et al. Prevalence of Hyperuricemia and Gout in Mainland China  
9  
10 290 from 2000 to 2014: A Systematic Review and Meta-Analysis. *Biomed Res Int*.  
11  
12 291 2015;2015:762820.
- 13  
14 292 16. China National Bureau of Statistics, 2016. Statistical Communiqué of China on  
15  
16 293 2015 National Economic and Social Development. Retrieved from:  
17  
18 294 [http://www.stats.gov.cn/tjsj/zxfb/201602/t20160229\\_1323991.html](http://www.stats.gov.cn/tjsj/zxfb/201602/t20160229_1323991.html) .
- 19  
20 295 17. Wang N, Shao H, Chen Y, et al. Follicle-Stimulating Hormone, Its Association with  
21  
22 296 Cardiometabolic Risk Factors, and 10-Year Risk of Cardiovascular Disease in  
23  
24 297 Postmenopausal Women. *J Am Heart Assoc*. 2017;6. pii: e005918.
- 25  
26 298 18. Cai Z, Xu X, Wu X, et al. Hyperuricemia and the metabolic syndrome in Hangzhou. *Asia*  
27  
28 299 *Pac J Clin Nutr*. 2009;18:81-7.
- 29  
30 300 19. American Diabetes Association. Diagnosis and classification of diabetes mellitus.  
31  
32 301 *Diabetes Care*. 2010; 33: S62–S69.
- 33  
34 302 20. Xu Y, Wang L, He J, et al. Prevalence and control of diabetes in Chinese adults. *JAMA*.  
35  
36 303 2013;310:948-59.
- 37  
38 304 21. Han B, Wang X, Wang N, et al. Investigation of vitamin D status and its correlation with  
39  
40 305 insulin resistance in a Chinese population. *Public Health Nutr*. 2017;20:1602-8.
- 41  
42 306 22. Dong Y, Nan H, Gao W. Prevalence of the metabolic syndrome among adults aged  
43  
44 307 20–74 years in Zhanshan community of Qingdao. *Chinese Journal of Diabetes*.  
45  
46 308 2004;12:177-81.
- 47  
48 309 23. Nagahama K, Iseki K, Inoue T, et al. Hyperuricemia and cardiovascular risk factor  
49  
50 310 clustering in a screened cohort in Okinawa, Japan. *Hypertens Res*. 2004;27(4):227-33.
- 51  
52 311 24. Yang J, Liu Z, Zhang C, et al. The prevalence of hyperuricemia and its correlates in an  
53  
54 312 inland Chinese adult population, urban and rural of Jinan. *Rheumatol Int*.  
55  
56 313 2013;33:1511-7.
- 57  
58 314 25. Miao Z, Li C, Chen Y, et al. Dietary and lifestyle changes associated with high  
59  
60 315 prevalence of hyperuricemia and gout in the Shandong coastal cities of Eastern China. *J*  
316 *Rheumatol*. 2008;35:1859-64.

1  
2  
3  
4  
5  
6  
7  
8  
9  
10  
11  
12  
13  
14  
15  
16  
17  
18  
19  
20  
21  
22  
23  
24  
25  
26  
27  
28  
29  
30  
31  
32  
33  
34  
35  
36  
37  
38  
39  
40  
41  
42  
43  
44  
45  
46  
47  
48  
49  
50  
51  
52  
53  
54  
55  
56  
57  
58  
59  
60

- 317 26. NCD Risk Factor Collaboration (NCD-RisC). Trends in adult body-mass index in 200  
318 countries from 1975 to 2014: a pooled analysis of 1698 population-based measurement  
319 studies with 19·2 million participants. *Lancet*. 2016;387:1377-96.
- 320 27. Lim JH, Kim YK, Kim YS, et al. Relationship between serum uric Acid levels,  
321 metabolic syndrome, and arterial stiffness in korean. *Korean Circ J*. 2010;40:314-20.
- 322 28. Lin SD, Tsai DH, Hsu SR. Association between serum uric acid level and components of  
323 the metabolic syndrome. *J Chin Med Assoc*. 2006;69:512-6.
- 324 29. Yoo TW, Sung KC, Shin HS, et al. Relationship between serum uric acid concentration  
325 and insulin resistance and metabolic syndrome. *Circ J*. 2005;69:928-33.
- 326 30. Krishnan E, Pandya BJ, Chung L, et al. Hyperuricemia in young adults and risk of  
327 insulin resistance, prediabetes, and diabetes: a 15-year follow-up study. *Am J Epidemiol*.  
328 2012;176:108-16.
- 329 31. Li C, Hsieh MC, Chang SJ. Metabolic syndrome, diabetes, and hyperuricemia. *Curr Opin*  
330 *Rheumatol*. 2013;25:210-6.

1  
2  
3  
4 331 **Figure legend**

5 332 **Supplemental Figure 1** Position of the 5 provinces and 22 sites in China.

6  
7 333 Residents from 22 sites in Shanghai, Zhejiang, Jiangsu, Anhui and Jiangxi provinces were

8  
9 334 enrolled in SPECT-China study.  
10  
11  
12  
13  
14  
15  
16  
17  
18  
19  
20  
21  
22  
23  
24  
25  
26  
27  
28  
29  
30  
31  
32  
33  
34  
35  
36  
37  
38  
39  
40  
41  
42  
43  
44  
45  
46  
47  
48  
49  
50  
51  
52  
53  
54  
55  
56  
57  
58  
59  
60



1  
2  
3  
4  
5  
6  
7  
8  
9  
10  
11  
12  
13  
14  
15  
16  
17  
18  
19  
20  
21  
22  
23  
24  
25  
26  
27  
28  
29  
30  
31  
32  
33  
34  
35  
36  
37  
38  
39  
40  
41  
42  
43  
44  
45  
46  
47  
48  
49  
50  
51  
52  
53  
54  
55  
56  
57  
58  
59  
60

335 **Table 1** Baseline characteristics between different groups.

| Variables             | Men (n=3682) | Women (n=5543) | P value |
|-----------------------|--------------|----------------|---------|
| Age y                 | 55.57±13.23  | 54.30±12.82    | <0.001  |
| FPG mmol/L            | 5.72±1.63    | 5.50±1.36      | <0.001  |
| HbA1c %               | 5.78±1.08    | 5.64±0.92      | <0.001  |
| TG mmol/L             | 1.88±1.79    | 1.55±1.20      | <0.001  |
| TC mmol/L             | 5.14±1.13    | 5.27±1.15      | <0.001  |
| LDL mmol/L            | 3.23±0.77    | 3.30±0.83      | <0.001  |
| HDL mmol/L            | 1.30±0.31    | 1.45±0.32      | <0.001  |
| UA umol/L             | 352.1±79.3   | 269.3±64.7     | <0.001  |
| BMI kg/m <sup>2</sup> | 25.11±3.45   | 24.40±3.67     | <0.001  |
| WC cm                 | 85.85±9.42   | 78.72±9.90     | <0.001  |
| SBP mmHg              | 134.3±20.7   | 131.1±22.2     | <0.001  |
| DBP mmHg              | 82.1±12.9    | 77.8±12.9      | <0.001  |
| Diabetes %            | 16.3%        | 12.7%          | <0.001  |
| Hypertension %        | 53.4%        | 44.1%          | <0.001  |

336 Uric acid: UA; Fasting plasma glucose: FPG; Alanine aminotransferase: ALT; Triglycerides: TG;

337 Total cholesterol: TC; Body mass index: BMI; Waist circumference: WC; Systolic blood pressure:

338 SBP; Diastolic blood pressure: DBP

**Table 2** Characteristics of Eastern Chinese population.

|                 | Percentage % (95%CI) |                   |                   |                   | Means $\pm$ SD    |                  |                  |
|-----------------|----------------------|-------------------|-------------------|-------------------|-------------------|------------------|------------------|
|                 | Diabetes             | Hypertension      | Smoking           | Drinking          | WC                | SBP              | BMI              |
| Overall         | 14.1 (13.4, 14.8)    | 47.8 (46.8, 48.9) | 19.2 (18.3, 20.0) | 55.8 (54.8, 56.9) | 81.57 $\pm$ 10.32 | 132.4 $\pm$ 21.7 | 24.68 $\pm$ 3.60 |
| Location        |                      |                   |                   |                   |                   |                  |                  |
| Rural           | 15.8 (14.4, 17.2)    | 58.7 (56.8, 60.6) | 22.9 (21.3, 24.5) | 56.6 (54.7, 58.5) | 83.14 $\pm$ 10.38 | 139.7 $\pm$ 23.2 | 24.71 $\pm$ 3.65 |
| Urban           | 13.4 (12.6, 14.2)    | 43.3 (42.1, 44.5) | 17.6 (16.7, 18.6) | 55.5 (54.3, 56.7) | 80.90 $\pm$ 10.23 | 129.4 $\pm$ 20.3 | 24.67 $\pm$ 3.58 |
| Age groups      |                      |                   |                   |                   |                   |                  |                  |
| <40             | 1.6 (0.9, 2.3)       | 11.1 (9.4, 12.9)  | 12.9 (11.0, 14.8) | 42.0 (39.2, 44.7) | 75.22 $\pm$ 10.55 | 116.8 $\pm$ 15.0 | 23.38 $\pm$ 3.61 |
| 40-60           | 11.3 (10.3, 12.2)    | 41.8 (40.3, 43.3) | 20.8 (19.6, 22.0) | 54.9 (53.4, 56.5) | 80.78 $\pm$ 9.87  | 129.5 $\pm$ 20.1 | 24.82 $\pm$ 3.35 |
| $\geq$ 60       | 21.5 (20.2, 22.9)    | 67.1 (65.6, 68.7) | 19.4 (18.1, 20.7) | 61.5 (59.9, 63.1) | 84.60 $\pm$ 9.59  | 141.0 $\pm$ 21.5 | 24.96 $\pm$ 3.79 |
| Economic status |                      |                   |                   |                   |                   |                  |                  |
| low             | 12.3 (11.3, 13.3)    | 47.8 (46.3, 49.4) | 21.2 (19.9, 22.5) | 46.6 (45.1, 48.2) | 81.07 $\pm$ 10.57 | 134.2 $\pm$ 23.5 | 24.50 $\pm$ 3.55 |
| high            | 15.6 (14.6, 16.6)    | 47.8 (46.4, 49.2) | 17.6 (16.5, 18.6) | 62.9 (61.6, 64.3) | 81.96 $\pm$ 10.10 | 131.0 $\pm$ 20.1 | 24.83 $\pm$ 3.64 |
| BMI             |                      |                   |                   |                   |                   |                  |                  |
| <24             | 9.8 (8.9, 10.7)      | 35.2 (33.7, 36.7) | 16.6 (15.4, 17.7) | 52.9 (51.3, 54.5) | 74.72 $\pm$ 7.85  | 126.9 $\pm$ 21.1 | 21.67 $\pm$ 1.69 |
| 24-28           | 15.2 (14.0, 16.4)    | 53.0 (51.4, 54.7) | 20.6 (19.2, 21.9) | 58.3 (56.7, 59.9) | 84.57 $\pm$ 7.30  | 135.2 $\pm$ 21.2 | 25.79 $\pm$ 1.12 |
| $\geq$ 28       | 24.1 (21.8, 26.3)    | 69.1 (66.7, 71.5) | 22.8 (20.6, 25.0) | 57.6 (55.0, 60.2) | 93.34 $\pm$ 8.52  | 140.5 $\pm$ 20.2 | 30.40 $\pm$ 3.09 |
| Glucose status  |                      |                   |                   |                   |                   |                  |                  |
| normal          | -                    | 37.0 (35.6, 38.3) | 16.2 (15.1, 17.2) | 50.6 (49.3, 52.0) | 78.95 $\pm$ 9.88  | 128.0 $\pm$ 20.6 | 24.08 $\pm$ 3.44 |
| prediabetes     | -                    | 57.6 (55.7, 59.5) | 23.4 (21.7, 25.0) | 63.2 (61.3, 65.1) | 83.90 $\pm$ 9.53  | 136.7 $\pm$ 21.6 | 25.26 $\pm$ 3.55 |
| diabetes        | -                    | 72.7 (70.3, 75.2) | 23.0 (20.6, 25.3) | 61.3 (58.7, 64.0) | 87.60 $\pm$ 9.97  | 141.9 $\pm$ 21.2 | 26.00 $\pm$ 3.78 |

1  
2  
3  
4  
5  
6  
7  
8  
9  
10  
11  
12  
13  
14  
15  
16  
17  
18  
19  
20  
21  
22  
23  
24  
25  
26  
27  
28  
29  
30  
31  
32  
33  
34  
35  
36  
37  
38  
39  
40  
41  
42  
43  
44  
45  
46

Body mass index: BMI; Waist circumference: WC; Systolic blood pressure: SBP

**Table 3** Biochemical index of Eastern Chinese population.

|                 | Means $\pm$ SD    |                  |                 |                  |                 |                  |                  |                    |
|-----------------|-------------------|------------------|-----------------|------------------|-----------------|------------------|------------------|--------------------|
|                 | UA                | LDL              | TG              | HDL              | TC              | FPG              | HbA1c            | Creatinine         |
| Overall         | 302.0 $\pm$ 81.5  | 3.28 $\pm$ 0.81  | 1.68 $\pm$ 1.48 | 1.39 $\pm$ 0.32  | 5.22 $\pm$ 1.14 | 5.58 $\pm$ 1.48  | 5.70 $\pm$ 0.99  | 77.31 $\pm$ 14.96  |
| Location        |                   |                  |                 |                  |                 |                  |                  |                    |
| Rural           | 294.8 $\pm$ 83.0  | 3.38 $\pm$ 0.83  | 1.69 $\pm$ 1.56 | 1.44 $\pm$ 0.31  | 5.37 $\pm$ 1.07 | 5.63 $\pm$ 1.60  | 5.80 $\pm$ 1.03  | 73.76 $\pm$ 14.20  |
| Urban           | 305.6 $\pm$ 80.9  | 3.23 $\pm$ 0.80  | 1.67 $\pm$ 1.43 | 1.37 $\pm$ 0.33  | 5.16 $\pm$ 1.17 | 5.57 $\pm$ 1.42  | 5.65 $\pm$ 0.96  | 78.87 $\pm$ 15.13  |
| Age groups      |                   |                  |                 |                  |                 |                  |                  |                    |
| <40             | 294.1 $\pm$ 85.7  | 2.81 $\pm$ 0.65  | 1.35 $\pm$ 1.25 | 1.39 $\pm$ 0.30  | 4.60 $\pm$ 0.87 | 4.98 $\pm$ 0.76  | 5.09 $\pm$ 0.57  | 75.82 $\pm$ 14.73  |
| 40-60           | 298.0 $\pm$ 82.8  | 3.29 $\pm$ 0.78  | 1.76 $\pm$ 1.71 | 1.39 $\pm$ 0.32  | 5.24 $\pm$ 1.16 | 5.52 $\pm$ 1.46  | 5.62 $\pm$ 0.94  | 76.26 $\pm$ 14.59  |
| $\geq$ 60       | 310.1 $\pm$ 78.3  | 3.42 $\pm$ 0.83  | 1.69 $\pm$ 1.20 | 1.38 $\pm$ 0.34  | 5.39 $\pm$ 1.13 | 5.86 $\pm$ 1.60  | 5.98 $\pm$ 1.04  | 79.09 $\pm$ 15.47  |
| Economic status |                   |                  |                 |                  |                 |                  |                  |                    |
| low             | 299.8 $\pm$ 85.1  | 3.23 $\pm$ 0.82  | 1.70 $\pm$ 1.65 | 1.45 $\pm$ 0.32  | 5.20 $\pm$ 1.05 | 5.54 $\pm$ 1.48  | 5.62 $\pm$ 0.99  | 76.29 $\pm$ 15.23  |
| high            | 304.4 $\pm$ 78.7* | 3.31 $\pm$ 0.80* | 1.66 $\pm$ 1.31 | 1.34 $\pm$ 0.32* | 5.23 $\pm$ 1.21 | 5.62 $\pm$ 1.47* | 5.75 $\pm$ 0.98* | 78.20 $\pm$ 14.83* |
| BMI             |                   |                  |                 |                  |                 |                  |                  |                    |
| <24             | 279.5 $\pm$ 73.3  | 3.15 $\pm$ 0.80  | 1.35 $\pm$ 1.05 | 1.48 $\pm$ 0.33  | 5.11 $\pm$ 1.09 | 5.39 $\pm$ 1.35  | 5.53 $\pm$ 0.92  | 75.83 $\pm$ 14.26  |
| 24-28           | 313.9 $\pm$ 81.7  | 3.36 $\pm$ 0.81  | 1.85 $\pm$ 1.50 | 1.33 $\pm$ 0.30  | 5.28 $\pm$ 1.18 | 5.64 $\pm$ 1.47  | 5.76 $\pm$ 0.99  | 78.34 $\pm$ 15.37  |
| $\geq$ 28       | 335.5 $\pm$ 85.3  | 3.44 $\pm$ 0.80  | 2.20 $\pm$ 2.13 | 1.27 $\pm$ 0.28  | 5.39 $\pm$ 1.17 | 6.00 $\pm$ 1.74  | 6.02 $\pm$ 1.10  | 78.95 $\pm$ 15.44  |
| Glucose status  |                   |                  |                 |                  |                 |                  |                  |                    |
| normal          | 294.9 $\pm$ 81.3  | 3.12 $\pm$ 0.76  | 1.54 $\pm$ 1.38 | 1.41 $\pm$ 0.32  | 5.05 $\pm$ 1.10 | 5.09 $\pm$ 0.54  | 5.16 $\pm$ 0.36  | 76.81 $\pm$ 14.77  |
| prediabetes     | 313.1 $\pm$ 81.1  | 3.51 $\pm$ 0.81  | 1.71 $\pm$ 1.17 | 1.38 $\pm$ 0.32  | 5.49 $\pm$ 1.12 | 5.45 $\pm$ 0.72  | 5.93 $\pm$ 0.20  | 77.95 $\pm$ 14.83  |
| diabetes        | 310.9 $\pm$ 81.2  | 3.42 $\pm$ 0.86  | 2.18 $\pm$ 2.14 | 1.29 $\pm$ 0.32  | 5.38 $\pm$ 1.21 | 7.89 $\pm$ 2.63  | 7.38 $\pm$ 1.49  | 78.22 $\pm$ 16.38  |

1  
2  
3 Uric acid: UA; Triglycerides: TG; Total cholesterol: TC; Low-density lipoprotein: LDL;  
4 High-density lipoprotein: HDL; Glycated hemoglobin: HbA1c; Fasting plasma glucose: FPG  
5  
6  
7  
8  
9  
10  
11  
12  
13  
14  
15  
16  
17  
18  
19  
20  
21  
22  
23  
24  
25  
26  
27  
28  
29  
30  
31  
32  
33  
34  
35  
36  
37  
38  
39  
40  
41  
42  
43  
44  
45  
46  
47  
48  
49  
50  
51  
52  
53  
54  
55  
56  
57  
58  
59  
60

**Table 4** Estimated prevalence of HUA in Eastern Chinese population.

|                 | Percentage % (95%CI) |                   |                   |
|-----------------|----------------------|-------------------|-------------------|
|                 | Overall              | Men               | Women             |
| Overall         | 12.3 (11.6, 12.9)    | 17.9 (16.7-19.1)  | 8.5 (7.8-9.3)     |
| Overall*        | 11.3 (9.9, 12.7)     | 20.7 (17.7, 23.7) | 5.6 (4.3, 6.7)    |
| Location        |                      |                   |                   |
| Urban           | 12.9 (12.1, 13.7)    | 19.1 (17.6-20.7)  | 8.9 (8.0-9.8)     |
| Rural           | 10.8 (9.6, 12.0)     | 15.2 (13.1-17.3)  | 7.7 (6.4-9.0)     |
| Age groups      |                      |                   |                   |
| <40             | 10.8 (9.0, 12.5)     | 22.8 (19.0, 26.6) | 3.3 (2.0, 4.5)    |
| 40-60           | 11.2 (10.3, 12.2)    | 18.9 (17.0, 20.8) | 6.5 (5.5, 7.4)    |
| >=60            | 13.9 (12.8, 15.0)    | 15.4 (13.6, 17.2) | 12.8 (11.4, 14.2) |
| Economic status |                      |                   |                   |
| low             | 11.8 (10.9-12.8)     | 18.3 (16.5-20.1)  | 7.2 (6.1-8.2)     |
| high            | 12.6 (11.7-13.5)     | 17.5 (15.8-19.2)  | 9.5 (8.5-10.6)    |
| BMI             |                      |                   |                   |
| <24             | 6.7 (5.9, 7.5)       | 10.5 (8.9, 12.2)  | 4.8 (3.9, 5.6)    |
| 24-28           | 14.1 (13.0, 15.3)    | 19.9 (18.0, 21.9) | 9.4 (8.1, 10.7)   |
| >=28            | 22.5 (20.3, 24.6)    | 27.3 (23.9, 30.8) | 18.5 (15.7, 21.2) |
| Glucose status  |                      |                   |                   |
| normal          | 10.1 (9.3-10.9)      | 17.5 (15.8-19.2)  | 5.7 (4.9-6.5)     |
| prediabetes     | 15.2 (13.9-16.6)     | 20.3 (17.9-22.7)  | 11.6 (10.0-13.2)  |
| diabetes        | 15.1 (13.1-17.0)     | 15.0 (12.1-17.8)  | 15.2 (12.5-17.9)  |

Body mass index: BMI

\* standardized by proportions of population of 6th national population census data

**Table 5** Risk factors for HUA in Eastern Chinese population.

| Risk factors                    | OR    | (95%CI)      |
|---------------------------------|-------|--------------|
| Female sex                      | 0.510 | 0.427, 0.609 |
| Age per 10 years                | 1.041 | 0.976, 1.112 |
| Urban residency                 | 2.218 | 1.681, 2.927 |
| ≥Junior middle school education | 1.042 | 0.866, 1.253 |
| Lipids                          |       |              |
| LDL per 1SD                     | 1.018 | 0.888, 1.168 |
| HDL per 1SD                     | 0.936 | 0.850, 1.032 |
| TC per 1SD                      | 1.226 | 1.050, 1.432 |
| TG per 1SD                      | 1.672 | 1.491, 1.875 |
| Current smoking                 | 0.942 | 0.778, 1.141 |
| Current drinking                | 0.913 | 0.784, 1.062 |
| BMI                             |       |              |
| Overweight                      | 1.772 | 1.481, 2.120 |
| Obesity                         | 2.874 | 2.338, 3.532 |
| Blood pressure                  |       |              |
| SBP per 10mmHg                  | 1.055 | 1.009, 1.103 |
| DBP per 10mmHg                  | 1.012 | 0.944, 1.085 |
| High economic status            | 0.688 | 0.538, 0.879 |

Data are expressed as unStandardized B (95%CI). The enter procedure was used.

Body mass index: BMI

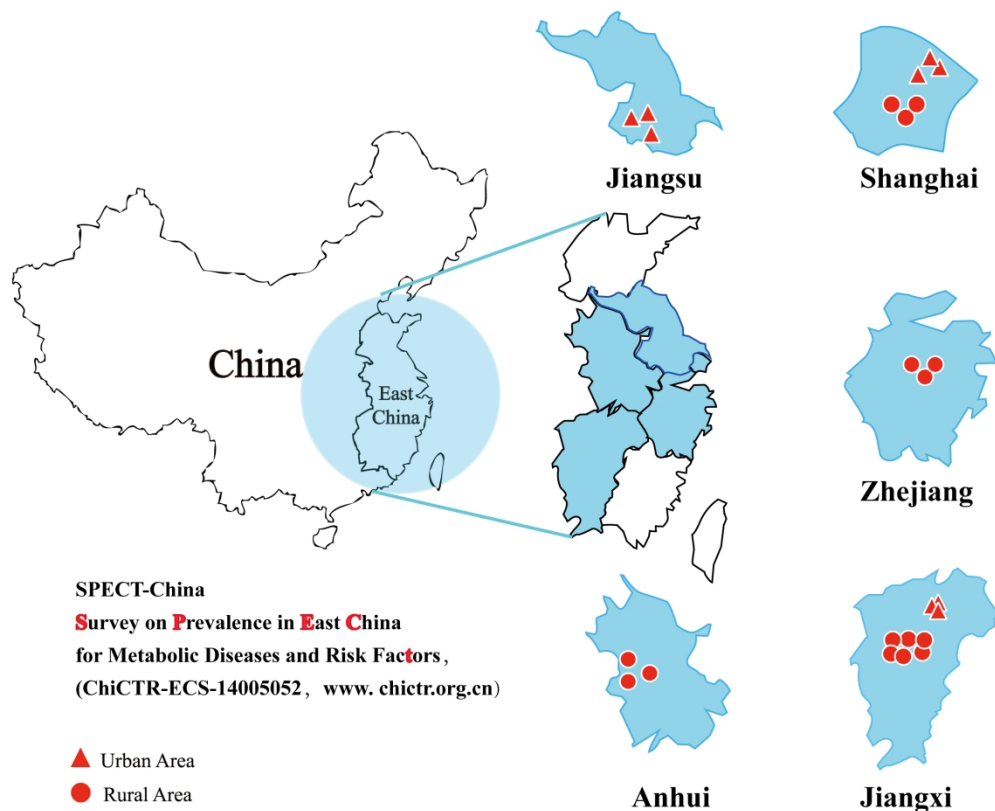

214x174mm (300 x 300 DPI)



**Supplemental Table 1** Estimated prevalence of HUA (UA>420 $\mu$ mol/L) in Eastern Chinese population.

|                 | Percentage % (95%CI) |                   |                |
|-----------------|----------------------|-------------------|----------------|
|                 | Overall              | Men               | Women          |
| Overall         | 8.4 (7.8, 9.0)       | 17.9 (16.7, 19.1) | 2.1 (1.7, 2.5) |
| Overall*        | 8.8 (7.5, 10.1)      | 20.7 (17.7, 23.7) | 1.4 (0.7, 2.0) |
| Location        |                      |                   |                |
| Urban           | 8.8 (8.1, 9.5)       | 19.1 (17.6-20.7)  | 2.1 (1.7, 2.6) |
| Rural           | 7.5 (6.5, 8.5)       | 15.2 (13.1-17.3)  | 1.9 (1.3, 2.6) |
| Age groups      |                      |                   |                |
| <40             | 9.3 (7.7, 10.9)      | 22.8 (19.0, 26.6) | 0.9 (0.2, 1.6) |
| 40-60           | 8.0 (7.2, 8.8)       | 18.9 (17.0, 20.8) | 1.3 (0.8, 1.7) |
| >=60            | 8.5 (7.6, 9.4)       | 15.4 (13.6, 17.2) | 3.5 (2.7, 4.2) |
| Economic status |                      |                   |                |
| low             | 8.6 (7.7, 9.5)       | 18.3 (16.5-20.1)  | 1.6 (1.1, 2.0) |
| high            | 8.2 (7.5, 9.0)       | 17.5 (15.8-19.2)  | 2.5 (1.9, 3.0) |
| BMI             |                      |                   |                |
| <24             | 4.2 (3.6, 4.8)       | 10.5 (8.9, 12.2)  | 0.9 (0.6, 1.3) |
| 24-28           | 10.1 (9.1, 11.1)     | 19.9 (18.0, 21.9) | 2.1 (1.4, 2.7) |
| >=28            | 15.7 (13.8, 17.6)    | 27.3 (23.9, 30.8) | 6.0 (4.4, 7.7) |
| Glucose status  |                      |                   |                |
| normal          | 7.3 (6.6, 8.0)       | 17.5 (15.8, 19.2) | 1.1 (0.8, 1.5) |
| prediabetes     | 10.3 (9.1, 11.4)     | 20.3 (17.9, 22.7) | 3.1 (2.2, 3.9) |
| diabetes        | 9.4 (7.8, 10.9)      | 15.0 (12.1, 17.8) | 4.6 (3.0, 6.1) |

Body mass index: BMI

\* standardized by proportions of population of 6th national population census data

**Supplemental table 2** Risk factors for HUA (UA>420 $\mu$ mol/L) in Eastern Chinese population.

| Risk factors                          | OR    | (95%CI)      |
|---------------------------------------|-------|--------------|
| Female sex                            | 0.110 | 0.086, 0.142 |
| Age per 10 years                      | 0.937 | 0.867, 1.013 |
| Urban residency                       | 2.292 | 1.654, 3.176 |
| $\geq$ Junior middle school education | 1.037 | 0.835, 1.288 |
| Lipids                                |       |              |
| LDL per 1SD                           | 1.014 | 0.861, 1.193 |
| HDL per 1SD                           | 0.984 | 0.873, 1.109 |
| TC per 1SD                            | 1.209 | 1.004, 1.456 |
| TG per 1SD                            | 1.724 | 1.504, 1.978 |
| Current smoking                       | 0.921 | 0.755, 1.123 |
| Current drinking                      | 1.008 | 0.841, 1.209 |
| BMI                                   |       |              |
| Overweight                            | 1.812 | 1.448, 2.268 |
| Obesity                               | 2.835 | 2.191, 3.668 |
| Blood pressure                        |       |              |
| SBP per 10mmHg                        | 1.082 | 1.023, 1.145 |
| DBP per 10mmHg                        | 1.017 | 0.932, 1.109 |
| High economic status                  | 0.670 | 0.504, 0.890 |

Data are expressed as unStandardized B (95%CI). The enter procedure was used.

Body mass index: BMI

**STROBE Statement**

## Checklist of items that should be included in reports of observational studies

| Section/Topic             | Item No | Recommendation                                                                                                                                                                             | Reported on Page No |
|---------------------------|---------|--------------------------------------------------------------------------------------------------------------------------------------------------------------------------------------------|---------------------|
| <b>Title and abstract</b> | 1       | (a) Indicate the study's design with a commonly used term in the title or the abstract                                                                                                     | 1,4                 |
|                           |         | (b) Provide in the abstract an informative and balanced summary of what was done and what was found                                                                                        | 1,4                 |
| <b>Introduction</b>       |         |                                                                                                                                                                                            |                     |
| Background/rationale      | 2       | Explain the scientific background and rationale for the investigation being reported                                                                                                       | 7                   |
| Objectives                | 3       | State specific objectives, including any prespecified hypotheses                                                                                                                           | 7                   |
| <b>Methods</b>            |         |                                                                                                                                                                                            |                     |
| Study design              | 4       | Present key elements of study design early in the paper                                                                                                                                    | 8                   |
| Setting                   | 5       | Describe the setting, locations, and relevant dates, including periods of recruitment, exposure, follow-up, and data collection                                                            | 8                   |
|                           |         | (a) <i>Cohort study</i> —Give the eligibility criteria, and the sources and methods of selection of participants. Describe methods of follow-up                                            |                     |
| Participants              | 6       | <i>Case-control study</i> —Give the eligibility criteria, and the sources and methods of case ascertainment and control selection. Give the rationale for the choice of cases and controls | 8                   |
|                           |         | <i>Cross-sectional study</i> —Give the eligibility criteria, and the sources and methods of selection of participants                                                                      |                     |
| Variables                 | 7       | (b) <i>Cohort study</i> —For matched studies, give matching criteria and number of exposed and unexposed                                                                                   | Not                 |
|                           |         | <i>Case-control study</i> —For matched studies, give matching criteria and the number of controls per case                                                                                 | Applicable          |
|                           |         | Clearly define all outcomes, exposures, predictors, potential confounders, and effect modifiers. Give diagnostic criteria, if applicable                                                   | 8,9                 |
| Data sources/measurement  | 8*      | For each variable of interest, give sources of data and details of methods of assessment (measurement). Describe comparability of assessment methods if there is more than one group       | 8,9                 |
| Bias                      | 9       | Describe any efforts to address potential sources of bias                                                                                                                                  | 8                   |
| Study size                | 10      | Explain how the study size was arrived at                                                                                                                                                  | 8                   |
| Quantitative variables    | 11      | Explain how quantitative variables were handled in the analyses. If applicable, describe which groupings were chosen and why                                                               | 8                   |
|                           |         | (a) Describe all statistical methods, including those used to control for confounding                                                                                                      | 9                   |
|                           |         | (b) Describe any methods used to examine subgroups and interactions                                                                                                                        | 9                   |
|                           |         | (c) Explain how missing data were addressed                                                                                                                                                | 8                   |
|                           |         | (d) <i>Cohort study</i> —If applicable, explain how loss to follow-up was addressed                                                                                                        |                     |
| Statistical methods       | 12      | <i>Case-control study</i> —If applicable, explain how matching of cases and controls was addressed                                                                                         | 9                   |
|                           |         | <i>Cross-sectional study</i> —If applicable, describe analytical methods taking account of sampling strategy                                                                               |                     |
|                           |         | (e) Describe any sensitivity analyses                                                                                                                                                      | 9                   |

| Section/Topic            | Item No | Recommendation                                                                                                                                                                                               | Reported on Page No |
|--------------------------|---------|--------------------------------------------------------------------------------------------------------------------------------------------------------------------------------------------------------------|---------------------|
| <b>Results</b>           |         |                                                                                                                                                                                                              |                     |
| Participants             | 13*     | (a) Report numbers of individuals at each stage of study—eg numbers potentially eligible, examined for eligibility, confirmed eligible, included in the study, completing follow-up, and analysed            | 8                   |
|                          |         | (b) Give reasons for non-participation at each stage                                                                                                                                                         | 8                   |
|                          |         | (c) Consider use of a flow diagram                                                                                                                                                                           | 8                   |
| Descriptive data         | 14*     | (a) Give characteristics of study participants (eg demographic, clinical, social) and information on exposures and potential confounders                                                                     | 9                   |
|                          |         | (b) Indicate number of participants with missing data for each variable of interest                                                                                                                          | 8                   |
|                          |         | (c) <i>Cohort study</i> —Summarise follow-up time (eg, average and total amount)                                                                                                                             | Not Applicable      |
| Outcome data             | 15*     | <i>Cohort study</i> —Report numbers of outcome events or summary measures over time                                                                                                                          | Not Applicable      |
|                          |         | <i>Case-control study</i> —Report numbers in each exposure category, or summary measures of exposure                                                                                                         | Not Applicable      |
|                          |         | <i>Cross-sectional study</i> —Report numbers of outcome events or summary measures                                                                                                                           | 9                   |
| Main results             | 16      | (a) Give unadjusted estimates and, if applicable, confounder-adjusted estimates and their precision (eg, 95% confidence interval). Make clear which confounders were adjusted for and why they were included | 10                  |
|                          |         | (b) Report category boundaries when continuous variables were categorized                                                                                                                                    | 10                  |
|                          |         | (c) If relevant, consider translating estimates of relative risk into absolute risk for a meaningful time period                                                                                             | Not Applicable      |
| Other analyses           | 17      | Report other analyses done—eg analyses of subgroups and interactions, and sensitivity analyses                                                                                                               | 10,11               |
| <b>Discussion</b>        |         |                                                                                                                                                                                                              |                     |
| Key results              | 18      | Summarise key results with reference to study objectives                                                                                                                                                     | 12                  |
| Limitations              | 19      | Discuss limitations of the study, taking into account sources of potential bias or imprecision. Discuss both direction and magnitude of any potential bias                                                   | 13                  |
| Interpretation           | 20      | Give a cautious overall interpretation of results considering objectives, limitations, multiplicity of analyses, results from similar studies, and other relevant evidence                                   | 12                  |
| Generalisability         | 21      | Discuss the generalisability (external validity) of the study results                                                                                                                                        | 13                  |
| <b>Other Information</b> |         |                                                                                                                                                                                                              |                     |

|   |         |    |                                                                                                                                                               |   |
|---|---------|----|---------------------------------------------------------------------------------------------------------------------------------------------------------------|---|
| 1 | Funding | 22 | Give the source of funding and the role of the funders for the present study and, if applicable, for the original study on which the present article is based | 2 |
|---|---------|----|---------------------------------------------------------------------------------------------------------------------------------------------------------------|---|

---

3 *\*Give information separately for cases and controls in case-control studies and, if applicable, for exposed and unexposed groups in cohort and cross-sectional studies.*

4 **Note:** An Explanation and Elaboration article discusses each checklist item and gives methodological background and published examples of transparent reporting. The STROBE checklist is

5 best used in conjunction with this article (freely available on the Web sites of PLoS Medicine at <http://www.plosmedicine.org/>, Annals of Internal Medicine at <http://www.annals.org/>, and

6 Epidemiology at <http://www.epidem.com/>). Information on the STROBE Initiative is available at [www.strobe-statement.org](http://www.strobe-statement.org).

7  
8  
9  
10  
11  
12  
13  
14  
15  
16  
17  
18  
19  
20  
21  
22  
23  
24  
25  
26  
27  
28  
29  
30  
31  
32  
33  
34  
35  
36  
37  
38  
39  
40  
41  
42  
43  
44  
45  
46  
47

For peer review only

# BMJ Open

## Prevalence of hyperuricemia in an eastern Chinese population: a cross-sectional study

|                                 |                                                                                                                                                                                                                                                                                                                                                                                                                                                                                                                                                                                                                                                                                                                                                                                 |
|---------------------------------|---------------------------------------------------------------------------------------------------------------------------------------------------------------------------------------------------------------------------------------------------------------------------------------------------------------------------------------------------------------------------------------------------------------------------------------------------------------------------------------------------------------------------------------------------------------------------------------------------------------------------------------------------------------------------------------------------------------------------------------------------------------------------------|
| Journal:                        | <i>BMJ Open</i>                                                                                                                                                                                                                                                                                                                                                                                                                                                                                                                                                                                                                                                                                                                                                                 |
| Manuscript ID                   | bmjopen-2019-035614.R2                                                                                                                                                                                                                                                                                                                                                                                                                                                                                                                                                                                                                                                                                                                                                          |
| Article Type:                   | Original research                                                                                                                                                                                                                                                                                                                                                                                                                                                                                                                                                                                                                                                                                                                                                               |
| Date Submitted by the Author:   | 03-Mar-2020                                                                                                                                                                                                                                                                                                                                                                                                                                                                                                                                                                                                                                                                                                                                                                     |
| Complete List of Authors:       | Han, Bing; Shanghai 9th Peoples Hospital Affiliated to Shanghai Jiaotong University School of Medicine<br>Wang, Ningjian; Shanghai 9th Peoples Hospital Affiliated to Shanghai Jiaotong University School of Medicine<br>Chen, Yi; Shanghai 9th Peoples Hospital Affiliated to Shanghai Jiaotong University School of Medicine<br>Li, Qin; Shanghai 9th Peoples Hospital Affiliated to Shanghai Jiaotong University School of Medicine<br>Zhu, Chunfang ; Shanghai 9th Peoples Hospital Affiliated to Shanghai Jiaotong University School of Medicine<br>Chen, Yingchao; Shanghai 9th Peoples Hospital Affiliated to Shanghai Jiaotong University School of Medicine<br>Lu, Yingli; Shanghai 9th Peoples Hospital Affiliated to Shanghai Jiaotong University School of Medicine |
| <b>Primary Subject Heading</b>: | Diabetes and endocrinology                                                                                                                                                                                                                                                                                                                                                                                                                                                                                                                                                                                                                                                                                                                                                      |
| Secondary Subject Heading:      | Epidemiology                                                                                                                                                                                                                                                                                                                                                                                                                                                                                                                                                                                                                                                                                                                                                                    |
| Keywords:                       | General endocrinology < DIABETES & ENDOCRINOLOGY, EPIDEMIOLOGY, Diabetes & endocrinology < INTERNAL MEDICINE                                                                                                                                                                                                                                                                                                                                                                                                                                                                                                                                                                                                                                                                    |
|                                 |                                                                                                                                                                                                                                                                                                                                                                                                                                                                                                                                                                                                                                                                                                                                                                                 |

SCHOLARONE™  
Manuscripts



I, the Submitting Author has the right to grant and does grant on behalf of all authors of the Work (as defined in the below author licence), an exclusive licence and/or a non-exclusive licence for contributions from authors who are: i) UK Crown employees; ii) where BMJ has agreed a CC-BY licence shall apply, and/or iii) in accordance with the terms applicable for US Federal Government officers or employees acting as part of their official duties; on a worldwide, perpetual, irrevocable, royalty-free basis to BMJ Publishing Group Ltd ("BMJ") its licensees and where the relevant Journal is co-owned by BMJ to the co-owners of the Journal, to publish the Work in this journal and any other BMJ products and to exploit all rights, as set out in our [licence](#).

The Submitting Author accepts and understands that any supply made under these terms is made by BMJ to the Submitting Author unless you are acting as an employee on behalf of your employer or a postgraduate student of an affiliated institution which is paying any applicable article publishing charge ("APC") for Open Access articles. Where the Submitting Author wishes to make the Work available on an Open Access basis (and intends to pay the relevant APC), the terms of reuse of such Open Access shall be governed by a Creative Commons licence – details of these licences and which [Creative Commons](#) licence will apply to this Work are set out in our licence referred to above.

Other than as permitted in any relevant BMJ Author's Self Archiving Policies, I confirm this Work has not been accepted for publication elsewhere, is not being considered for publication elsewhere and does not duplicate material already published. I confirm all authors consent to publication of this Work and authorise the granting of this licence.

1  
2  
3 **1 Prevalence of hyperuricemia in an eastern Chinese population: a cross-sectional**  
4 **2 study**  
5  
6

7 3 Bing Han\*, Ningjian Wang, Yi Chen, Qin Li, Chunfang Zhu, Yingchao Chen and Yingli Lu\*  
8  
9

10 4 Institute and Department of Endocrinology and Metabolism, Shanghai Ninth People's  
11 Hospital Affiliated to Shanghai Jiaotong University School of Medicine, Shanghai, China  
12  
13

14 6  
15  
16 7 Correspondance: Dr Yingli Lu, luyingli2008@126.com and Bing Han,  
17 hanbing1423@163.com.  
18  
19

20 9 Running title: Prevalence of hyperuricemia in China.  
21  
22  
23  
24  
25  
26  
27  
28  
29  
30  
31  
32  
33  
34  
35  
36  
37  
38  
39  
40  
41  
42  
43  
44  
45  
46  
47  
48  
49  
50  
51  
52  
53  
54  
55  
56  
57  
58  
59  
60



1  
2  
3  
4 10 **ABSTRACT**

5 11 **Objectives:** In the past decade, China has been characterized by large-scale urbanization as  
6  
7 12 well as rapid economic growth. The aim of this study was to further investigate the  
8  
9 13 prevalence of hyperuricemia (HUA) in an eastern Chinese population.

10  
11 14 **Design:** Cross-sectional study.

12  
13 15 **Setting:** Survey of Prevalence in East China of Metabolic Diseases and Risk Factors  
14  
15 16 (SPECT-China) study.

16  
17 17 **Participants:** In this study, 12,770 residents from 22 sites in eastern China were recruited.  
18  
19 18 Finally, 9,225 subjects were included.

20  
21 19 **Main outcome measures:** The serum levels of uric acid, fasting plasma glucose (FPG),  
22  
23 20 glycated hemoglobin (HbA1c) and other metabolic parameters were tested. Waist  
24  
25 21 circumference (WC), weight, height and blood pressure were also measured. Questionnaires  
26  
27 22 regarding smoking, drinking, education, etc., were collected from the subjects. HUA was  
28  
29 23 defined as serum UA >420  $\mu\text{mol/L}$  for men and >360  $\mu\text{mol/L}$  for women.

30  
31 24 **Results:** The prevalence of HUA in this eastern Chinese population was 11.3% (9.9, 12.7)  
32  
33 25 overall, 20.7% (17.7, 23.7) in men and 5.6% (4.3, 6.7) in women. The prevalence of HUA in  
34  
35 26 urban subjects was higher than that in rural subjects (12.9 vs. 10.8%,  $P<0.01$ ). The prevalence  
36  
37 27 of HUA was negatively and positively associated with age in men and women, respectively.  
38  
39 28 Residents with high body mass index (BMI) levels had a higher prevalence of HUA. In the  
40  
41 29 logistic regression analysis, male sex, urban residency, total cholesterol (TC), triglyceride  
42  
43 30 (TG), overweight, obesity, systolic blood pressure (SBP) and low economic status were  
44  
45 31 independently correlated with HUA.

46  
47 32 **Conclusions:** The estimated prevalence of HUA in this eastern Chinese population was  
48  
49 33 11.3% (9.9, 12.7) overall and 20.7% (17.7, 23.7) and 5.6% (4.3, 6.7) in men and women,  
50  
51 34 respectively. HUA has gradually become an important public health issue in China.

52  
53 35 **Trial registration:** ChiCTR-ECS-14005052.

54  
55 36 **Keywords:** Prevalence, hyperuricemia, economic growth, public health, risk factors  
56  
57  
58  
59  
60

1  
2  
3  
4 37 **Strengths and limitations of this study**

5 38 This is the largest published hyperuricemia study in an eastern Chinese population.

6  
7 39 This study covers residents from 22 sites in five provinces.

8  
9 40 This is a regional survey instead of a national study.

10  
11 41 We do not consider the influence of diet.  
12  
13  
14  
15  
16  
17  
18  
19  
20  
21  
22  
23  
24  
25  
26  
27  
28  
29  
30  
31  
32  
33  
34  
35  
36  
37  
38  
39  
40  
41  
42  
43  
44  
45  
46  
47  
48  
49  
50  
51  
52  
53  
54  
55  
56  
57  
58  
59  
60

1  
2  
3  
4 42 **Abbreviations:** HUA, hyperuricemia; FPG, fasting plasma glucose; WC; waist  
5  
6 43 circumference; BMI, body mass index; LDL, low-density lipoprotein; TG, triglyceride; HDL,  
7  
8 44 high-density lipoprotein; TC, total cholesterol; HbA1c, Glycated hemoglobin; SBP, systolic  
9  
10 45 blood pressure; DBP, diastolic blood pressure; NAFLD, Nonalcoholic fatty liver disease;  
11  
12 46 CKD, chronic kidney disease; NGT, Normal glucose tolerance; GDP, gross domestic product;  
13  
14 47 HPLC, high-performance liquid chromatography  
15  
16  
17  
18  
19  
20  
21  
22  
23  
24  
25  
26  
27  
28  
29  
30  
31  
32  
33  
34  
35  
36  
37  
38  
39  
40  
41  
42  
43  
44  
45  
46  
47  
48  
49  
50  
51  
52  
53  
54  
55  
56  
57  
58  
59  
60

## 48 Introduction

49 In humans, uric acid (UA) is the end product of purine metabolism and is mainly excreted via  
50 the kidneys. Xanthine oxidoreductase catalyzes two enzymatic reactions, hypoxanthine to  
51 xanthine and xanthine to UA. Several conditions can influence the concentration of serum UA,  
52 including purine-rich food intake, neoplastic disease, cytotoxic drugs, obesity, hypertension,  
53 etc. [1-3].

54 Uric acid is reported to be associated with oxidative stress and inflammation [1, 4]. In  
55 patients with hyperuricemia (HUA), deposition of UA in joints and tissues promotes the  
56 occurrence of gout and chronic nephropathy. HUA has also been reported to be associated  
57 with insulin resistance, nonalcoholic fatty liver disease (NAFLD) [5, 6], metabolic syndrome,  
58 type 2 diabetes, atherosclerosis and coronary heart disease [7-11]. The overall prevalence of  
59 HUA in adults in the United States was 21.4% in 2007-2008 [12]. In Henan Rural Cohort  
60 Study conducted from 2015 to 2017, the crude and age-standardized prevalence of HUA were  
61 10.24% and 12.60%, respectively[13]. In 2017, Chen Y et al found that the prevalence of  
62 HUA was 13.4% in Jidong community of Tangshan City in northern China[14]. In an elderly  
63 Chinese population of 7 areas, the overall prevalence of HUA was 13.1% in 2018 [15]. Liu R  
64 et al [16] also conducted a meta-analysis including 38 regional studies between 2000 and  
65 2014 to determine the prevalence of HUA in mainland China. The pooled prevalence of HUA  
66 was 13.3% (male 19.4% and female 7.9%). These studies were all local or regional  
67 investigations. There were also two national cross-sectional surveys using multistage,  
68 stratified sampling. In 2009-2010, Liu H et al showed the adjusted prevalence of HUA was  
69 8.4% in Chinese adults [17]. Recently, Lu X et al conducted a nationwide survey in 31  
70 provinces in China. The prevalence of HUA were 13.7%-18.8% based on different urine  
71 iodine concentrations[18].

72 In the past decade, China has been characterized by large-scale urbanization. The  
73 percentage of the urban population rose from 18% in 1978 to 56% in 2015 [19]. As serum UA  
74 is closely related to economic development and urbanization [13], it is necessary to  
75 understand the latest prevalence of HUA in China.

76 China is characterized by regional and economic diversity. Eastern China has a relatively  
77 higher economic status than the rest of the country. In the present study, we performed a

1  
2  
3  
4  
5  
6  
7  
8  
9  
10  
11  
12  
13  
14  
15  
16  
17  
18  
19  
20  
21  
22  
23  
24  
25  
26  
27  
28  
29  
30  
31  
32  
33  
34  
35  
36  
37  
38  
39  
40  
41  
42  
43  
44  
45  
46  
47  
48  
49  
50  
51  
52  
53  
54  
55  
56  
57  
58  
59  
60

78 cross-sectional survey to investigate the prevalence of HUA and its risk factors in an eastern  
79 Chinese population.

## 80 **Methods**

### 81 **Study population**

82 Data from the current study are from the Survey of Prevalence in East China of Metabolic  
83 Diseases and Risk Factors (SPECT-China), which is a population-based cross-sectional  
84 survey of the prevalence of metabolic diseases and risk factors in eastern China [20]. The  
85 registration number is ChiCTR-ECS-14005052 ([www.chictr.org](http://www.chictr.org)). In this study, 12,770  
86 residents from 22 sites in Shanghai, Zhejiang, Jiangsu, Anhui and Jiangxi provinces were  
87 enrolled from January 2014 to December 2015 (Supplemental Figure 1). The inclusion and  
88 exclusion criteria were described previously [20]. Chinese citizens more than 18 years old  
89 who had lived in their current area for more than 6 months were selected. We excluded  
90 subjects with severe communication problems, acute illness, or an unwillingness to participate.  
91 We also excluded residents who had no UA data (n=3,535) and chronic kidney disease (CKD)  
92 stage 5 (n=10). Finally, 9,225 subjects were included. This study was approved by the ethics  
93 committee of the Shanghai Ninth People's Hospital affiliated with Shanghai Jiaotong  
94 University School of Medicine. Written consent was obtained from all the participants.

### 96 **Measurements and definition**

97 HUA was defined as serum UA >420  $\mu\text{mol/L}$  for men and >360  $\mu\text{mol/L}$  for women [21].  
98 Blood pressure and heart rate were measured with a sphygmomanometer  
99 (TERUMO-Elemano) three times. The mean of the three records was used in the analysis.  
100 Hypertension was defined as a systolic blood pressure (SBP)  $\geq 140$  mmHg or diastolic blood  
101 pressure (DBP)  $\geq 90$  mmHg or any self-reported history of hypertension. Diabetes was  
102 defined as a self-reported history of diabetes or glycated hemoglobin (HbA1c) levels of 6.5%  
103 or more. Prediabetes was defined as HbA1c concentrations between 5.7% and 6.4%. Normal  
104 glucose tolerance (NGT) was defined as an HbA1c less than 5.7% [22]. Weight and height  
105 were measured wearing light clothing and without shoes. Body mass index (BMI) was  
106 calculated as weight (kg)/height squared ( $\text{m}^2$ ). Overweight was defined as  $24 \text{ kg/m}^2 \leq \text{BMI} < 28$   
107  $\text{kg/m}^2$ . Obesity was defined as  $\text{BMI} \geq 28 \text{ kg/m}^2$ . Waist circumference (WC) was measured at  
108 the level of 1 cm above the umbilicus. Demographic information and lifestyle risk factors  
109 were gathered from standard questionnaires by trained staff. Current smoking was defined as

1  
2  
3  
4 110 having smoked at least 100 cigarettes in one's lifetime and currently smoking cigarettes [23].  
5  
6 111 Current drinking was defined as drinking more than once a month. Current economic status  
7  
8 112 was assessed by the gross domestic product (GDP) per capita of 2013 at each study site. The  
9  
10 113 mean national GDP per capita (6807 US dollars from World Bank) in 2013 was considered  
11  
12 114 the cutoff point for economic status.

13  
14 115

#### 15 116 **Assessment of biochemical indexes**

16  
17 117 Venous blood samples were drawn from all participants after fasting for at least 8 hours and  
18  
19 118 immediately centrifuged (2000 rpm for 15 min) at room temperature. Blood samples were  
20  
21 119 stored at -20°C when collected and shipped by air in dry ice to one central laboratory certified  
22  
23 120 by the College of American Pathologists within 2-4 hours of collection. All plasma and serum  
24  
25 121 samples were frozen at -80°C after laboratory testing. Serum UA was analyzed with a  
26  
27 122 Beckman Coulter AU 680 device with the original kit (Brea, California, USA). The validity  
28  
29 123 and accuracy of UA were 6% and 4%, respectively. Other biochemical indexes were analyzed  
30  
31 124 as described previously [24].

32  
33 125

#### 34 126 **Statistical analysis**

35  
36 127 Statistical analysis was performed using IBM SPSS Statistics, Version 22 (IBM Corporation,  
37  
38 128 Armonk, New York). Demographic and metabolic characteristics are expressed as the mean ±  
39  
40 129 SD for continuous variables and percentages (95% CI) for categorical variables in the overall  
41  
42 130 population and in subgroups of location, age, economic status, BMI and glucose status.  
43  
44 131 Logistic analysis was used to investigate the association of demographic, lifestyle, and  
45  
46 132 metabolic factors with the odds of HUA. According to the 6th national population census data,  
47  
48 133 the proportions of the population in different age groups (<40, 40-60, ≥60) are 57.39%,  
49  
50 134 29.29%, and 13.31% (total); 58.10%, 29.13%, and 12.76% (male); and 56.61%, 29.46%, and  
51  
52 135 13.91% (female), respectively [25]. Thus, we adjusted the prevalence of HUA by these  
53  
54 136 proportions. All analyses were two-sided.  $P < 0.05$  was considered significant.

## 137 **Results**

### 138 **Characteristics of this eastern Chinese population**

139 In our study, we analyzed UA in 9,225 Chinese adults, including 3,682 males (age,  
140 55.57±13.23 y) and 5,543 females (age 54.30±12.82 y). The mean levels of serum UA were  
141 352.12±79.30 nmol/L and 269.29±64.68 nmol/L in males and females, respectively. There  
142 were significant sex differences in blood glucose, blood lipids, UA, BMI, WC and blood  
143 pressure. The prevalence of diabetes and hypertension also showed a significant difference  
144 (Table 1).

### 146 **Metabolic risk factors of this eastern Chinese population**

147 The prevalence of diabetes and hypertension, WC, SBP and BMI increased with age. As BMI  
148 and glucose levels rose, the prevalence of hypertension, WC, SBP, BMI, triglyceride (TG),  
149 FPG, and HbA1c increased. Moreover, people living in rural areas had a higher prevalence of  
150 diabetes, WC, SBP, low-density lipoprotein (LDL), high-density lipoprotein (HDL), total  
151 cholesterol (TC) and HbA1c. People with a high economic status had a higher prevalence of  
152 diabetes, WC, UA, BMI, LDL, FPG, HbA1c and Cr (Tables 2, 3).

### 154 **Estimated prevalence of HUA in this eastern Chinese population**

155 The prevalence of HUA was 12.3% (11.6, 12.9), with 17.9% (16.7, 19.1) and 8.5% (7.8, 9.3)  
156 in males and females, respectively. The prevalence of HUA in urban areas was higher than  
157 that in rural areas (12.9% vs. 10.8%). The prevalence of HUA in developed areas was slightly  
158 higher than that in underdeveloped areas (12.6% vs. 11.8%). As BMI increased, the  
159 prevalence of HUA increased in both men and women. The prevalence of HUA in normal,  
160 prediabetic and diabetic women were 5.7% (4.9, 6.5), 11.6% (10.0, 13.2) and 15.2% (12.5,  
161 17.9) respectively (Table 4). So there was an increased trend of prevalence of HUA in women  
162 with different glucose status. However, this trend was not obvious in men. After adjusting for  
163 the proportions of the population in different age groups, the prevalence of HUA was 11.3%  
164 (9.9, 12.7), with 20.7% (17.7, 23.7) and 5.6% (4.3, 6.7) in males and females, respectively  
165 (Table 4).

166



1  
2  
3  
4 167 **Logistic regression analysis of HUA**

5 168 Male sex, urban residency, increased TC or TG, overweight, obesity, elevated SBP and low  
6  
7 169 economic status were all risk factors for HUA in this eastern Chinese population (Table 5).  
8  
9 170 However, increased age, higher educational status, increased LDL or HDL, current smoking  
10  
11 171 or drinking and elevated DBP were not associated with the risk of HUA.  
12  
13  
14  
15  
16  
17  
18  
19  
20  
21  
22  
23  
24  
25  
26  
27  
28  
29  
30  
31  
32  
33  
34  
35  
36  
37  
38  
39  
40  
41  
42  
43  
44  
45  
46  
47  
48  
49  
50  
51  
52  
53  
54  
55  
56  
57  
58  
59  
60

## 172 Discussion

173 In this eastern Chinese population, the prevalence of HUA was 11.3%, which was similar to  
174 the pooled prevalence reported in a systematic review performed in China (13.3%) [15].  
175 However, this prevalence was more than that in the national HUA survey, which reported that  
176 the prevalence of HUA was 8.4% [13]. The previous survey was performed in 2009-2010.  
177 Our study occurred in 2014-2015. These two studies investigated different populations. In  
178 addition, our prevalence was relatively lower than that in Qingdao, which is close to the sea  
179 and where residents consume high amounts of seafood and beer [26]. Moreover, the  
180 prevalence of HUA in our population was lower than those in the United States and Japan [12,  
181 27], which might be attributed to economic status.

182 The prevalence of HUA in young men (<40 years) was seven times greater than that in  
183 young women. However, as age increased, the prevalence of HUA gradually decreased in  
184 men and increased in women, which was coincident with values previously reported [28]. In  
185 residents more than 60 years of age, men and women had a similar prevalence of HUA. We  
186 deduced that the diet of young men contains more purine than that of old men. The young  
187 men also had an active metabolism. The prevalence of HUA was dramatically increased in  
188 women older than 60 years, which might be caused by reduced estrogen levels.

189 Risk factors for HUA were also evaluated in our study. We found that male sex, urban  
190 residency, hypertriglyceridemia, hypercholesterolemia, overweight, obesity, high SBP and  
191 low economic status were risk factors for HUA. In previous studies, hypertriglyceridemia was  
192 thought to be the strongest risk factor for HUA [28, 29]. However, the OR for HUA was 1.7  
193 times with 1 SD elevation of triglyceridemia. In addition, obesity was the strongest risk factor  
194 (OR=2.874) in our study. China has the largest obese population in the world [30]. In this  
195 case, the prevalence of HUA will increase with the rising trend of obesity. Therefore, we  
196 should pay more attention to prevent its consequences.

197 HUA is closely related to lifestyle and dietary habits. In previous studies, the prevalence of  
198 HUA in urban areas was much greater than that in rural areas [13, 28]. In our study, the  
199 prevalence of HUA in urban areas was mildly elevated (12.9% vs. 10.8%), and urbanization  
200 was a risk factor for HUA. Eastern China is considered the developed area in the whole  
201 country. Therefore, the difference between urban and rural areas was not obvious as in other

1  
2  
3  
4  
5  
6  
7  
8  
9  
10  
11  
12  
13  
14  
15  
16  
17  
18  
19  
20  
21  
22  
23  
24  
25  
26  
27  
28  
29  
30  
31  
32  
33  
34  
35  
36  
37  
38  
39  
40  
41  
42  
43  
44  
45  
46  
47  
48  
49  
50  
51  
52  
53  
54  
55  
56  
57  
58  
59  
60

202 places. Moreover, people with high economic status consumed more healthy food that  
203 contained low purine ingredients. This could partly explain why low economic status became  
204 a risk factor for HUA. In accordance with a previous study, smoking was not associated with  
205 HUA [13]. However, according to a previous study, alcohol intake influences serum UA,  
206 which is different from the results of our study. This difference might have been caused by  
207 our definition of current drinking (current drinking was defined as drinking in the past 1  
208 month), which mixed nonhabitual drinkers and habitual drinkers together.

209 As age increased, UA together with components of metabolic syndrome (FPG, SBP, WC)  
210 also increased, which indicated that there might be a close relationship between metabolic  
211 syndrome and HUA. Other studies have also found that HUA is associated with metabolic  
212 syndrome [31, 32]. An epidemiologic study showed that HUA is positively correlated with  
213 fasting serum insulin [33]. Krishnan et al reported that people with HUA have 1.36 times the  
214 risk of developing insulin resistance in a 15-year follow-up study [34]. Thus, research has  
215 indicated that insulin resistance plays an important role in the relationship between metabolic  
216 syndrome and HUA [35].

217 There were several limitations in our study. First, this was not a national study but a local  
218 survey. Second, we did not consider the influence of diet. Blood was drawn after fasting for  
219 eight hours. However, the diet ingested near the blood drawing time was unknown. In  
220 addition, this was a cross-sectional study. Therefore, we could not identify a causal  
221 relationship between HUA and its risk factors.

222 In this study, we estimated the prevalence of HUA in an eastern Chinese population. To  
223 prevent the prevalence of HUA, more attention should be paid to life status (such as economic  
224 status and residence) and metabolic indexes (TC, TG, BMI, and SBP).

1  
2  
3  
4 225 **Acknowledgments**

5 226 We thank all the participants in the study.

7 227 **Contributors**

9 228 YL and BH designed and supervised this investigation. BH performed this investigation. YC,  
11 229 CFZ and YCC contributed to the data collection. NJW and QL provided technical or material  
13 230 support. All authors read and approved the final manuscript.

15 231 **Funding**

17 232 This study was supported by National Natural Science Foundation of China (91857117,  
19 233 81670717); Science and Technology Commission of Shanghai Municipality (19140902400,  
21 234 18410722300); the Major Science and Technology Innovation Program of Shanghai  
23 235 Municipal Education Commission (2019-01-07-00-01-E00059); Commission of Health and  
25 236 Family Planning of Pudong District (PWZxq2017-17); Municipal Human Resources  
27 237 Development Program for Outstanding Young Talents in Medical and Health Sciences in  
29 238 Shanghai (2017YQ053); Shanghai JiaoTong University School of Medicine (19XJ11007).

31 239 The funders played no role in the design or conduct of the study, collection, management,  
33 240 analysis, or interpretation of data or in the preparation, review, or approval of the article.

35 241 **Competing interests**

37 242 The authors have declared that no competing interests exist.

39 243 **Patient consent for publication**

41 244 Not required

43 245 **Ethical approval**

45 246 The study protocol was approved by the Institutional Review Board of the Shanghai Ninth  
47 247 People's Hospital affiliated with Shanghai Jiaotong University School of Medicine.

49 248 **Provenance and peer review**

51 249 Not commissioned; externally peer reviewed.

53 250 **Data availability statement**

55 251 Data are available upon request to corresponding author.

56  
57  
58  
59  
60

252 **References**

- 253 1. Strazzullo P, Puig JG. Uric acid and oxidative stress: relative impact on cardiovascular  
254 risk? *Nutr Metab Cardiovasc Dis*. 2007;17:409-14.
- 255 2. Strazzullo P, Barba G, Cappuccio FP, et al. Altered renal sodium handling in men with  
256 abdominal adiposity: a link to hypertension. *J Hypertens*. 2001;19:2157-64.
- 257 3. Strazzullo P, Barbato A, Galletti F, et al. Abnormalities of renal sodium handling in the  
258 metabolic syndrome. Results of the Olivetti Heart Study. *J Hypertens*. 2006;24:1633-9.
- 259 4. Kanellis J, Kang DH. Uric acid as a mediator of endothelial dysfunction, inflammation,  
260 and vascular disease. *Semin Nephrol*. 2005;25:39-42.
- 261 5. Xu C, Yu C, Xu L, et al. High serum uric acid increases the risk for nonalcoholic Fatty  
262 liver disease: a prospective observational study. *PLoS One*. 2010;5:e11578.
- 263 6. Ryu S, Chang Y, Kim SG, et al. Serum uric acid levels predict incident nonalcoholic  
264 fatty liver disease in healthy Korean men. *Metabolism*. 2011;60:860-866.
- 265 7. Gustafsson D, Unwin R. The pathophysiology of hyperuricaemia and its possible  
266 relationship to cardiovascular disease, morbidity and mortality. *BMC Nephrol*.  
267 2013;14:164.
- 268 8. Katsiki N, Karagiannis A, Athyros VG, et al. Hyperuricaemia: more than just a cause of  
269 gout? *J Cardiovasc Med (Hagerstown)*. 2013;14:397-402.
- 270 9. Choi HK, Curhan G. Independent impact of gout on mortality and risk for coronary heart  
271 disease. *Circulation*. 2007;116:894-900.
- 272 10. Choi HK, Ford ES. Prevalence of the metabolic syndrome in individuals with  
273 hyperuricemia. *Am J Med*. 2007;120:442-7.
- 274 11. Kim SY, Guevara JP, Kim KM, et al. Hyperuricemia and coronary heart disease: a  
275 systematic review and meta-analysis. *Arthritis Care Res (Hoboken)*. 2010;62:170-80.
- 276 12. Zhu Y, Pandya BJ, Choi HK. Prevalence of gout and hyperuricemia in the US general  
277 population: the National Health and Nutrition Examination Survey 2007-2008. *Arthritis*  
278 *Rheum*. 2011;63:3136-41.
- 279 13. Dong X, Zhang H, Wang F, et al. Epidemiology and prevalence of hyperuricemia among  
280 men and women in Chinese rural population: The Henan Rural Cohort Study. *Mod*  
281 *Rheumatol*. 2019:1-11.

- 1  
2  
3  
4 282 14. Chen Y, Xia Y, Han X, et al. Association between serum uric acid and atrial fibrillation:  
5 283 a cross-sectional community-based study in China. *BMJ Open*. 2017;7:e019037.
- 6  
7 284 15. Wang R, Tang Z, Sun F, Diao LJ. Prevalence of hyperuricemia in the elderly in 7 areas  
8 285 of China. *Zhonghua Liu Xing Bing Xue Za Zhi*. 2018;39:286-8.
- 9  
10 286 16. Liu R, Han C, Wu D, et al. Prevalence of Hyperuricemia and Gout in Mainland China  
11 287 from 2000 to 2014: A Systematic Review and Meta-Analysis. *Biomed Res Int*.  
12 288 2015;2015:762820.
- 13  
14 289 17. Liu H, Zhang XM, Wang YL, et al. Prevalence of hyperuricemia among Chinese adults:  
15 290 a national cross-sectional survey using multistage, stratified sampling. *J Nephrol*.  
16 291 2014;27:653-8.
- 17  
18 292 18. Lu X, Shi X, Li Y, et al. A negative association between urinary iodine concentration  
19 293 and the prevalence of hyperuricemia and gout: a cross-sectional and population-based  
20 294 study in Mainland China. *Eur J Nutr*. 2020 Feb 20.
- 21  
22 295 19. China National Bureau of Statistics, 2016. Statistical Communiqué of China on  
23 296 2015 National Economic and Social Development. Retrieved from:  
24 297 [http://www.stats.gov.cn/tjsj/zxfb/201602/t20160229\\_1323991.html](http://www.stats.gov.cn/tjsj/zxfb/201602/t20160229_1323991.html) .
- 25  
26 298 20. Wang N, Shao H, Chen Y, et al. Follicle-Stimulating Hormone, Its Association with  
27 299 Cardiometabolic Risk Factors, and 10-Year Risk of Cardiovascular Disease in  
28 300 Postmenopausal Women. *J Am Heart Assoc*. 2017;6. pii: e005918.
- 29  
30 301 21. Cai Z, Xu X, Wu X, et al. Hyperuricemia and the metabolic syndrome in Hangzhou. *Asia*  
31 302 *Pac J Clin Nutr*. 2009;18:81-7.
- 32  
33 303 22. American Diabetes Association. Diagnosis and classification of diabetes mellitus.  
34 304 *Diabetes Care*. 2010; 33: S62–S69.
- 35  
36 305 23. Xu Y, Wang L, He J, et al. Prevalence and control of diabetes in Chinese adults. *JAMA*.  
37 306 2013;310:948-59.
- 38  
39 307 24. Han B, Wang X, Wang N, et al. Investigation of vitamin D status and its correlation with  
40 308 insulin resistance in a Chinese population. *Public Health Nutr*. 2017;20:1602-8.
- 41  
42 309 25. Tabulation on the 2010 Population Census of the People's Republic of China.[Internet]  
43 310 Available: <http://www.stats.gov.cn/tjsj/pcsj/rkpc/6rp/indexce.htm>
- 44  
45 311 26. Dong Y, Nan H, Gao W. Prevalence of the metabolic syndrome among adults aged

- 1  
2  
3  
4 312 20–74 years in Zhanshan community of Qingdao. *Chinese Journal of Diabetes*.  
5 313 2004;12:177-81.  
6  
7 314 27. Nagahama K, Iseki K, Inoue T, et al. Hyperuricemia and cardiovascular risk factor  
8  
9 315 clustering in a screened cohort in Okinawa, Japan. *Hypertens Res*. 2004;27(4):227-33.  
10  
11 316 28. Yang J, Liu Z, Zhang C, et al. The prevalence of hyperuricemia and its correlates in an  
12  
13 317 inland Chinese adult population, urban and rural of Jinan. *Rheumatol Int*.  
14  
15 318 2013;33:1511-7.  
16  
17 319 29. Miao Z, Li C, Chen Y, et al. Dietary and lifestyle changes associated with high  
18  
19 320 prevalence of hyperuricemia and gout in the Shandong coastal cities of Eastern China. *J*  
20  
21 321 *Rheumatol*. 2008;35:1859-64.  
22  
23 322 30. NCD Risk Factor Collaboration (NCD-RisC). Trends in adult body-mass index in 200  
24  
25 323 countries from 1975 to 2014: a pooled analysis of 1698 population-based measurement  
26  
27 324 studies with 19·2 million participants. *Lancet*. 2016;387:1377-96.  
28  
29 325 31. Lim JH, Kim YK, Kim YS, et al. Relationship between serum uric Acid levels,  
30  
31 326 metabolic syndrome, and arterial stiffness in korean. *Korean Circ J*. 2010;40:314-20.  
32  
33 327 32. Lin SD, Tsai DH, Hsu SR. Association between serum uric acid level and components of  
34  
35 328 the metabolic syndrome. *J Chin Med Assoc*. 2006;69:512-6.  
36  
37 329 33. Yoo TW, Sung KC, Shin HS, et al. Relationship between serum uric acid concentration  
38  
39 330 and insulin resistance and metabolic syndrome. *Circ J*. 2005;69:928-33.  
40  
41 331 34. Krishnan E, Pandya BJ, Chung L, et al. Hyperuricemia in young adults and risk of  
42  
43 332 insulin resistance, prediabetes, and diabetes: a 15-year follow-up study. *Am J Epidemiol*.  
44  
45 333 2012;176:108-16.  
46  
47 334 35. Li C, Hsieh MC, Chang SJ. Metabolic syndrome, diabetes, and hyperuricemia. *Curr Opin*  
48  
49 335 *Rheumatol*. 2013;25:210-6.  
50  
51  
52  
53  
54  
55  
56  
57  
58  
59  
60

1  
2  
3  
4 336 **Figure legend**

5 337 **Supplemental Figure 1** Position of the 5 provinces and 22 sites in China.

6  
7 338 Residents from 22 sites in Shanghai, Zhejiang, Jiangsu, Anhui and Jiangxi provinces were

8  
9 339 enrolled in SPECT-China study.  
10  
11  
12  
13  
14  
15  
16  
17  
18  
19  
20  
21  
22  
23  
24  
25  
26  
27  
28  
29  
30  
31  
32  
33  
34  
35  
36  
37  
38  
39  
40  
41  
42  
43  
44  
45  
46  
47  
48  
49  
50  
51  
52  
53  
54  
55  
56  
57  
58  
59  
60



1  
2  
3  
4  
5  
6  
7  
8  
9  
10  
11  
12  
13  
14  
15  
16  
17  
18  
19  
20  
21  
22  
23  
24  
25  
26  
27  
28  
29  
30  
31  
32  
33  
34  
35  
36  
37  
38  
39  
40  
41  
42  
43  
44  
45  
46  
47  
48  
49  
50  
51  
52  
53  
54  
55  
56  
57  
58  
59  
60

340 **Table 1** Baseline characteristics between different groups.

| Variables             | Men (n=3682) | Women (n=5543) | P value |
|-----------------------|--------------|----------------|---------|
| Age y                 | 55.57±13.23  | 54.30±12.82    | <0.001  |
| FPG mmol/L            | 5.72±1.63    | 5.50±1.36      | <0.001  |
| HbA1c %               | 5.78±1.08    | 5.64±0.92      | <0.001  |
| TG mmol/L             | 1.88±1.79    | 1.55±1.20      | <0.001  |
| TC mmol/L             | 5.14±1.13    | 5.27±1.15      | <0.001  |
| LDL mmol/L            | 3.23±0.77    | 3.30±0.83      | <0.001  |
| HDL mmol/L            | 1.30±0.31    | 1.45±0.32      | <0.001  |
| UA umol/L             | 352.1±79.3   | 269.3±64.7     | <0.001  |
| BMI kg/m <sup>2</sup> | 25.11±3.45   | 24.40±3.67     | <0.001  |
| WC cm                 | 85.85±9.42   | 78.72±9.90     | <0.001  |
| SBP mmHg              | 134.3±20.7   | 131.1±22.2     | <0.001  |
| DBP mmHg              | 82.1±12.9    | 77.8±12.9      | <0.001  |
| Diabetes %            | 16.3%        | 12.7%          | <0.001  |
| Hypertension %        | 53.4%        | 44.1%          | <0.001  |

341 Uric acid: UA; Fasting plasma glucose: FPG; Alanine aminotransferase: ALT; Triglycerides: TG;

342 Total cholesterol: TC; Body mass index: BMI; Waist circumference: WC; Systolic blood pressure:

343 SBP; Diastolic blood pressure: DBP

**Table 2** Characteristics of Eastern Chinese population.

|                 | Percentage % (95%CI) |                   |                   |                   | Means $\pm$ SD    |                  |                  |
|-----------------|----------------------|-------------------|-------------------|-------------------|-------------------|------------------|------------------|
|                 | Diabetes             | Hypertension      | Smoking           | Drinking          | WC                | SBP              | BMI              |
| Overall         | 14.1 (13.4, 14.8)    | 47.8 (46.8, 48.9) | 19.2 (18.3, 20.0) | 55.8 (54.8, 56.9) | 81.57 $\pm$ 10.32 | 132.4 $\pm$ 21.7 | 24.68 $\pm$ 3.60 |
| Location        |                      |                   |                   |                   |                   |                  |                  |
| Rural           | 15.8 (14.4, 17.2)    | 58.7 (56.8, 60.6) | 22.9 (21.3, 24.5) | 56.6 (54.7, 58.5) | 83.14 $\pm$ 10.38 | 139.7 $\pm$ 23.2 | 24.71 $\pm$ 3.65 |
| Urban           | 13.4 (12.6, 14.2)    | 43.3 (42.1, 44.5) | 17.6 (16.7, 18.6) | 55.5 (54.3, 56.7) | 80.90 $\pm$ 10.23 | 129.4 $\pm$ 20.3 | 24.67 $\pm$ 3.58 |
| Age groups      |                      |                   |                   |                   |                   |                  |                  |
| <40             | 1.6 (0.9, 2.3)       | 11.1 (9.4, 12.9)  | 12.9 (11.0, 14.8) | 42.0 (39.2, 44.7) | 75.22 $\pm$ 10.55 | 116.8 $\pm$ 15.0 | 23.38 $\pm$ 3.61 |
| 40-60           | 11.3 (10.3, 12.2)    | 41.8 (40.3, 43.3) | 20.8 (19.6, 22.0) | 54.9 (53.4, 56.5) | 80.78 $\pm$ 9.87  | 129.5 $\pm$ 20.1 | 24.82 $\pm$ 3.35 |
| $\geq$ 60       | 21.5 (20.2, 22.9)    | 67.1 (65.6, 68.7) | 19.4 (18.1, 20.7) | 61.5 (59.9, 63.1) | 84.60 $\pm$ 9.59  | 141.0 $\pm$ 21.5 | 24.96 $\pm$ 3.79 |
| Economic status |                      |                   |                   |                   |                   |                  |                  |
| low             | 12.3 (11.3, 13.3)    | 47.8 (46.3, 49.4) | 21.2 (19.9, 22.5) | 46.6 (45.1, 48.2) | 81.07 $\pm$ 10.57 | 134.2 $\pm$ 23.5 | 24.50 $\pm$ 3.55 |
| high            | 15.6 (14.6, 16.6)    | 47.8 (46.4, 49.2) | 17.6 (16.5, 18.6) | 62.9 (61.6, 64.3) | 81.96 $\pm$ 10.10 | 131.0 $\pm$ 20.1 | 24.83 $\pm$ 3.64 |
| BMI             |                      |                   |                   |                   |                   |                  |                  |
| <24             | 9.8 (8.9, 10.7)      | 35.2 (33.7, 36.7) | 16.6 (15.4, 17.7) | 52.9 (51.3, 54.5) | 74.72 $\pm$ 7.85  | 126.9 $\pm$ 21.1 | 21.67 $\pm$ 1.69 |
| 24-28           | 15.2 (14.0, 16.4)    | 53.0 (51.4, 54.7) | 20.6 (19.2, 21.9) | 58.3 (56.7, 59.9) | 84.57 $\pm$ 7.30  | 135.2 $\pm$ 21.2 | 25.79 $\pm$ 1.12 |
| $\geq$ 28       | 24.1 (21.8, 26.3)    | 69.1 (66.7, 71.5) | 22.8 (20.6, 25.0) | 57.6 (55.0, 60.2) | 93.34 $\pm$ 8.52  | 140.5 $\pm$ 20.2 | 30.40 $\pm$ 3.09 |
| Glucose status  |                      |                   |                   |                   |                   |                  |                  |
| normal          | -                    | 37.0 (35.6, 38.3) | 16.2 (15.1, 17.2) | 50.6 (49.3, 52.0) | 78.95 $\pm$ 9.88  | 128.0 $\pm$ 20.6 | 24.08 $\pm$ 3.44 |
| prediabetes     | -                    | 57.6 (55.7, 59.5) | 23.4 (21.7, 25.0) | 63.2 (61.3, 65.1) | 83.90 $\pm$ 9.53  | 136.7 $\pm$ 21.6 | 25.26 $\pm$ 3.55 |
| diabetes        | -                    | 72.7 (70.3, 75.2) | 23.0 (20.6, 25.3) | 61.3 (58.7, 64.0) | 87.60 $\pm$ 9.97  | 141.9 $\pm$ 21.2 | 26.00 $\pm$ 3.78 |

1  
2  
3  
4  
5  
6  
7  
8  
9  
10  
11  
12  
13  
14  
15  
16  
17  
18  
19  
20  
21  
22  
23  
24  
25  
26  
27  
28  
29  
30  
31  
32  
33  
34  
35  
36  
37  
38  
39  
40  
41  
42  
43  
44  
45  
46

Body mass index: BMI; Waist circumference: WC; Systolic blood pressure: SBP

**Table 3** Biochemical index of Eastern Chinese population.

|                 | Means $\pm$ SD    |                  |                 |                  |                 |                  |                  |                    |
|-----------------|-------------------|------------------|-----------------|------------------|-----------------|------------------|------------------|--------------------|
|                 | UA                | LDL              | TG              | HDL              | TC              | FPG              | HbA1c            | Creatinine         |
| Overall         | 302.0 $\pm$ 81.5  | 3.28 $\pm$ 0.81  | 1.68 $\pm$ 1.48 | 1.39 $\pm$ 0.32  | 5.22 $\pm$ 1.14 | 5.58 $\pm$ 1.48  | 5.70 $\pm$ 0.99  | 77.31 $\pm$ 14.96  |
| Location        |                   |                  |                 |                  |                 |                  |                  |                    |
| Rural           | 294.8 $\pm$ 83.0  | 3.38 $\pm$ 0.83  | 1.69 $\pm$ 1.56 | 1.44 $\pm$ 0.31  | 5.37 $\pm$ 1.07 | 5.63 $\pm$ 1.60  | 5.80 $\pm$ 1.03  | 73.76 $\pm$ 14.20  |
| Urban           | 305.6 $\pm$ 80.9  | 3.23 $\pm$ 0.80  | 1.67 $\pm$ 1.43 | 1.37 $\pm$ 0.33  | 5.16 $\pm$ 1.17 | 5.57 $\pm$ 1.42  | 5.65 $\pm$ 0.96  | 78.87 $\pm$ 15.13  |
| Age groups      |                   |                  |                 |                  |                 |                  |                  |                    |
| <40             | 294.1 $\pm$ 85.7  | 2.81 $\pm$ 0.65  | 1.35 $\pm$ 1.25 | 1.39 $\pm$ 0.30  | 4.60 $\pm$ 0.87 | 4.98 $\pm$ 0.76  | 5.09 $\pm$ 0.57  | 75.82 $\pm$ 14.73  |
| 40-60           | 298.0 $\pm$ 82.8  | 3.29 $\pm$ 0.78  | 1.76 $\pm$ 1.71 | 1.39 $\pm$ 0.32  | 5.24 $\pm$ 1.16 | 5.52 $\pm$ 1.46  | 5.62 $\pm$ 0.94  | 76.26 $\pm$ 14.59  |
| $\geq$ 60       | 310.1 $\pm$ 78.3  | 3.42 $\pm$ 0.83  | 1.69 $\pm$ 1.20 | 1.38 $\pm$ 0.34  | 5.39 $\pm$ 1.13 | 5.86 $\pm$ 1.60  | 5.98 $\pm$ 1.04  | 79.09 $\pm$ 15.47  |
| Economic status |                   |                  |                 |                  |                 |                  |                  |                    |
| low             | 299.8 $\pm$ 85.1  | 3.23 $\pm$ 0.82  | 1.70 $\pm$ 1.65 | 1.45 $\pm$ 0.32  | 5.20 $\pm$ 1.05 | 5.54 $\pm$ 1.48  | 5.62 $\pm$ 0.99  | 76.29 $\pm$ 15.23  |
| high            | 304.4 $\pm$ 78.7* | 3.31 $\pm$ 0.80* | 1.66 $\pm$ 1.31 | 1.34 $\pm$ 0.32* | 5.23 $\pm$ 1.21 | 5.62 $\pm$ 1.47* | 5.75 $\pm$ 0.98* | 78.20 $\pm$ 14.83* |
| BMI             |                   |                  |                 |                  |                 |                  |                  |                    |
| <24             | 279.5 $\pm$ 73.3  | 3.15 $\pm$ 0.80  | 1.35 $\pm$ 1.05 | 1.48 $\pm$ 0.33  | 5.11 $\pm$ 1.09 | 5.39 $\pm$ 1.35  | 5.53 $\pm$ 0.92  | 75.83 $\pm$ 14.26  |
| 24-28           | 313.9 $\pm$ 81.7  | 3.36 $\pm$ 0.81  | 1.85 $\pm$ 1.50 | 1.33 $\pm$ 0.30  | 5.28 $\pm$ 1.18 | 5.64 $\pm$ 1.47  | 5.76 $\pm$ 0.99  | 78.34 $\pm$ 15.37  |
| $\geq$ 28       | 335.5 $\pm$ 85.3  | 3.44 $\pm$ 0.80  | 2.20 $\pm$ 2.13 | 1.27 $\pm$ 0.28  | 5.39 $\pm$ 1.17 | 6.00 $\pm$ 1.74  | 6.02 $\pm$ 1.10  | 78.95 $\pm$ 15.44  |
| Glucose status  |                   |                  |                 |                  |                 |                  |                  |                    |
| normal          | 294.9 $\pm$ 81.3  | 3.12 $\pm$ 0.76  | 1.54 $\pm$ 1.38 | 1.41 $\pm$ 0.32  | 5.05 $\pm$ 1.10 | 5.09 $\pm$ 0.54  | 5.16 $\pm$ 0.36  | 76.81 $\pm$ 14.77  |
| prediabetes     | 313.1 $\pm$ 81.1  | 3.51 $\pm$ 0.81  | 1.71 $\pm$ 1.17 | 1.38 $\pm$ 0.32  | 5.49 $\pm$ 1.12 | 5.45 $\pm$ 0.72  | 5.93 $\pm$ 0.20  | 77.95 $\pm$ 14.83  |
| diabetes        | 310.9 $\pm$ 81.2  | 3.42 $\pm$ 0.86  | 2.18 $\pm$ 2.14 | 1.29 $\pm$ 0.32  | 5.38 $\pm$ 1.21 | 7.89 $\pm$ 2.63  | 7.38 $\pm$ 1.49  | 78.22 $\pm$ 16.38  |

1  
2  
3  
4  
5  
6  
7  
8  
9  
10  
11  
12  
13  
14  
15  
16  
17  
18  
19  
20  
21  
22  
23  
24  
25  
26  
27  
28  
29  
30  
31  
32  
33  
34  
35  
36  
37  
38  
39  
40  
41  
42  
43  
44  
45  
46  
47  
48  
49  
50  
51  
52  
53  
54  
55  
56  
57  
58  
59  
60

Uric acid: UA; Triglycerides: TG; Total cholesterol: TC; Low-density lipoprotein: LDL;  
High-density lipoprotein: HDL; Glycated hemoglobin: HbA1c; Fasting plasma glucose: FPG

**Table 4** Estimated prevalence of HUA in Eastern Chinese population.

|                 | Percentage % (95%CI) |                   |                   |
|-----------------|----------------------|-------------------|-------------------|
|                 | Overall              | Men               | Women             |
| Overall         | 12.3 (11.6, 12.9)    | 17.9 (16.7-19.1)  | 8.5 (7.8-9.3)     |
| Overall*        | 11.3 (9.9, 12.7)     | 20.7 (17.7, 23.7) | 5.6 (4.3, 6.7)    |
| Location        |                      |                   |                   |
| Urban           | 12.9 (12.1, 13.7)    | 19.1 (17.6-20.7)  | 8.9 (8.0-9.8)     |
| Rural           | 10.8 (9.6, 12.0)     | 15.2 (13.1-17.3)  | 7.7 (6.4-9.0)     |
| Age groups      |                      |                   |                   |
| <40             | 10.8 (9.0, 12.5)     | 22.8 (19.0, 26.6) | 3.3 (2.0, 4.5)    |
| 40-60           | 11.2 (10.3, 12.2)    | 18.9 (17.0, 20.8) | 6.5 (5.5, 7.4)    |
| ≥60             | 13.9 (12.8, 15.0)    | 15.4 (13.6, 17.2) | 12.8 (11.4, 14.2) |
| Economic status |                      |                   |                   |
| low             | 11.8 (10.9-12.8)     | 18.3 (16.5-20.1)  | 7.2 (6.1-8.2)     |
| high            | 12.6 (11.7-13.5)     | 17.5 (15.8-19.2)  | 9.5 (8.5-10.6)    |
| BMI             |                      |                   |                   |
| <24             | 6.7 (5.9, 7.5)       | 10.5 (8.9, 12.2)  | 4.8 (3.9, 5.6)    |
| 24-28           | 14.1 (13.0, 15.3)    | 19.9 (18.0, 21.9) | 9.4 (8.1, 10.7)   |
| ≥28             | 22.5 (20.3, 24.6)    | 27.3 (23.9, 30.8) | 18.5 (15.7, 21.2) |
| Glucose status  |                      |                   |                   |
| normal          | 10.1 (9.3-10.9)      | 17.5 (15.8-19.2)  | 5.7 (4.9-6.5)     |
| prediabetes     | 15.2 (13.9-16.6)     | 20.3 (17.9-22.7)  | 11.6 (10.0-13.2)  |
| diabetes        | 15.1 (13.1-17.0)     | 15.0 (12.1-17.8)  | 15.2 (12.5-17.9)  |

Body mass index: BMI

\* standardized by proportions of population of 6th national population census data

**Table 5** Risk factors for HUA in Eastern Chinese population.

| Risk factors                    | OR    | (95%CI)      |
|---------------------------------|-------|--------------|
| Female sex                      | 0.510 | 0.427, 0.609 |
| Age per 10 years                | 1.041 | 0.976, 1.112 |
| Urban residency                 | 2.218 | 1.681, 2.927 |
| ≥Junior middle school education | 1.042 | 0.866, 1.253 |
| Lipids                          |       |              |
| LDL per 1SD                     | 1.018 | 0.888, 1.168 |
| HDL per 1SD                     | 0.936 | 0.850, 1.032 |
| TC per 1SD                      | 1.226 | 1.050, 1.432 |
| TG per 1SD                      | 1.672 | 1.491, 1.875 |
| Current smoking                 | 0.942 | 0.778, 1.141 |
| Current drinking                | 0.913 | 0.784, 1.062 |
| BMI                             |       |              |
| Overweight                      | 1.772 | 1.481, 2.120 |
| Obesity                         | 2.874 | 2.338, 3.532 |
| Blood pressure                  |       |              |
| SBP per 10mmHg                  | 1.055 | 1.009, 1.103 |
| DBP per 10mmHg                  | 1.012 | 0.944, 1.085 |
| High economic status            | 0.688 | 0.538, 0.879 |

Data are expressed as unStandardized B (95%CI). The enter procedure was used.

Body mass index: BMI

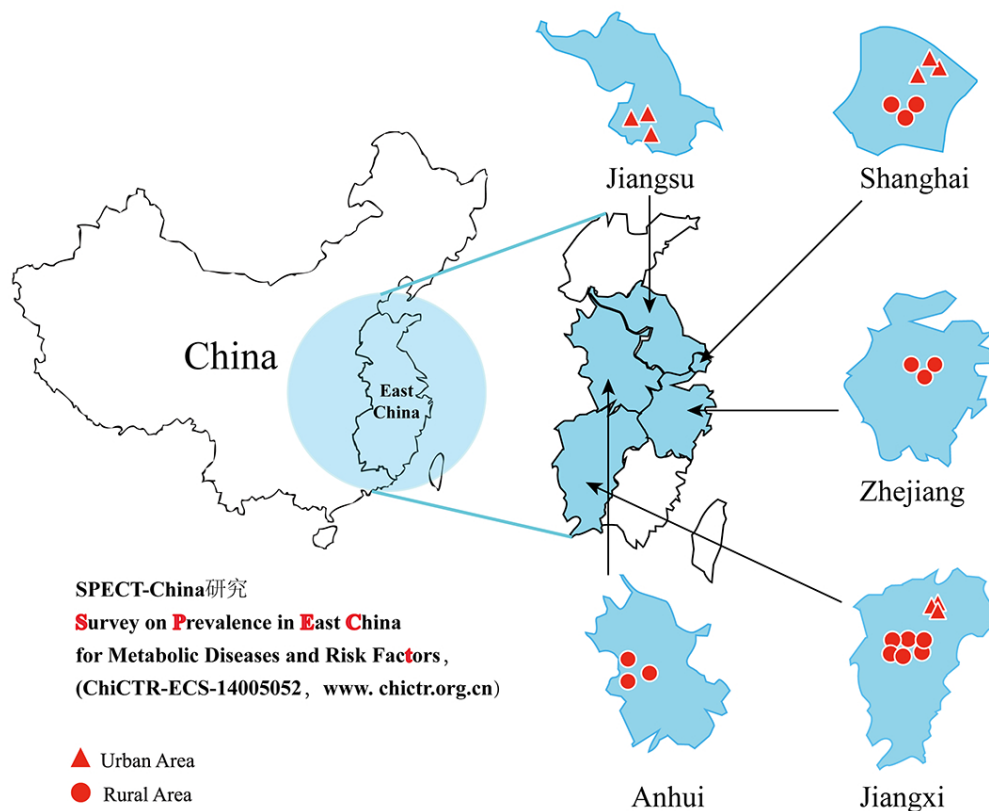



## STROBE Statement

Checklist of items that should be included in reports of observational studies

| Section/Topic                                                                                                | Item No | Recommendation                                                                                                                                                                             | Reported on Page No |
|--------------------------------------------------------------------------------------------------------------|---------|--------------------------------------------------------------------------------------------------------------------------------------------------------------------------------------------|---------------------|
| Title and abstract                                                                                           | 1       | (a) Indicate the study's design with a commonly used term in the title or the abstract                                                                                                     | 1,2                 |
|                                                                                                              |         | (b) Provide in the abstract an informative and balanced summary of what was done and what was found                                                                                        | 1,2                 |
| <b>Introduction</b>                                                                                          |         |                                                                                                                                                                                            |                     |
| Background/rationale                                                                                         | 2       | Explain the scientific background and rationale for the investigation being reported                                                                                                       | 5                   |
| Objectives                                                                                                   | 3       | State specific objectives, including any prespecified hypotheses                                                                                                                           | 5                   |
| <b>Methods</b>                                                                                               |         |                                                                                                                                                                                            |                     |
| Study design                                                                                                 | 4       | Present key elements of study design early in the paper                                                                                                                                    | 7                   |
| Setting                                                                                                      | 5       | Describe the setting, locations, and relevant dates, including periods of recruitment, exposure, follow-up, and data collection                                                            | 7                   |
| Participants                                                                                                 | 6       | (a) <i>Cohort study</i> —Give the eligibility criteria, and the sources and methods of selection of participants. Describe methods of follow-up                                            | 7                   |
|                                                                                                              |         | <i>Case-control study</i> —Give the eligibility criteria, and the sources and methods of case ascertainment and control selection. Give the rationale for the choice of cases and controls |                     |
|                                                                                                              |         | <i>Cross-sectional study</i> —Give the eligibility criteria, and the sources and methods of selection of participants                                                                      |                     |
| Variables                                                                                                    | 7       | (b) <i>Cohort study</i> —For matched studies, give matching criteria and number of exposed and unexposed                                                                                   | Not                 |
|                                                                                                              |         | <i>Case-control study</i> —For matched studies, give matching criteria and the number of controls per case                                                                                 | Applicable          |
|                                                                                                              |         | Clearly define all outcomes, exposures, predictors, potential confounders, and effect modifiers. Give diagnostic criteria, if applicable                                                   | 7,8                 |
| Data sources/measurement                                                                                     | 8*      | For each variable of interest, give sources of data and details of methods of assessment (measurement). Describe comparability of assessment methods if there is more than one group       | 7,8                 |
| Bias                                                                                                         | 9       | Describe any efforts to address potential sources of bias                                                                                                                                  | 7                   |
| Study size                                                                                                   | 10      | Explain how the study size was arrived at                                                                                                                                                  | 7                   |
| Quantitative variables                                                                                       | 11      | Explain how quantitative variables were handled in the analyses. If applicable, describe which groupings were chosen and why                                                               | 7                   |
| Statistical methods                                                                                          | 12      | (a) Describe all statistical methods, including those used to control for confounding                                                                                                      | 8                   |
|                                                                                                              |         | (b) Describe any methods used to examine subgroups and interactions                                                                                                                        | 8                   |
|                                                                                                              |         | (c) Explain how missing data were addressed                                                                                                                                                | 7                   |
|                                                                                                              |         | (d) <i>Cohort study</i> —If applicable, explain how loss to follow-up was addressed                                                                                                        | 8                   |
|                                                                                                              |         | <i>Case-control study</i> —If applicable, explain how matching of cases and controls was addressed                                                                                         |                     |
| <i>Cross-sectional study</i> —If applicable, describe analytical methods taking account of sampling strategy |         |                                                                                                                                                                                            |                     |
|                                                                                                              |         | (e) Describe any sensitivity analyses                                                                                                                                                      | 8                   |

| Section/Topic            | Item No | Recommendation                                                                                                                                                                                               | Reported on Page No |
|--------------------------|---------|--------------------------------------------------------------------------------------------------------------------------------------------------------------------------------------------------------------|---------------------|
| <b>Results</b>           |         |                                                                                                                                                                                                              |                     |
| Participants             | 13*     | (a) Report numbers of individuals at each stage of study—eg numbers potentially eligible, examined for eligibility, confirmed eligible, included in the study, completing follow-up, and analysed            | 7                   |
|                          |         | (b) Give reasons for non-participation at each stage                                                                                                                                                         | 7                   |
|                          |         | (c) Consider use of a flow diagram                                                                                                                                                                           | 7                   |
| Descriptive data         | 14*     | (a) Give characteristics of study participants (eg demographic, clinical, social) and information on exposures and potential confounders                                                                     | 8                   |
|                          |         | (b) Indicate number of participants with missing data for each variable of interest                                                                                                                          | 7                   |
|                          |         | (c) <i>Cohort study</i> —Summarise follow-up time (eg, average and total amount)                                                                                                                             | Not Applicable      |
| Outcome data             | 15*     | <i>Cohort study</i> —Report numbers of outcome events or summary measures over time                                                                                                                          | Not Applicable      |
|                          |         | <i>Case-control study</i> —Report numbers in each exposure category, or summary measures of exposure                                                                                                         | Not Applicable      |
|                          |         | <i>Cross-sectional study</i> —Report numbers of outcome events or summary measures                                                                                                                           | 8                   |
| Main results             | 16      | (a) Give unadjusted estimates and, if applicable, confounder-adjusted estimates and their precision (eg, 95% confidence interval). Make clear which confounders were adjusted for and why they were included | 9                   |
|                          |         | (b) Report category boundaries when continuous variables were categorized                                                                                                                                    | 9                   |
|                          |         | (c) If relevant, consider translating estimates of relative risk into absolute risk for a meaningful time period                                                                                             | Not Applicable      |
| Other analyses           | 17      | Report other analyses done—eg analyses of subgroups and interactions, and sensitivity analyses                                                                                                               | 9,10                |
| <b>Discussion</b>        |         |                                                                                                                                                                                                              |                     |
| Key results              | 18      | Summarise key results with reference to study objectives                                                                                                                                                     | 11                  |
| Limitations              | 19      | Discuss limitations of the study, taking into account sources of potential bias or imprecision. Discuss both direction and magnitude of any potential bias                                                   | 12                  |
| Interpretation           | 20      | Give a cautious overall interpretation of results considering objectives, limitations, multiplicity of analyses, results from similar studies, and other relevant evidence                                   | 11                  |
| Generalisability         | 21      | Discuss the generalisability (external validity) of the study results                                                                                                                                        | 12                  |
| <b>Other Information</b> |         |                                                                                                                                                                                                              |                     |

|   |         |    |                                                                                                                                                               |    |
|---|---------|----|---------------------------------------------------------------------------------------------------------------------------------------------------------------|----|
| 1 | Funding | 22 | Give the source of funding and the role of the funders for the present study and, if applicable, for the original study on which the present article is based | 13 |
|---|---------|----|---------------------------------------------------------------------------------------------------------------------------------------------------------------|----|

2

3 *\*Give information separately for cases and controls in case-control studies and, if applicable, for exposed and unexposed groups in cohort and cross-sectional studies.*

4 **Note:** An Explanation and Elaboration article discusses each checklist item and gives methodological background and published examples of transparent reporting. The STROBE checklist is best used in conjunction with this article (freely available on the Web sites of PLoS Medicine at <http://www.plosmedicine.org/>, Annals of Internal Medicine at <http://www.annals.org/>, and Epidemiology at <http://www.epidem.com/>). Information on the STROBE Initiative is available at [www.strobe-statement.org](http://www.strobe-statement.org).

5

6

7

8

9

10

11

12

13

14

15

16

17

18

19

20

21

22

23

24

25

26

27

28

29

30

31

32

33

34

35

36

37

38

39

40

41

42

43

44

45

46

47

For peer review only

# BMJ Open

## Prevalence of hyperuricemia in an eastern Chinese population: a cross-sectional study

|                                 |                                                                                                                                                                                                                                                                                                                                                                                                                                                                                                                                                                                                                                                                                                                                                                                 |
|---------------------------------|---------------------------------------------------------------------------------------------------------------------------------------------------------------------------------------------------------------------------------------------------------------------------------------------------------------------------------------------------------------------------------------------------------------------------------------------------------------------------------------------------------------------------------------------------------------------------------------------------------------------------------------------------------------------------------------------------------------------------------------------------------------------------------|
| Journal:                        | <i>BMJ Open</i>                                                                                                                                                                                                                                                                                                                                                                                                                                                                                                                                                                                                                                                                                                                                                                 |
| Manuscript ID                   | bmjopen-2019-035614.R3                                                                                                                                                                                                                                                                                                                                                                                                                                                                                                                                                                                                                                                                                                                                                          |
| Article Type:                   | Original research                                                                                                                                                                                                                                                                                                                                                                                                                                                                                                                                                                                                                                                                                                                                                               |
| Date Submitted by the Author:   | 19-Mar-2020                                                                                                                                                                                                                                                                                                                                                                                                                                                                                                                                                                                                                                                                                                                                                                     |
| Complete List of Authors:       | Han, Bing; Shanghai 9th Peoples Hospital Affiliated to Shanghai Jiaotong University School of Medicine<br>Wang, Ningjian; Shanghai 9th Peoples Hospital Affiliated to Shanghai Jiaotong University School of Medicine<br>Chen, Yi; Shanghai 9th Peoples Hospital Affiliated to Shanghai Jiaotong University School of Medicine<br>Li, Qin; Shanghai 9th Peoples Hospital Affiliated to Shanghai Jiaotong University School of Medicine<br>Zhu, Chunfang ; Shanghai 9th Peoples Hospital Affiliated to Shanghai Jiaotong University School of Medicine<br>Chen, Yingchao; Shanghai 9th Peoples Hospital Affiliated to Shanghai Jiaotong University School of Medicine<br>Lu, Yingli; Shanghai 9th Peoples Hospital Affiliated to Shanghai Jiaotong University School of Medicine |
| <b>Primary Subject Heading</b>: | Diabetes and endocrinology                                                                                                                                                                                                                                                                                                                                                                                                                                                                                                                                                                                                                                                                                                                                                      |
| Secondary Subject Heading:      | Epidemiology                                                                                                                                                                                                                                                                                                                                                                                                                                                                                                                                                                                                                                                                                                                                                                    |
| Keywords:                       | General endocrinology < DIABETES & ENDOCRINOLOGY, EPIDEMIOLOGY, Diabetes & endocrinology < INTERNAL MEDICINE                                                                                                                                                                                                                                                                                                                                                                                                                                                                                                                                                                                                                                                                    |
|                                 |                                                                                                                                                                                                                                                                                                                                                                                                                                                                                                                                                                                                                                                                                                                                                                                 |

SCHOLARONE™  
Manuscripts



I, the Submitting Author has the right to grant and does grant on behalf of all authors of the Work (as defined in the below author licence), an exclusive licence and/or a non-exclusive licence for contributions from authors who are: i) UK Crown employees; ii) where BMJ has agreed a CC-BY licence shall apply, and/or iii) in accordance with the terms applicable for US Federal Government officers or employees acting as part of their official duties; on a worldwide, perpetual, irrevocable, royalty-free basis to BMJ Publishing Group Ltd ("BMJ") its licensees and where the relevant Journal is co-owned by BMJ to the co-owners of the Journal, to publish the Work in this journal and any other BMJ products and to exploit all rights, as set out in our [licence](#).

The Submitting Author accepts and understands that any supply made under these terms is made by BMJ to the Submitting Author unless you are acting as an employee on behalf of your employer or a postgraduate student of an affiliated institution which is paying any applicable article publishing charge ("APC") for Open Access articles. Where the Submitting Author wishes to make the Work available on an Open Access basis (and intends to pay the relevant APC), the terms of reuse of such Open Access shall be governed by a Creative Commons licence – details of these licences and which [Creative Commons](#) licence will apply to this Work are set out in our licence referred to above.

Other than as permitted in any relevant BMJ Author's Self Archiving Policies, I confirm this Work has not been accepted for publication elsewhere, is not being considered for publication elsewhere and does not duplicate material already published. I confirm all authors consent to publication of this Work and authorise the granting of this licence.

1  
2  
3 **1 Prevalence of hyperuricemia in an eastern Chinese population: a cross-sectional**  
4 **2 study**  
5

6  
7 3 Bing Han\*, Ningjian Wang, Yi Chen, Qin Li, Chunfang Zhu, Yingchao Chen and Yingli Lu\*  
8

9  
10 4 Institute and Department of Endocrinology and Metabolism, Shanghai Ninth People's  
11  
12 5 Hospital Affiliated to Shanghai Jiaotong University School of Medicine, Shanghai, China  
13

14 6  
15  
16 7 Correspondance: Dr Yingli Lu, luyingli2008@126.com and Bing Han,  
17  
18 8 hanbing1423@163.com.  
19

20 9 Running title: Prevalence of hyperuricemia in China.  
21  
22  
23  
24  
25  
26  
27  
28  
29  
30  
31  
32  
33  
34  
35  
36  
37  
38  
39  
40  
41  
42  
43  
44  
45  
46  
47  
48  
49  
50  
51  
52  
53  
54  
55  
56  
57  
58  
59  
60

1  
2  
3  
4 10 **ABSTRACT**

5 11 **Objectives:** In the past decade, China has been characterized by large-scale urbanization as  
6  
7 12 well as rapid economic growth. The aim of this study was to further investigate the  
8  
9 13 prevalence of hyperuricemia (HUA) in an eastern Chinese population.

10  
11 14 **Design:** Cross-sectional study.

12  
13 15 **Setting:** Survey of Prevalence in East China of Metabolic Diseases and Risk Factors  
14  
15 16 (SPECT-China) study.

16  
17 17 **Participants:** In this study, 12,770 residents from 22 sites in eastern China were recruited.  
18  
19 18 Finally, 9,225 subjects were included.

20  
21 19 **Main outcome measures:** The serum levels of uric acid, fasting plasma glucose (FPG),  
22  
23 20 glycated hemoglobin (HbA1c) and other metabolic parameters were tested. Waist  
24  
25 21 circumference (WC), weight, height and blood pressure were also measured. Questionnaires  
26  
27 22 regarding smoking, drinking, education, etc., were collected from the subjects. HUA was  
28  
29 23 defined as serum UA >420  $\mu\text{mol/L}$  for men and >360  $\mu\text{mol/L}$  for women.

30  
31 24 **Results:** The prevalence of HUA in this eastern Chinese population was 11.3% (9.9, 12.7)  
32  
33 25 overall, 20.7% (17.7, 23.7) in men and 5.6% (4.3, 6.7) in women. The prevalence of HUA in  
34  
35 26 urban subjects was higher than that in rural subjects (12.9 vs. 10.8%,  $P<0.01$ ). The prevalence  
36  
37 27 of HUA was negatively and positively associated with age in men and women, respectively.  
38  
39 28 Residents with high body mass index (BMI) levels had a higher prevalence of HUA. In the  
40  
41 29 logistic regression analysis, male sex, urban residency, total cholesterol (TC), triglyceride  
42  
43 30 (TG), overweight, obesity, systolic blood pressure (SBP) and low economic status were  
44  
45 31 independently correlated with HUA.

46  
47 32 **Conclusions:** The estimated prevalence of HUA in this eastern Chinese population was  
48  
49 33 11.3% (9.9, 12.7) overall and 20.7% (17.7, 23.7) and 5.6% (4.3, 6.7) in men and women,  
50  
51 34 respectively. HUA has gradually become an important public health issue in China.

52  
53 35 **Trial registration:** ChiCTR-ECS-14005052.

54  
55 36 **Keywords:** Prevalence, hyperuricemia, economic growth, public health, risk factors  
56  
57  
58  
59  
60

1  
2  
3  
4 37 **Strengths and limitations of this study**

5 38 This is the largest published hyperuricemia study in an eastern Chinese population.

6  
7 39 This study covers residents from 22 sites in five provinces.

8  
9 40 This is a regional survey instead of a national study.

10  
11 41 We do not consider the influence of diet.  
12  
13  
14  
15  
16  
17  
18  
19  
20  
21  
22  
23  
24  
25  
26  
27  
28  
29  
30  
31  
32  
33  
34  
35  
36  
37  
38  
39  
40  
41  
42  
43  
44  
45  
46  
47  
48  
49  
50  
51  
52  
53  
54  
55  
56  
57  
58  
59  
60



1  
2  
3  
4 42 **Abbreviations:** HUA, hyperuricemia; FPG, fasting plasma glucose; WC; waist  
5  
6 43 circumference; BMI, body mass index; LDL, low-density lipoprotein; TG, triglyceride; HDL,  
7  
8 44 high-density lipoprotein; TC, total cholesterol; HbA1c, Glycated hemoglobin; SBP, systolic  
9  
10 45 blood pressure; DBP, diastolic blood pressure; NAFLD, Nonalcoholic fatty liver disease;  
11  
12 46 CKD, chronic kidney disease; NGT, Normal glucose tolerance; GDP, gross domestic product;  
13  
14 47 HPLC, high-performance liquid chromatography  
15  
16  
17  
18  
19  
20  
21  
22  
23  
24  
25  
26  
27  
28  
29  
30  
31  
32  
33  
34  
35  
36  
37  
38  
39  
40  
41  
42  
43  
44  
45  
46  
47  
48  
49  
50  
51  
52  
53  
54  
55  
56  
57  
58  
59  
60

## 48 **Introduction**

49 In humans, uric acid (UA) is the end product of purine metabolism and is mainly excreted via  
50 the kidneys. Xanthine oxidoreductase catalyzes two enzymatic reactions, hypoxanthine to  
51 xanthine and xanthine to UA. Several conditions can influence the concentration of serum UA,  
52 including purine-rich food intake, neoplastic disease, cytotoxic drugs, obesity, hypertension,  
53 etc. [1-3].

54 Uric acid is reported to be associated with oxidative stress and inflammation [1, 4]. In  
55 patients with hyperuricemia (HUA), deposition of UA in joints and tissues promotes the  
56 occurrence of gout and chronic nephropathy. HUA has also been reported to be associated  
57 with insulin resistance, nonalcoholic fatty liver disease (NAFLD) [5, 6], metabolic syndrome,  
58 type 2 diabetes, atherosclerosis and coronary heart disease [7-11]. The overall prevalence of  
59 HUA in adults in the United States was 21.4% in 2007-2008 [12]. In 2009-2010, Liu H et al  
60 showed the adjusted prevalence of HUA was 8.4% in Chinese adults [13]. Recently, Lu X et  
61 al conducted a nationwide survey in 31 provinces in China. The prevalence of HUA were  
62 13.7%-18.8% based on different urine iodine concentrations[14]. These studies were national  
63 cross-sectional surveys using multistage, stratified sampling. There were also several local or  
64 regional investigations. In Henan Rural Cohort Study conducted from 2015 to 2017, the crude  
65 and age-standardized prevalence of HUA were 10.24% and 12.60%, respectively[15]. In 2017,  
66 Chen Y et al found that the prevalence of HUA was 13.4% in Jidong community of Tangshan  
67 City in northern China[16]. In an elderly Chinese population of 7 areas, the overall prevalence  
68 of HUA was 13.1% in 2018 [17]. Liu R et al [18] also conducted a meta-analysis including 38  
69 regional studies between 2000 and 2014 to determine the prevalence of HUA in mainland  
70 China. The pooled prevalence of HUA was 13.3% (male 19.4% and female 7.9%).

71 In the past decade, China has been characterized by large-scale urbanization. The  
72 percentage of the urban population rose from 18% in 1978 to 56% in 2015 [19]. As serum UA  
73 is closely related to economic development and urbanization [15], it is necessary to  
74 understand the latest prevalence of HUA in China.

75 China is characterized by regional and economic diversity. Eastern China has a relatively  
76 higher economic status than the rest of the country. In the present study, we performed a  
77 cross-sectional survey to investigate the prevalence of HUA and its risk factors in an eastern

1  
2  
3  
4  
5  
6  
7  
8  
9  
10  
11  
12  
13  
14  
15  
16  
17  
18  
19  
20  
21  
22  
23  
24  
25  
26  
27  
28  
29  
30  
31  
32  
33  
34  
35  
36  
37  
38  
39  
40  
41  
42  
43  
44  
45  
46  
47  
48  
49  
50  
51  
52  
53  
54  
55  
56  
57  
58  
59  
60

78 Chinese population.

## 79 **Methods**

### 80 **Study population**

81 Data from the current study are from the Survey of Prevalence in East China of Metabolic  
82 Diseases and Risk Factors (SPECT-China), which is a population-based cross-sectional  
83 survey of the prevalence of metabolic diseases and risk factors in eastern China [20]. The  
84 registration number is ChiCTR-ECS-14005052 ([www.chictr.org](http://www.chictr.org)). 12,770 residents from 22  
85 sites in five provinces (Shanghai, Zhejiang, Jiangsu, Anhui and Jiangxi) were recruited from  
86 January 2014 to December 2015 (Supplemental Figure 1). The inclusion and exclusion  
87 criteria were described previously [20]. Local residents more than 18 years old and lived in  
88 their current area for more than 6 months were included in this study. We excluded subjects  
89 with severe communication problems, acute illness, or an unwillingness to participate. We  
90 also excluded residents who had no UA data (n=3,535) and chronic kidney disease (CKD)  
91 stage 5 (n=10). Finally, 9,225 subjects were included. This study was approved by the ethics  
92 committee of the Shanghai Ninth People's Hospital affiliated with Shanghai Jiaotong  
93 University School of Medicine. Informed consent was obtained from all the participants.

### 95 **Measurements and definition**

96 HUA was defined as serum UA >420  $\mu\text{mol/L}$  for men and >360  $\mu\text{mol/L}$  for women [21].  
97 Blood pressure and heart rate were measured with a sphygmomanometer  
98 (TERUMO-Elemano) three times. Mean value of the three records was used in the analysis.  
99 Hypertension was defined as a systolic blood pressure (SBP)  $\geq 140$  mmHg or diastolic blood  
100 pressure (DBP)  $\geq 90$  mmHg or any self-reported history of hypertension. Diabetes was  
101 defined as a self-reported history of diabetes or glycated hemoglobin (HbA1c) levels of 6.5%  
102 or more. Prediabetes was defined as HbA1c concentrations between 5.7% and 6.4%. Normal  
103 glucose tolerance (NGT) was defined as an HbA1c less than 5.7% [22]. Weight, height and  
104 waist circumference (WC) were measured by standard procedure. Body mass index (BMI)  
105 was calculated as weight (kg) divided by height squared ( $\text{m}^2$ ). Overweight and obesity were  
106 defined as  $24 \text{ kg/m}^2 \leq \text{BMI} < 28 \text{ kg/m}^2$  and  $\text{BMI} \geq 28 \text{ kg/m}^2$ , respectively. Demographic  
107 characteristics and lifestyle risk factors were collected by standard questionnaires. Current  
108 smoking, drinking and economic status were defined as previously described [23,24].

1  
2  
3  
4 1095 110 **Assessment of biochemical indexes**

7 111 After fasting for 8 hours, venous blood samples were drawn from all participants and quickly  
8 112 centrifuged at room temperature. Within 2-4 hours of collection, blood samples were stored at  
9 113 -20°C and transported by air in dry ice to one central laboratory certified by the College of  
10 114 American Pathologists as previously described [25]. Serum UA was analyzed with a  
11 115 Beckman Coulter AU 680 device with the original kit (Brea, California, USA). The validity  
12 116 and accuracy of UA were 6% and 4%, respectively. Other biochemical indexes were analyzed  
13 117 as described previously [26].  
14  
15  
16  
17  
18  
19  
20  
21  
22

23 118

24 119 **Statistical analysis**

25 120 We performed statistical analysis by IBM SPSS Version 22 (IBM Corporation, Armonk, New  
26 121 York). Demographic and metabolic characteristics are expressed as the mean  $\pm$  SD for  
27 122 continuous variables and percentages (95% CI) for categorical variables in the overall  
28 123 population and in subgroups of location, age, economic status, BMI and glucose status.  
29 124 Logistic analysis was used to investigate the association of demographic, lifestyle, and  
30 125 metabolic factors with the odds of HUA. According to the 6th national population census data,  
31 126 the proportions of the population in different age groups (<40, 40-60,  $\geq$ 60) are 57.39%,  
32 127 29.29%, and 13.31% (total); 58.10%, 29.13%, and 12.76% (male); and 56.61%, 29.46%, and  
33 128 13.91% (female), respectively [27]. Thus, we adjusted the prevalence of HUA by these  
34 129 proportions. All analyses were two-sided.  $P < 0.05$  was considered significant.  
35  
36  
37  
38  
39  
40  
41  
42  
43  
44  
45

46 130

47 131 **Patient and public involvement**

48 132 Patients and the public were not involved in the development of research questions, design of  
49 133 the study, recruitment and conduct of the study or dissemination of the study results.  
50  
51  
52  
53  
54  
55  
56  
57  
58  
59  
60

## 134 **Results**

### 135 **Characteristics of this eastern Chinese population**

136 In our study, we analyzed UA in 9,225 Chinese adults, including 3,682 males (age,  
137 55.57±13.23 y) and 5,543 females (age 54.30±12.82 y). The mean levels of serum UA were  
138 352.12±79.30 nmol/L and 269.29±64.68 nmol/L in males and females, respectively. There  
139 were significant sex differences in blood glucose, blood lipids, UA, BMI, WC and blood  
140 pressure. The prevalence of diabetes and hypertension also showed a significant difference  
141 (Table 1).

### 143 **Metabolic risk factors of this eastern Chinese population**

144 The prevalence of diabetes and hypertension, WC, SBP and BMI increased with age. As BMI  
145 and glucose levels rose, the prevalence of hypertension, WC, SBP, BMI, triglyceride (TG),  
146 FPG, and HbA1c increased. Moreover, people living in rural areas had a higher prevalence of  
147 diabetes, WC, SBP, low-density lipoprotein (LDL), high-density lipoprotein (HDL), total  
148 cholesterol (TC) and HbA1c. People with a high economic status had a higher prevalence of  
149 diabetes, WC, UA, BMI, LDL, FPG, HbA1c and Cr (Tables 2, 3).

### 151 **Estimated prevalence of HUA in this eastern Chinese population**

152 The prevalence of HUA was 12.3% (11.6, 12.9), with 17.9% (16.7, 19.1) and 8.5% (7.8, 9.3)  
153 in males and females, respectively. The prevalence of HUA in urban areas was higher than  
154 that in rural areas (12.9% vs. 10.8%). The prevalence of HUA in developed areas was slightly  
155 higher than that in underdeveloped areas (12.6% vs. 11.8%). As BMI increased, the  
156 prevalence of HUA increased in both men and women. The prevalence of HUA in normal,  
157 prediabetic and diabetic women were 5.7% (4.9, 6.5), 11.6% (10.0, 13.2) and 15.2% (12.5,  
158 17.9) respectively (Table 4). So there was an increased trend of prevalence of HUA in women  
159 with different glucose status. However, this trend was not obvious in men. After adjusting for  
160 the proportions of the population in different age groups, the prevalence of HUA was 11.3%  
161 (9.9, 12.7), with 20.7% (17.7, 23.7) and 5.6% (4.3, 6.7) in males and females, respectively  
162 (Table 4). When HUA was defined as serum UA of more than 420 µmol/L in both men and  
163 women, the prevalence of HUA was 8.4% (7.8, 9.0) in total and 2.1% (1.7, 2.5) in females.

1  
2  
3  
4 164 After adjusting for the proportions of the population in different age groups, the prevalence of  
5 165 HUA was 8.8% (7.5, 10.1) in total and 1.4% (0.7, 2.0) in females (Supplemental Table 1).

6  
7 166

8  
9 167 **Logistic regression analysis of HUA**

10  
11 168 Male sex, urban residency, increased TC or TG, overweight, obesity, elevated SBP and low  
12 169 economic status were all risk factors for HUA in this eastern Chinese population (Table 5).

13  
14 170 However, increased age, higher educational status, increased LDL or HDL, current smoking  
15 171 or drinking and elevated DBP were not associated with the risk of HUA. When HUA was  
16 172 defined as serum UA of more than 420  $\mu\text{mol/L}$  in both men and women, the association was  
17 173 similar to the above results (Supplemental Table 2).

18  
19  
20  
21  
22  
23  
24  
25  
26  
27  
28  
29  
30  
31  
32  
33  
34  
35  
36  
37  
38  
39  
40  
41  
42  
43  
44  
45  
46  
47  
48  
49  
50  
51  
52  
53  
54  
55  
56  
57  
58  
59  
60

## 174 Discussion

175 In this eastern Chinese population, the prevalence of HUA was 11.3%, which was similar to  
176 the pooled prevalence reported in a systematic review performed in China (13.3%) [18].  
177 However, this prevalence was more than that in the national HUA survey, which reported that  
178 the prevalence of HUA was 8.4% in 2009-2010 [13]. These two studies investigated different  
179 populations. Recently, a national study was performed on the relationship between  
180 hyperuricemia and iodine intake. The prevalence of hyperuricemia was 17.8%, 18.8%, 16.0%  
181 and 13.7% in the urinary iodine concentrations (UICs) <100, 100-199, 200-299, and  
182  $\geq 300$ ug/L groups [14]. Our result was between these national surveys, which was performed  
183 in 2014-2015. As a regional study, the prevalence of our result was similar to other regional  
184 investigations in China[15-18]. However, our prevalence was relatively lower than that in  
185 Qingdao, Shandong Province, which is close to the sea and where residents consume high  
186 amounts of seafood and beer [28]. Moreover, the prevalence of HUA in our population was  
187 lower than those in the United States and Japan [12, 29], which might be attributed to  
188 economic status.

189 The prevalence of HUA in young men (<40 years) was seven times greater than that in  
190 young women. However, as age increased, the prevalence of HUA gradually decreased in  
191 men and increased in women, which was coincident with values previously reported [30]. In  
192 residents more than 60 years of age, men and women had a similar prevalence of HUA. We  
193 deduced that the diet of young men contains more purine than that of old men. The young  
194 men also had an active metabolism. The prevalence of HUA was dramatically increased in  
195 women older than 60 years, which might be caused by reduced estrogen levels.

196 Risk factors for HUA were also evaluated in our study. We found that male sex, urban  
197 residency, hypertriglyceridemia, hypercholesterolemia, overweight, obesity, high SBP and  
198 low economic status were risk factors for HUA. In previous studies, hypertriglyceridemia was  
199 thought to be the strongest risk factor for HUA [30, 31]. However, the OR for HUA was 1.7  
200 times with 1 SD elevation of triglyceridemia. In addition, obesity was the strongest risk factor  
201 (OR=2.874) in our study. China has the largest obese population in the world [32]. In this  
202 case, the prevalence of HUA will increase with the rising trend of obesity. Therefore, we  
203 should pay more attention to prevent its consequences.



1  
2  
3  
4 204 HUA is closely related to lifestyle and dietary habits. In previous studies, the prevalence of  
5  
6 205 HUA in urban areas was much greater than that in rural areas [13, 30]. In our study, the  
7  
8 206 prevalence of HUA in urban areas was mildly elevated (12.9% vs. 10.8%), and urbanization  
9  
10 207 was a risk factor for HUA. Eastern China is considered the developed area in the whole  
11  
12 208 country. Therefore, the difference between urban and rural areas was not obvious as in other  
13  
14 209 places. Moreover, people with high economic status consumed more healthy food that  
15  
16 210 contained low purine ingredients. This could partly explain why low economic status became  
17  
18 211 a risk factor for HUA. In accordance with a previous study, smoking was not associated with  
19  
20 212 HUA [13]. However, according to a previous study, alcohol intake influences serum UA,  
21  
22 213 which is different from the results of our study. This difference might have been caused by  
23  
24 214 our definition of current drinking (current drinking was defined as drinking in the past 1  
25  
26 215 month), which mixed nonhabitual drinkers and habitual drinkers together.

27 216 As age increased, UA together with components of metabolic syndrome (FPG, SBP, WC)  
28  
29 217 also increased, which indicated that there might be a close relationship between metabolic  
30  
31 218 syndrome and HUA. Other studies have also found that HUA is associated with metabolic  
32  
33 219 syndrome [33, 34]. An epidemiologic study showed that HUA is positively correlated with  
34  
35 220 fasting serum insulin [35]. Krishnan et al reported that people with HUA have 1.36 times the  
36  
37 221 risk of developing insulin resistance in a 15-year follow-up study [36]. Thus, research has  
38  
39 222 indicated that insulin resistance plays an important role in the relationship between metabolic  
40  
41 223 syndrome and HUA [37].

42 224 There were several limitations in our study. First, this was not a national study but a local  
43  
44 225 survey. Second, we did not consider the influence of diet. Blood was drawn after fasting for  
45  
46 226 eight hours. However, the diet ingested near the blood drawing time was unknown. In  
47  
48 227 addition, this was a cross-sectional study. Therefore, we could not identify a causal  
49  
50 228 relationship between HUA and its risk factors.

51  
52 229 In this study, we estimated the prevalence of HUA in an eastern Chinese population. To  
53  
54 230 prevent the prevalence of HUA, more attention should be paid to life status (such as economic  
55  
56 231 status and residence) and metabolic indexes (TC, TG, BMI, and SBP).  
57  
58  
59  
60

1  
2  
3  
4 232 **Acknowledgments**

5 233 We thank all the participants in the study.

7 234 **Contributors**

9 235 YL and BH designed and supervised this investigation. BH performed this investigation. YC,  
11 236 CFZ and YCC contributed to the data collection. NJW and QL provided technical or material  
13 237 support. All authors read and approved the final manuscript.

15 238 **Funding**

17 239 This study was supported by National Natural Science Foundation of China (91857117,  
19 240 81670717); Science and Technology Commission of Shanghai Municipality (19140902400,  
21 241 18410722300); the Major Science and Technology Innovation Program of Shanghai  
23 242 Municipal Education Commission (2019-01-07-00-01-E00059); Commission of Health and  
25 243 Family Planning of Pudong District (PWZxq2017-17); Municipal Human Resources  
27 244 Development Program for Outstanding Young Talents in Medical and Health Sciences in  
29 245 Shanghai (2017YQ053); Shanghai JiaoTong University School of Medicine (19XJ11007).

31 246 The funders played no role in the design or conduct of the study, collection, management,  
33 247 analysis, or interpretation of data or in the preparation, review, or approval of the article.

35 248 **Competing interests**

37 249 The authors have declared that no competing interests exist.

39 250 **Patient consent for publication**

41 251 Not required

43 252 **Ethical approval**

45 253 The study protocol was approved by the Institutional Review Board of the Shanghai Ninth  
47 254 People's Hospital affiliated with Shanghai Jiaotong University School of Medicine.

49 255 **Provenance and peer review**

51 256 Not commissioned; externally peer reviewed.

53 257 **Data availability statement**

55 258 Data are available upon request to corresponding author.  
56  
57  
58  
59  
60

259 **References**

- 260 1. Strazzullo P, Puig JG. Uric acid and oxidative stress: relative impact on cardiovascular  
261 risk? *Nutr Metab Cardiovasc Dis*. 2007;17:409-14.
- 262 2. Strazzullo P, Barba G, Cappuccio FP, et al. Altered renal sodium handling in men with  
263 abdominal adiposity: a link to hypertension. *J Hypertens*. 2001;19:2157-64.
- 264 3. Strazzullo P, Barbato A, Galletti F, et al. Abnormalities of renal sodium handling in the  
265 metabolic syndrome. Results of the Olivetti Heart Study. *J Hypertens*. 2006;24:1633-9.
- 266 4. Kanellis J, Kang DH. Uric acid as a mediator of endothelial dysfunction, inflammation,  
267 and vascular disease. *Semin Nephrol*. 2005;25:39-42.
- 268 5. Xu C, Yu C, Xu L, et al. High serum uric acid increases the risk for nonalcoholic Fatty  
269 liver disease: a prospective observational study. *PLoS One*. 2010;5:e11578.
- 270 6. Ryu S, Chang Y, Kim SG, et al. Serum uric acid levels predict incident nonalcoholic  
271 fatty liver disease in healthy Korean men. *Metabolism*. 2011;60:860-866.
- 272 7. Gustafsson D, Unwin R. The pathophysiology of hyperuricaemia and its possible  
273 relationship to cardiovascular disease, morbidity and mortality. *BMC Nephrol*.  
274 2013;14:164.
- 275 8. Katsiki N, Karagiannis A, Athyros VG, et al. Hyperuricaemia: more than just a cause of  
276 gout? *J Cardiovasc Med (Hagerstown)*. 2013;14:397-402.
- 277 9. Choi HK, Curhan G. Independent impact of gout on mortality and risk for coronary heart  
278 disease. *Circulation*. 2007;116:894-900.
- 279 10. Choi HK, Ford ES. Prevalence of the metabolic syndrome in individuals with  
280 hyperuricemia. *Am J Med*. 2007;120:442-7.
- 281 11. Kim SY, Guevara JP, Kim KM, et al. Hyperuricemia and coronary heart disease: a  
282 systematic review and meta-analysis. *Arthritis Care Res (Hoboken)*. 2010;62:170-80.
- 283 12. Zhu Y, Pandya BJ, Choi HK. Prevalence of gout and hyperuricemia in the US general  
284 population: the National Health and Nutrition Examination Survey 2007-2008. *Arthritis  
285 Rheum*. 2011;63:3136-41.
- 286 13. Liu H, Zhang XM, Wang YL, et al. Prevalence of hyperuricemia among Chinese adults:  
287 a national cross-sectional survey using multistage, stratified sampling. *J Nephrol*.  
288 2014;27:653-8.

- 1  
2  
3  
4 289 14. Lu X, Shi X, Li Y, et al. A negative association between urinary iodine concentration  
5 and the prevalence of hyperuricemia and gout: a cross-sectional and population-based  
6 290 study in Mainland China. *Eur J Nutr*. 2020 Feb 20.  
7 291  
8  
9 292 15. Dong X, Zhang H, Wang F, et al. Epidemiology and prevalence of hyperuricemia among  
10 men and women in Chinese rural population: The Henan Rural Cohort Study. *Mod*  
11 293 *Rheumatol*. 2019;1-11.  
12 294  
13 295 16. Chen Y, Xia Y, Han X, et al. Association between serum uric acid and atrial fibrillation:  
14 a cross-sectional community-based study in China. *BMJ Open*. 2017;7:e019037.  
15 296  
16 297 17. Wang R, Tang Z, Sun F, Diao LJ. Prevalence of hyperuricemia in the elderly in 7 areas  
17 of China. *Zhonghua Liu Xing Bing Xue Za Zhi*. 2018;39:286-8.  
18 298  
19 299 18. Liu R, Han C, Wu D, et al. Prevalence of Hyperuricemia and Gout in Mainland China  
20 from 2000 to 2014: A Systematic Review and Meta-Analysis. *Biomed Res Int*.  
21 300 2015;2015:762820.  
22 301  
23 302 19. China National Bureau of Statistics, 2016. Statistical Communiqué of China on  
24 2015 National Economic and Social Development. Retrieved from:  
25 303 [http://www.stats.gov.cn/tjsj/zxfb/201602/t20160229\\_1323991.html](http://www.stats.gov.cn/tjsj/zxfb/201602/t20160229_1323991.html) .  
26 304  
27 305 20. Wang N, Shao H, Chen Y, et al. Follicle-Stimulating Hormone, Its Association with  
28 306 Cardiometabolic Risk Factors, and 10-Year Risk of Cardiovascular Disease in  
29 307 Postmenopausal Women. *J Am Heart Assoc*. 2017;6. pii: e005918.  
30 308  
31 309 21. Cai Z, Xu X, Wu X, et al. Hyperuricemia and the metabolic syndrome in Hangzhou. *Asia*  
32 *Pac J Clin Nutr*. 2009;18:81-7.  
33 310  
34 311 22. American Diabetes Association. Diagnosis and classification of diabetes mellitus.  
35 312 *Diabetes Care*. 2010; 33: S62–S69.  
36 313  
37 314 23. Xu Y, Wang L, He J, et al. Prevalence and control of diabetes in Chinese adults. *JAMA*.  
38 315 2013;310:948-59.  
39 316  
40 317 24. Wang N, Kuang L, Han B, et al. Follicle-stimulating hormone associates with  
41 318 prediabetes and diabetes in postmenopausal women. *Acta Diabetol*. 2016;53:227-36.  
42 319  
43 320 25. Chen Y, Cheng J, Chen Y et al. Association between serum vitamin D and uric acid in  
44 321 the eastern Chinese population: a population-based cross-sectional study. *BMC Endocr*  
45 322 *Disord* (In press)  
46 323  
47 324  
48 325  
49 326  
50 327  
51 328  
52 329  
53 330  
54 331  
55 332  
56 333  
57 334  
58 335  
59 336  
60 337

1  
2  
3  
4  
5  
6  
7  
8  
9  
10  
11  
12  
13  
14  
15  
16  
17  
18  
19  
20  
21  
22  
23  
24  
25  
26  
27  
28  
29  
30  
31  
32  
33  
34  
35  
36  
37  
38  
39  
40  
41  
42  
43  
44  
45  
46  
47  
48  
49  
50  
51  
52  
53  
54  
55  
56  
57  
58  
59  
60

- 319 26. Han B, Wang X, Wang N, et al. Investigation of vitamin D status and its correlation with  
320 insulin resistance in a Chinese population. *Public Health Nutr.* 2017;20:1602-8.
- 321 27. Tabulation on the 2010 Population Census of the People's Republic of China.[Internet]  
322 Available: <http://www.stats.gov.cn/tjsj/pcsj/rkpc/6rp/indexce.htm>
- 323 28. Dong Y, Nan H, Gao W. Prevalence of the metabolic syndrome among adults aged  
324 20–74 years in Zhanshan community of Qingdao. *Chinese Journal of Diabetes.*  
325 2004;12:177-81.
- 326 29. Nagahama K, Iseki K, Inoue T, et al. Hyperuricemia and cardiovascular risk factor  
327 clustering in a screened cohort in Okinawa, Japan. *Hypertens Res.* 2004;27(4):227-33.
- 328 30. Yang J, Liu Z, Zhang C, et al. The prevalence of hyperuricemia and its correlates in an  
329 inland Chinese adult population, urban and rural of Jinan. *Rheumatol Int.*  
330 2013;33:1511-7.
- 331 31. Miao Z, Li C, Chen Y, et al. Dietary and lifestyle changes associated with high  
332 prevalence of hyperuricemia and gout in the Shandong coastal cities of Eastern China. *J*  
333 *Rheumatol.* 2008;35:1859-64.
- 334 32. NCD Risk Factor Collaboration (NCD-RisC). Trends in adult body-mass index in 200  
335 countries from 1975 to 2014: a pooled analysis of 1698 population-based measurement  
336 studies with 19·2 million participants. *Lancet.* 2016;387:1377-96.
- 337 33. Lim JH, Kim YK, Kim YS, et al. Relationship between serum uric Acid levels,  
338 metabolic syndrome, and arterial stiffness in korean. *Korean Circ J.* 2010;40:314-20.
- 339 34. Lin SD, Tsai DH, Hsu SR. Association between serum uric acid level and components of  
340 the metabolic syndrome. *J Chin Med Assoc.* 2006;69:512-6.
- 341 35. Yoo TW, Sung KC, Shin HS, et al. Relationship between serum uric acid concentration  
342 and insulin resistance and metabolic syndrome. *Circ J.* 2005;69:928-33.
- 343 36. Krishnan E, Pandya BJ, Chung L, et al. Hyperuricemia in young adults and risk of  
344 insulin resistance, prediabetes, and diabetes: a 15-year follow-up study. *Am J Epidemiol.*  
345 2012;176:108-16.
- 346 37. Li C, Hsieh MC, Chang SJ. Metabolic syndrome, diabetes, and hyperuricemia. *Curr Opin*  
347 *Rheumatol.* 2013;25:210-6.

1  
2  
3  
4 348 **Figure legend**

5 349 **Supplemental Figure 1** Position of the 5 provinces and 22 sites in China.

6  
7 350 Residents from 22 sites in Shanghai, Zhejiang, Jiangsu, Anhui and Jiangxi provinces were

8  
9 351 enrolled in SPECT-China study.  
10  
11  
12  
13  
14  
15  
16  
17  
18  
19  
20  
21  
22  
23  
24  
25  
26  
27  
28  
29  
30  
31  
32  
33  
34  
35  
36  
37  
38  
39  
40  
41  
42  
43  
44  
45  
46  
47  
48  
49  
50  
51  
52  
53  
54  
55  
56  
57  
58  
59  
60

1  
2  
3  
4  
5  
6  
7  
8  
9  
10  
11  
12  
13  
14  
15  
16  
17  
18  
19  
20  
21  
22  
23  
24  
25  
26  
27  
28  
29  
30  
31  
32  
33  
34  
35  
36  
37  
38  
39  
40  
41  
42  
43  
44  
45  
46  
47  
48  
49  
50  
51  
52  
53  
54  
55  
56  
57  
58  
59  
60

352 **Table 1** Baseline characteristics between different groups.

| Variables             | Men (n=3682) | Women (n=5543) | P value |
|-----------------------|--------------|----------------|---------|
| Age y                 | 55.57±13.23  | 54.30±12.82    | <0.001  |
| FPG mmol/L            | 5.72±1.63    | 5.50±1.36      | <0.001  |
| HbA1c %               | 5.78±1.08    | 5.64±0.92      | <0.001  |
| TG mmol/L             | 1.88±1.79    | 1.55±1.20      | <0.001  |
| TC mmol/L             | 5.14±1.13    | 5.27±1.15      | <0.001  |
| LDL mmol/L            | 3.23±0.77    | 3.30±0.83      | <0.001  |
| HDL mmol/L            | 1.30±0.31    | 1.45±0.32      | <0.001  |
| UA umol/L             | 352.1±79.3   | 269.3±64.7     | <0.001  |
| BMI kg/m <sup>2</sup> | 25.11±3.45   | 24.40±3.67     | <0.001  |
| WC cm                 | 85.85±9.42   | 78.72±9.90     | <0.001  |
| SBP mmHg              | 134.3±20.7   | 131.1±22.2     | <0.001  |
| DBP mmHg              | 82.1±12.9    | 77.8±12.9      | <0.001  |
| Diabetes %            | 16.3%        | 12.7%          | <0.001  |
| Hypertension %        | 53.4%        | 44.1%          | <0.001  |

353 Uric acid: UA; Fasting plasma glucose: FPG; Alanine aminotransferase: ALT; Triglycerides: TG;

354 Total cholesterol: TC; Body mass index: BMI; Waist circumference: WC; Systolic blood pressure:

355 SBP; Diastolic blood pressure: DBP

**Table 2** Characteristics of Eastern Chinese population.

|                 | Percentage % (95%CI) |                   |                   |                   | Means $\pm$ SD    |                  |                  |
|-----------------|----------------------|-------------------|-------------------|-------------------|-------------------|------------------|------------------|
|                 | Diabetes             | Hypertension      | Smoking           | Drinking          | WC                | SBP              | BMI              |
| Overall         | 14.1 (13.4, 14.8)    | 47.8 (46.8, 48.9) | 19.2 (18.3, 20.0) | 55.8 (54.8, 56.9) | 81.57 $\pm$ 10.32 | 132.4 $\pm$ 21.7 | 24.68 $\pm$ 3.60 |
| Location        |                      |                   |                   |                   |                   |                  |                  |
| Rural           | 15.8 (14.4, 17.2)    | 58.7 (56.8, 60.6) | 22.9 (21.3, 24.5) | 56.6 (54.7, 58.5) | 83.14 $\pm$ 10.38 | 139.7 $\pm$ 23.2 | 24.71 $\pm$ 3.65 |
| Urban           | 13.4 (12.6, 14.2)    | 43.3 (42.1, 44.5) | 17.6 (16.7, 18.6) | 55.5 (54.3, 56.7) | 80.90 $\pm$ 10.23 | 129.4 $\pm$ 20.3 | 24.67 $\pm$ 3.58 |
| Age groups      |                      |                   |                   |                   |                   |                  |                  |
| <40             | 1.6 (0.9, 2.3)       | 11.1 (9.4, 12.9)  | 12.9 (11.0, 14.8) | 42.0 (39.2, 44.7) | 75.22 $\pm$ 10.55 | 116.8 $\pm$ 15.0 | 23.38 $\pm$ 3.61 |
| 40-60           | 11.3 (10.3, 12.2)    | 41.8 (40.3, 43.3) | 20.8 (19.6, 22.0) | 54.9 (53.4, 56.5) | 80.78 $\pm$ 9.87  | 129.5 $\pm$ 20.1 | 24.82 $\pm$ 3.35 |
| $\geq$ 60       | 21.5 (20.2, 22.9)    | 67.1 (65.6, 68.7) | 19.4 (18.1, 20.7) | 61.5 (59.9, 63.1) | 84.60 $\pm$ 9.59  | 141.0 $\pm$ 21.5 | 24.96 $\pm$ 3.79 |
| Economic status |                      |                   |                   |                   |                   |                  |                  |
| low             | 12.3 (11.3, 13.3)    | 47.8 (46.3, 49.4) | 21.2 (19.9, 22.5) | 46.6 (45.1, 48.2) | 81.07 $\pm$ 10.57 | 134.2 $\pm$ 23.5 | 24.50 $\pm$ 3.55 |
| high            | 15.6 (14.6, 16.6)    | 47.8 (46.4, 49.2) | 17.6 (16.5, 18.6) | 62.9 (61.6, 64.3) | 81.96 $\pm$ 10.10 | 131.0 $\pm$ 20.1 | 24.83 $\pm$ 3.64 |
| BMI             |                      |                   |                   |                   |                   |                  |                  |
| <24             | 9.8 (8.9, 10.7)      | 35.2 (33.7, 36.7) | 16.6 (15.4, 17.7) | 52.9 (51.3, 54.5) | 74.72 $\pm$ 7.85  | 126.9 $\pm$ 21.1 | 21.67 $\pm$ 1.69 |
| 24-28           | 15.2 (14.0, 16.4)    | 53.0 (51.4, 54.7) | 20.6 (19.2, 21.9) | 58.3 (56.7, 59.9) | 84.57 $\pm$ 7.30  | 135.2 $\pm$ 21.2 | 25.79 $\pm$ 1.12 |
| $\geq$ 28       | 24.1 (21.8, 26.3)    | 69.1 (66.7, 71.5) | 22.8 (20.6, 25.0) | 57.6 (55.0, 60.2) | 93.34 $\pm$ 8.52  | 140.5 $\pm$ 20.2 | 30.40 $\pm$ 3.09 |
| Glucose status  |                      |                   |                   |                   |                   |                  |                  |
| normal          | -                    | 37.0 (35.6, 38.3) | 16.2 (15.1, 17.2) | 50.6 (49.3, 52.0) | 78.95 $\pm$ 9.88  | 128.0 $\pm$ 20.6 | 24.08 $\pm$ 3.44 |
| prediabetes     | -                    | 57.6 (55.7, 59.5) | 23.4 (21.7, 25.0) | 63.2 (61.3, 65.1) | 83.90 $\pm$ 9.53  | 136.7 $\pm$ 21.6 | 25.26 $\pm$ 3.55 |
| diabetes        | -                    | 72.7 (70.3, 75.2) | 23.0 (20.6, 25.3) | 61.3 (58.7, 64.0) | 87.60 $\pm$ 9.97  | 141.9 $\pm$ 21.2 | 26.00 $\pm$ 3.78 |



1  
2  
3  
4  
5  
6  
7  
8  
9  
10  
11  
12  
13  
14  
15  
16  
17  
18  
19  
20  
21  
22  
23  
24  
25  
26  
27  
28  
29  
30  
31  
32  
33  
34  
35  
36  
37  
38  
39  
40  
41  
42  
43  
44  
45  
46

Body mass index: BMI; Waist circumference: WC; Systolic blood pressure: SBP

**Table 3** Biochemical index of Eastern Chinese population.

|                 | Means $\pm$ SD    |                  |                 |                  |                 |                  |                  |                    |
|-----------------|-------------------|------------------|-----------------|------------------|-----------------|------------------|------------------|--------------------|
|                 | UA                | LDL              | TG              | HDL              | TC              | FPG              | HbA1c            | Creatinine         |
| Overall         | 302.0 $\pm$ 81.5  | 3.28 $\pm$ 0.81  | 1.68 $\pm$ 1.48 | 1.39 $\pm$ 0.32  | 5.22 $\pm$ 1.14 | 5.58 $\pm$ 1.48  | 5.70 $\pm$ 0.99  | 77.31 $\pm$ 14.96  |
| Location        |                   |                  |                 |                  |                 |                  |                  |                    |
| Rural           | 294.8 $\pm$ 83.0  | 3.38 $\pm$ 0.83  | 1.69 $\pm$ 1.56 | 1.44 $\pm$ 0.31  | 5.37 $\pm$ 1.07 | 5.63 $\pm$ 1.60  | 5.80 $\pm$ 1.03  | 73.76 $\pm$ 14.20  |
| Urban           | 305.6 $\pm$ 80.9  | 3.23 $\pm$ 0.80  | 1.67 $\pm$ 1.43 | 1.37 $\pm$ 0.33  | 5.16 $\pm$ 1.17 | 5.57 $\pm$ 1.42  | 5.65 $\pm$ 0.96  | 78.87 $\pm$ 15.13  |
| Age groups      |                   |                  |                 |                  |                 |                  |                  |                    |
| <40             | 294.1 $\pm$ 85.7  | 2.81 $\pm$ 0.65  | 1.35 $\pm$ 1.25 | 1.39 $\pm$ 0.30  | 4.60 $\pm$ 0.87 | 4.98 $\pm$ 0.76  | 5.09 $\pm$ 0.57  | 75.82 $\pm$ 14.73  |
| 40-60           | 298.0 $\pm$ 82.8  | 3.29 $\pm$ 0.78  | 1.76 $\pm$ 1.71 | 1.39 $\pm$ 0.32  | 5.24 $\pm$ 1.16 | 5.52 $\pm$ 1.46  | 5.62 $\pm$ 0.94  | 76.26 $\pm$ 14.59  |
| $\geq$ 60       | 310.1 $\pm$ 78.3  | 3.42 $\pm$ 0.83  | 1.69 $\pm$ 1.20 | 1.38 $\pm$ 0.34  | 5.39 $\pm$ 1.13 | 5.86 $\pm$ 1.60  | 5.98 $\pm$ 1.04  | 79.09 $\pm$ 15.47  |
| Economic status |                   |                  |                 |                  |                 |                  |                  |                    |
| low             | 299.8 $\pm$ 85.1  | 3.23 $\pm$ 0.82  | 1.70 $\pm$ 1.65 | 1.45 $\pm$ 0.32  | 5.20 $\pm$ 1.05 | 5.54 $\pm$ 1.48  | 5.62 $\pm$ 0.99  | 76.29 $\pm$ 15.23  |
| high            | 304.4 $\pm$ 78.7* | 3.31 $\pm$ 0.80* | 1.66 $\pm$ 1.31 | 1.34 $\pm$ 0.32* | 5.23 $\pm$ 1.21 | 5.62 $\pm$ 1.47* | 5.75 $\pm$ 0.98* | 78.20 $\pm$ 14.83* |
| BMI             |                   |                  |                 |                  |                 |                  |                  |                    |
| <24             | 279.5 $\pm$ 73.3  | 3.15 $\pm$ 0.80  | 1.35 $\pm$ 1.05 | 1.48 $\pm$ 0.33  | 5.11 $\pm$ 1.09 | 5.39 $\pm$ 1.35  | 5.53 $\pm$ 0.92  | 75.83 $\pm$ 14.26  |
| 24-28           | 313.9 $\pm$ 81.7  | 3.36 $\pm$ 0.81  | 1.85 $\pm$ 1.50 | 1.33 $\pm$ 0.30  | 5.28 $\pm$ 1.18 | 5.64 $\pm$ 1.47  | 5.76 $\pm$ 0.99  | 78.34 $\pm$ 15.37  |
| $\geq$ 28       | 335.5 $\pm$ 85.3  | 3.44 $\pm$ 0.80  | 2.20 $\pm$ 2.13 | 1.27 $\pm$ 0.28  | 5.39 $\pm$ 1.17 | 6.00 $\pm$ 1.74  | 6.02 $\pm$ 1.10  | 78.95 $\pm$ 15.44  |
| Glucose status  |                   |                  |                 |                  |                 |                  |                  |                    |
| normal          | 294.9 $\pm$ 81.3  | 3.12 $\pm$ 0.76  | 1.54 $\pm$ 1.38 | 1.41 $\pm$ 0.32  | 5.05 $\pm$ 1.10 | 5.09 $\pm$ 0.54  | 5.16 $\pm$ 0.36  | 76.81 $\pm$ 14.77  |
| prediabetes     | 313.1 $\pm$ 81.1  | 3.51 $\pm$ 0.81  | 1.71 $\pm$ 1.17 | 1.38 $\pm$ 0.32  | 5.49 $\pm$ 1.12 | 5.45 $\pm$ 0.72  | 5.93 $\pm$ 0.20  | 77.95 $\pm$ 14.83  |
| diabetes        | 310.9 $\pm$ 81.2  | 3.42 $\pm$ 0.86  | 2.18 $\pm$ 2.14 | 1.29 $\pm$ 0.32  | 5.38 $\pm$ 1.21 | 7.89 $\pm$ 2.63  | 7.38 $\pm$ 1.49  | 78.22 $\pm$ 16.38  |

1  
2  
3 Uric acid: UA; Triglycerides: TG; Total cholesterol: TC; Low-density lipoprotein: LDL;  
4 High-density lipoprotein: HDL; Glycated hemoglobin: HbA1c; Fasting plasma glucose: FPG  
5  
6  
7  
8  
9  
10  
11  
12  
13  
14  
15  
16  
17  
18  
19  
20  
21  
22  
23  
24  
25  
26  
27  
28  
29  
30  
31  
32  
33  
34  
35  
36  
37  
38  
39  
40  
41  
42  
43  
44  
45  
46  
47  
48  
49  
50  
51  
52  
53  
54  
55  
56  
57  
58  
59  
60

**Table 4** Estimated prevalence of HUA in Eastern Chinese population.

|                 | Percentage % (95%CI) |                   |                   |
|-----------------|----------------------|-------------------|-------------------|
|                 | Overall              | Men               | Women             |
| Overall         | 12.3 (11.6, 12.9)    | 17.9 (16.7-19.1)  | 8.5 (7.8-9.3)     |
| Overall*        | 11.3 (9.9, 12.7)     | 20.7 (17.7, 23.7) | 5.6 (4.3, 6.7)    |
| Location        |                      |                   |                   |
| Urban           | 12.9 (12.1, 13.7)    | 19.1 (17.6-20.7)  | 8.9 (8.0-9.8)     |
| Rural           | 10.8 (9.6, 12.0)     | 15.2 (13.1-17.3)  | 7.7 (6.4-9.0)     |
| Age groups      |                      |                   |                   |
| <40             | 10.8 (9.0, 12.5)     | 22.8 (19.0, 26.6) | 3.3 (2.0, 4.5)    |
| 40-60           | 11.2 (10.3, 12.2)    | 18.9 (17.0, 20.8) | 6.5 (5.5, 7.4)    |
| >=60            | 13.9 (12.8, 15.0)    | 15.4 (13.6, 17.2) | 12.8 (11.4, 14.2) |
| Economic status |                      |                   |                   |
| low             | 11.8 (10.9-12.8)     | 18.3 (16.5-20.1)  | 7.2 (6.1-8.2)     |
| high            | 12.6 (11.7-13.5)     | 17.5 (15.8-19.2)  | 9.5 (8.5-10.6)    |
| BMI             |                      |                   |                   |
| <24             | 6.7 (5.9, 7.5)       | 10.5 (8.9, 12.2)  | 4.8 (3.9, 5.6)    |
| 24-28           | 14.1 (13.0, 15.3)    | 19.9 (18.0, 21.9) | 9.4 (8.1, 10.7)   |
| >=28            | 22.5 (20.3, 24.6)    | 27.3 (23.9, 30.8) | 18.5 (15.7, 21.2) |
| Glucose status  |                      |                   |                   |
| normal          | 10.1 (9.3-10.9)      | 17.5 (15.8-19.2)  | 5.7 (4.9-6.5)     |
| prediabetes     | 15.2 (13.9-16.6)     | 20.3 (17.9-22.7)  | 11.6 (10.0-13.2)  |
| diabetes        | 15.1 (13.1-17.0)     | 15.0 (12.1-17.8)  | 15.2 (12.5-17.9)  |

Body mass index: BMI

\* standardized by proportions of population of 6th national population census data

**Table 5** Risk factors for HUA in Eastern Chinese population.

| Risk factors                    | OR    | (95%CI)      |
|---------------------------------|-------|--------------|
| Female sex                      | 0.510 | 0.427, 0.609 |
| Age per 10 years                | 1.041 | 0.976, 1.112 |
| Urban residency                 | 2.218 | 1.681, 2.927 |
| ≥Junior middle school education | 1.042 | 0.866, 1.253 |
| Lipids                          |       |              |
| LDL per 1SD                     | 1.018 | 0.888, 1.168 |
| HDL per 1SD                     | 0.936 | 0.850, 1.032 |
| TC per 1SD                      | 1.226 | 1.050, 1.432 |
| TG per 1SD                      | 1.672 | 1.491, 1.875 |
| Current smoking                 | 0.942 | 0.778, 1.141 |
| Current drinking                | 0.913 | 0.784, 1.062 |
| BMI                             |       |              |
| Overweight                      | 1.772 | 1.481, 2.120 |
| Obesity                         | 2.874 | 2.338, 3.532 |
| Blood pressure                  |       |              |
| SBP per 10mmHg                  | 1.055 | 1.009, 1.103 |
| DBP per 10mmHg                  | 1.012 | 0.944, 1.085 |
| High economic status            | 0.688 | 0.538, 0.879 |

Data are expressed as unStandardized B (95%CI). The enter procedure was used.

Body mass index: BMI

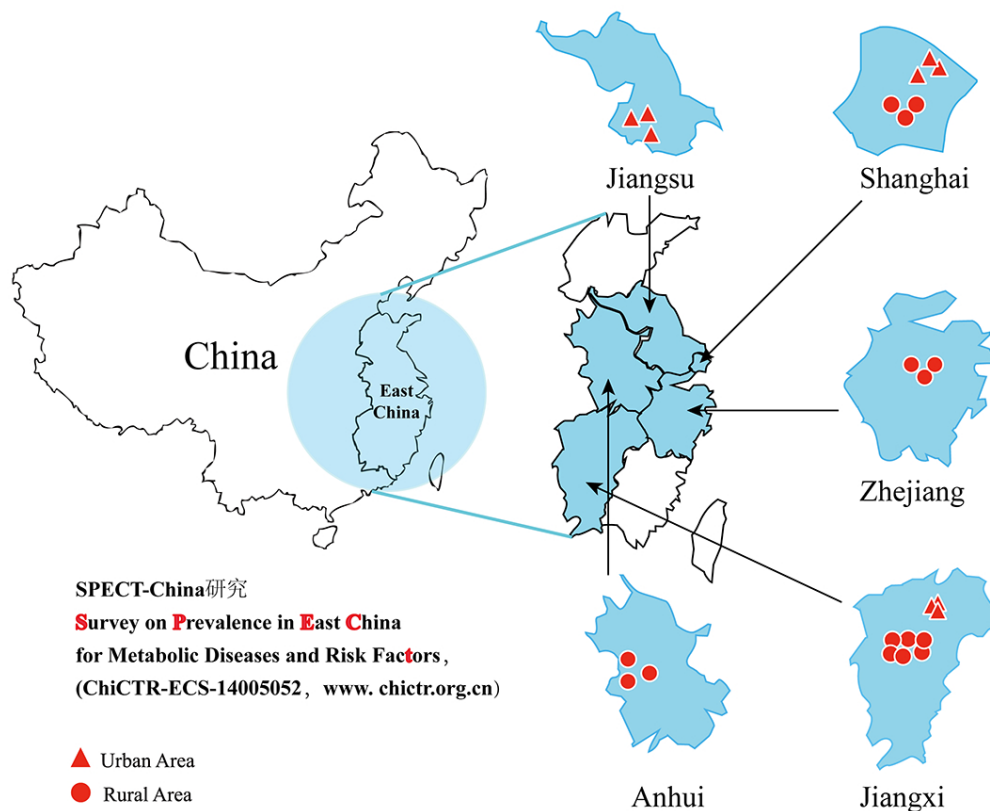

**Supplemental Table 1** Estimated prevalence of HUA (UA>420 $\mu$ mol/L) in Eastern Chinese population.

|                 | Percentage % (95%CI) |                |
|-----------------|----------------------|----------------|
|                 | Overall              | Women          |
| Overall         | 8.4 (7.8, 9.0)       | 2.1 (1.7, 2.5) |
| Overall*        | 8.8 (7.5, 10.1)      | 1.4 (0.7, 2.0) |
| Location        |                      |                |
| Urban           | 8.8 (8.1, 9.5)       | 2.1 (1.7, 2.6) |
| Rural           | 7.5 (6.5, 8.5)       | 1.9 (1.3, 2.6) |
| Age groups      |                      |                |
| <40             | 9.3 (7.7, 10.9)      | 0.9 (0.2, 1.6) |
| 40-60           | 8.0 (7.2, 8.8)       | 1.3 (0.8, 1.7) |
| $\geq$ 60       | 8.5 (7.6, 9.4)       | 3.5 (2.7, 4.2) |
| Economic status |                      |                |
| low             | 8.6 (7.7, 9.5)       | 1.6 (1.1, 2.0) |
| high            | 8.2 (7.5, 9.0)       | 2.5 (1.9, 3.0) |
| BMI             |                      |                |
| <24             | 4.2 (3.6, 4.8)       | 0.9 (0.6, 1.3) |
| 24-28           | 10.1 (9.1, 11.1)     | 2.1 (1.4, 2.7) |
| $\geq$ 28       | 15.7 (13.8, 17.6)    | 6.0 (4.4, 7.7) |
| Glucose status  |                      |                |
| normal          | 7.3 (6.6, 8.0)       | 1.1 (0.8, 1.5) |
| prediabetes     | 10.3 (9.1, 11.4)     | 3.1 (2.2, 3.9) |
| diabetes        | 9.4 (7.8, 10.9)      | 4.6 (3.0, 6.1) |

Body mass index: BMI

\* standardized by proportions of population of 6th national population census data

**Supplemental table 2** Risk factors for HUA (UA>420 $\mu$ mol/L) in Eastern Chinese population.

| Risk factors                          | OR    | (95%CI)      |
|---------------------------------------|-------|--------------|
| Female sex                            | 0.110 | 0.086, 0.142 |
| Age per 10 years                      | 0.937 | 0.867, 1.013 |
| Urban residency                       | 2.292 | 1.654, 3.176 |
| $\geq$ Junior middle school education | 1.037 | 0.835, 1.288 |
| Lipids                                |       |              |
| LDL per 1SD                           | 1.014 | 0.861, 1.193 |
| HDL per 1SD                           | 0.984 | 0.873, 1.109 |
| TC per 1SD                            | 1.209 | 1.004, 1.456 |
| TG per 1SD                            | 1.724 | 1.504, 1.978 |
| Current smoking                       | 0.921 | 0.755, 1.123 |
| Current drinking                      | 1.008 | 0.841, 1.209 |
| BMI                                   |       |              |
| Overweight                            | 1.812 | 1.448, 2.268 |
| Obesity                               | 2.835 | 2.191, 3.668 |
| Blood pressure                        |       |              |
| SBP per 10mmHg                        | 1.082 | 1.023, 1.145 |
| DBP per 10mmHg                        | 1.017 | 0.932, 1.109 |
| High economic status                  | 0.670 | 0.504, 0.890 |

Data are expressed as unStandardized B (95%CI). The enter procedure was used.

Body mass index: BMI



## STROBE Statement

Checklist of items that should be included in reports of observational studies

| Section/Topic            | Item No | Recommendation                                                                                                                                                                             | Reported on Page No |
|--------------------------|---------|--------------------------------------------------------------------------------------------------------------------------------------------------------------------------------------------|---------------------|
| Title and abstract       | 1       | (a) Indicate the study's design with a commonly used term in the title or the abstract                                                                                                     | 1,2                 |
|                          |         | (b) Provide in the abstract an informative and balanced summary of what was done and what was found                                                                                        | 1,2                 |
| <b>Introduction</b>      |         |                                                                                                                                                                                            |                     |
| Background/rationale     | 2       | Explain the scientific background and rationale for the investigation being reported                                                                                                       | 5                   |
| Objectives               | 3       | State specific objectives, including any prespecified hypotheses                                                                                                                           | 5                   |
| <b>Methods</b>           |         |                                                                                                                                                                                            |                     |
| Study design             | 4       | Present key elements of study design early in the paper                                                                                                                                    | 7                   |
| Setting                  | 5       | Describe the setting, locations, and relevant dates, including periods of recruitment, exposure, follow-up, and data collection                                                            | 7                   |
| Participants             | 6       | (a) <i>Cohort study</i> —Give the eligibility criteria, and the sources and methods of selection of participants. Describe methods of follow-up                                            | 7                   |
|                          |         | <i>Case-control study</i> —Give the eligibility criteria, and the sources and methods of case ascertainment and control selection. Give the rationale for the choice of cases and controls |                     |
|                          |         | <i>Cross-sectional study</i> —Give the eligibility criteria, and the sources and methods of selection of participants                                                                      |                     |
| Variables                | 7       | (b) <i>Cohort study</i> —For matched studies, give matching criteria and number of exposed and unexposed                                                                                   | Not                 |
|                          |         | <i>Case-control study</i> —For matched studies, give matching criteria and the number of controls per case                                                                                 | Applicable          |
|                          |         | Clearly define all outcomes, exposures, predictors, potential confounders, and effect modifiers. Give diagnostic criteria, if applicable                                                   | 7,8                 |
| Data sources/measurement | 8*      | For each variable of interest, give sources of data and details of methods of assessment (measurement). Describe comparability of assessment methods if there is more than one group       | 7,8                 |
| Bias                     | 9       | Describe any efforts to address potential sources of bias                                                                                                                                  | 7                   |
| Study size               | 10      | Explain how the study size was arrived at                                                                                                                                                  | 7                   |
| Quantitative variables   | 11      | Explain how quantitative variables were handled in the analyses. If applicable, describe which groupings were chosen and why                                                               | 7                   |
| Statistical methods      | 12      | (a) Describe all statistical methods, including those used to control for confounding                                                                                                      | 8                   |
|                          |         | (b) Describe any methods used to examine subgroups and interactions                                                                                                                        | 8                   |
|                          |         | (c) Explain how missing data were addressed                                                                                                                                                | 7                   |
|                          |         | (d) <i>Cohort study</i> —If applicable, explain how loss to follow-up was addressed                                                                                                        | 8                   |
|                          |         | <i>Case-control study</i> —If applicable, explain how matching of cases and controls was addressed                                                                                         |                     |
|                          |         | <i>Cross-sectional study</i> —If applicable, describe analytical methods taking account of sampling strategy                                                                               |                     |
|                          |         | (e) Describe any sensitivity analyses                                                                                                                                                      | 8                   |

| Section/Topic            | Item No | Recommendation                                                                                                                                                                                               | Reported on Page No |
|--------------------------|---------|--------------------------------------------------------------------------------------------------------------------------------------------------------------------------------------------------------------|---------------------|
| <b>Results</b>           |         |                                                                                                                                                                                                              |                     |
| Participants             | 13*     | (a) Report numbers of individuals at each stage of study—eg numbers potentially eligible, examined for eligibility, confirmed eligible, included in the study, completing follow-up, and analysed            | 7                   |
|                          |         | (b) Give reasons for non-participation at each stage                                                                                                                                                         | 7                   |
|                          |         | (c) Consider use of a flow diagram                                                                                                                                                                           | 7                   |
| Descriptive data         | 14*     | (a) Give characteristics of study participants (eg demographic, clinical, social) and information on exposures and potential confounders                                                                     | 8                   |
|                          |         | (b) Indicate number of participants with missing data for each variable of interest                                                                                                                          | 7                   |
|                          |         | (c) <i>Cohort study</i> —Summarise follow-up time (eg, average and total amount)                                                                                                                             | Not Applicable      |
| Outcome data             | 15*     | <i>Cohort study</i> —Report numbers of outcome events or summary measures over time                                                                                                                          | Not Applicable      |
|                          |         | <i>Case-control study</i> —Report numbers in each exposure category, or summary measures of exposure                                                                                                         | Not Applicable      |
|                          |         | <i>Cross-sectional study</i> —Report numbers of outcome events or summary measures                                                                                                                           | 8                   |
| Main results             | 16      | (a) Give unadjusted estimates and, if applicable, confounder-adjusted estimates and their precision (eg, 95% confidence interval). Make clear which confounders were adjusted for and why they were included | 10                  |
|                          |         | (b) Report category boundaries when continuous variables were categorized                                                                                                                                    | 10                  |
|                          |         | (c) If relevant, consider translating estimates of relative risk into absolute risk for a meaningful time period                                                                                             | Not Applicable      |
| Other analyses           | 17      | Report other analyses done—eg analyses of subgroups and interactions, and sensitivity analyses                                                                                                               | 10,11               |
| <b>Discussion</b>        |         |                                                                                                                                                                                                              |                     |
| Key results              | 18      | Summarise key results with reference to study objectives                                                                                                                                                     | 12                  |
| Limitations              | 19      | Discuss limitations of the study, taking into account sources of potential bias or imprecision. Discuss both direction and magnitude of any potential bias                                                   | 13                  |
| Interpretation           | 20      | Give a cautious overall interpretation of results considering objectives, limitations, multiplicity of analyses, results from similar studies, and other relevant evidence                                   | 12                  |
| Generalisability         | 21      | Discuss the generalisability (external validity) of the study results                                                                                                                                        | 13                  |
| <b>Other Information</b> |         |                                                                                                                                                                                                              |                     |

|   |         |    |                                                                                                                                                               |    |
|---|---------|----|---------------------------------------------------------------------------------------------------------------------------------------------------------------|----|
| 1 | Funding | 22 | Give the source of funding and the role of the funders for the present study and, if applicable, for the original study on which the present article is based | 14 |
|---|---------|----|---------------------------------------------------------------------------------------------------------------------------------------------------------------|----|

2

3 *\*Give information separately for cases and controls in case-control studies and, if applicable, for exposed and unexposed groups in cohort and cross-sectional studies.*

4 **Note:** An Explanation and Elaboration article discusses each checklist item and gives methodological background and published examples of transparent reporting. The STROBE checklist is

5 best used in conjunction with this article (freely available on the Web sites of PLoS Medicine at <http://www.plosmedicine.org/>, Annals of Internal Medicine at <http://www.annals.org/>, and

6 Epidemiology at <http://www.epidem.com/>). Information on the STROBE Initiative is available at [www.strobe-statement.org](http://www.strobe-statement.org).

7

8

9

10

11

12

13

14

15

16

17

18

19

20

21

22

23

24

25

26

27

28

29

30

31

32

33

34

35

36

37

38

39

40

41

42

43

44

45

46

47

For peer review only
