# Supplementary material for: Prevalence of hyperuricaemia in an Eastern Chinese population: a cross-sectional study
Source: PubMed Central journal article supplement — BMJ Open. 2020 May 20;10(5):e035614. doi: 10.1136/bmjopen-2019-035614 (PMC7247391; doi:10.1136/bmjopen-2019-035614), 2020-05-20
Supplement: bmjopen-2019-035614supp002.pdf [file bmjopen-2019-035614supp002.pdf]

**Supplemental Table 1** Estimated prevalence of HUA (UA>420 $\mu$ mol/L) in Eastern Chinese population.

|                 | Percentage % (95%CI) |                |
|-----------------|----------------------|----------------|
|                 | Overall              | Women          |
| Overall         | 8.4 (7.8, 9.0)       | 2.1 (1.7, 2.5) |
| Overall*        | 8.8 (7.5, 10.1)      | 1.4 (0.7, 2.0) |
| Location        |                      |                |
| Urban           | 8.8 (8.1, 9.5)       | 2.1 (1.7, 2.6) |
| Rural           | 7.5 (6.5, 8.5)       | 1.9 (1.3, 2.6) |
| Age groups      |                      |                |
| <40             | 9.3 (7.7, 10.9)      | 0.9 (0.2, 1.6) |
| 40-60           | 8.0 (7.2, 8.8)       | 1.3 (0.8, 1.7) |
| $\geq$ 60       | 8.5 (7.6, 9.4)       | 3.5 (2.7, 4.2) |
| Economic status |                      |                |
| low             | 8.6 (7.7, 9.5)       | 1.6 (1.1, 2.0) |
| high            | 8.2 (7.5, 9.0)       | 2.5 (1.9, 3.0) |
| BMI             |                      |                |
| <24             | 4.2 (3.6, 4.8)       | 0.9 (0.6, 1.3) |
| 24-28           | 10.1 (9.1, 11.1)     | 2.1 (1.4, 2.7) |
| $\geq$ 28       | 15.7 (13.8, 17.6)    | 6.0 (4.4, 7.7) |
| Glucose status  |                      |                |
| normal          | 7.3 (6.6, 8.0)       | 1.1 (0.8, 1.5) |
| prediabetes     | 10.3 (9.1, 11.4)     | 3.1 (2.2, 3.9) |
| diabetes        | 9.4 (7.8, 10.9)      | 4.6 (3.0, 6.1) |

Body mass index: BMI

\* standardized by proportions of population of 6th national population census data

**Supplemental table 2** Risk factors for HUA (UA>420 $\mu$ mol/L) in Eastern Chinese population.

| Risk factors                          | OR    | (95%CI)      |
|---------------------------------------|-------|--------------|
| Female sex                            | 0.110 | 0.086, 0.142 |
| Age per 10 years                      | 0.937 | 0.867, 1.013 |
| Urban residency                       | 2.292 | 1.654, 3.176 |
| $\geq$ Junior middle school education | 1.037 | 0.835, 1.288 |
| Lipids                                |       |              |
| LDL per 1SD                           | 1.014 | 0.861, 1.193 |
| HDL per 1SD                           | 0.984 | 0.873, 1.109 |
| TC per 1SD                            | 1.209 | 1.004, 1.456 |
| TG per 1SD                            | 1.724 | 1.504, 1.978 |
| Current smoking                       | 0.921 | 0.755, 1.123 |
| Current drinking                      | 1.008 | 0.841, 1.209 |
| BMI                                   |       |              |
| Overweight                            | 1.812 | 1.448, 2.268 |
| Obesity                               | 2.835 | 2.191, 3.668 |
| Blood pressure                        |       |              |
| SBP per 10mmHg                        | 1.082 | 1.023, 1.145 |
| DBP per 10mmHg                        | 1.017 | 0.932, 1.109 |
| High economic status                  | 0.670 | 0.504, 0.890 |

Data are expressed as unStandardized B (95%CI). The enter procedure was used.

Body mass index: BMI
