# Supplementary figures and images for: Prevalence of hyperuricaemia in an Eastern Chinese population: a cross-sectional study
Source: PubMed Central journal article supplement — BMJ Open. 2020 May 20;10(5):e035614. doi: 10.1136/bmjopen-2019-035614 (PMC7247391; doi:10.1136/bmjopen-2019-035614), 2020-05-20

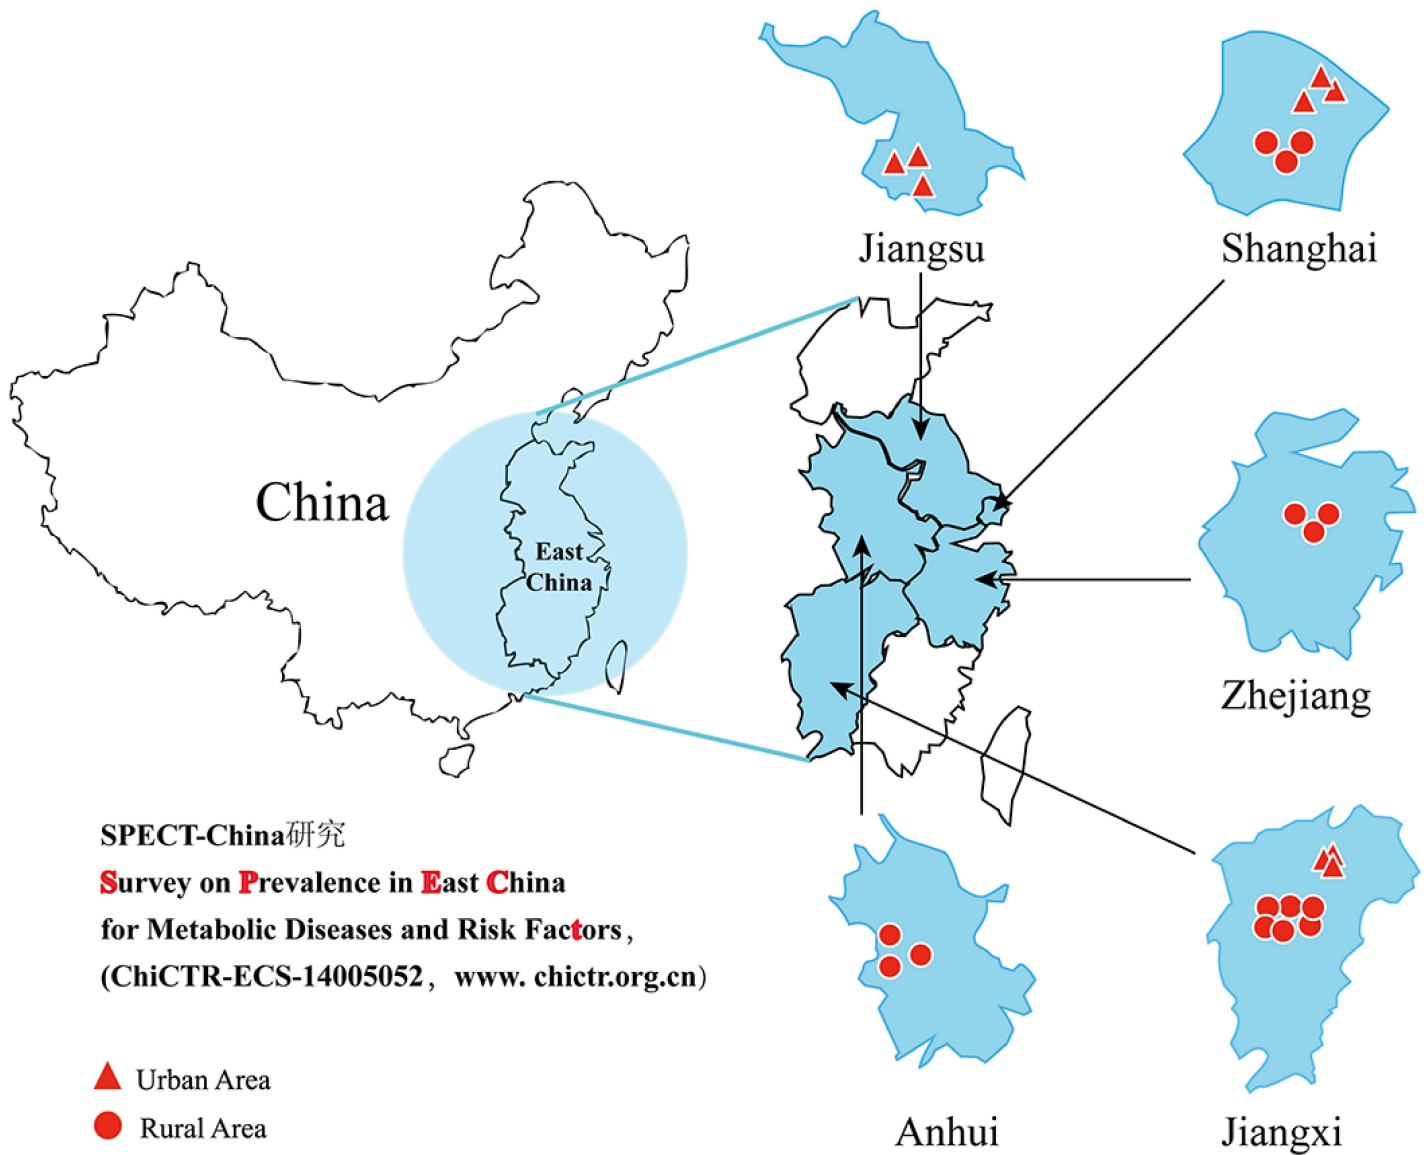

Supplement: bmjopen-2019-035614supp001.pdf [file bmjopen-2019-035614supp001.pdf]
